# Supplementary material for: Oxidant-controlled divergent transformations of 3-aminoindazoles for the synthesis of pyrimido[1,2-b]-indazoles and aromatic nitrile-derived dithioacetals
Source: Royal Society of Chemistry journal article supplement (doi:10.1039/c9qo00847k), 2019-01-01

## Supporting Information

*For*

### **Oxidant-Controlled Divergent Transformations of 3-Aminoindazoles for the Synthesis of Pyrimido[1,2-b]-indazoles and Aromatic Nitrile-derived Dithioacetals**

Yao Zhou,<sup>a</sup> Yixian Lou,<sup>b</sup> Ya Wang,<sup>a</sup> Qiuling Song<sup>\*a,b,c</sup>

<sup>a</sup> Institute of Next Generation Matter Transformation, College of Chemical Engineering at Huaqiao University, 668 Jimei Blvd, Xiamen, Fujian, 361021, P. R. China

<sup>b</sup> Collaborative Innovation Center of Yangtze River Delta Region Green Pharmaceuticals, Zhejiang University of Technology, Hangzhou, Zhejiang, 310000, P. R. China

<sup>c</sup> Key Laboratory of Molecule Synthesis and Function Discovery, Fujian Province University, College of Chemistry at Fuzhou University, Fuzhou, Fujian, 350108, P. R. China

fax:(+86)-592-6162990; email: qsong@hqu.edu.cn

## Table of Contents

|                                                          |    |
|----------------------------------------------------------|----|
| 1. General information.....                              | 3  |
| 2. General procedure for the synthesis of <b>3</b> ..... | 4  |
| 3. General procedure for the synthesis of <b>4</b> ..... | 4  |
| 4. Crystal data of <b>3s</b> and <b>4m</b> .....         | 5  |
| 5. Characterization data for products.....               | 7  |
| 6. NMR spectroscopic data .....                          | 21 |

## 1. General information

All chemicals were purchased from Adamas Reagent, Ltd, Energy chemical company, J&K Scientific Ltd, Alfa Aesa chemical company and so forth. CH<sub>3</sub>CN was dried by CaH prior to use. Unless otherwise stated, all experiments were conducted in a seal tube under air atmosphere. Reactions were monitored by TLC or GC-MS analysis. Flash column chromatography was performed over silica gel (200-300 mesh).

<sup>1</sup>H-NMR and <sup>13</sup>C-NMR spectra were recorded in CDCl<sub>3</sub> on a Bruker Avance 500 spectrometer (500 MHz <sup>1</sup>H, 125 MHz <sup>13</sup>C) at room temperature. Chemical shifts were reported in ppm on the scale relative to CDCl<sub>3</sub> ( $\delta = 7.26$  for <sup>1</sup>H-NMR,  $\delta = 77.00$  for <sup>13</sup>C-NMR) or DMSO-*d*<sub>6</sub> ( $\delta = 2.50$  for <sup>1</sup>H-NMR,  $\delta = 39.60$  for <sup>13</sup>C-NMR) as an internal reference. High resolution mass spectra were recorded using Q-TOF time-of-flight mass spectrometer. Coupling constants (*J*) were reported in Hertz (Hz). The starting materials 1*H*-indazol-3-amine and 4-chloro-1*H*-indazol-3-amine, 5-bromo-1*H*-indazol-3-amine were purchased from Bide Pharmatech Ltd. Other 1*H*-indazol-3-amines were synthesized according to methods reported by previous literatures.<sup>1</sup>

---

<sup>1</sup> (a) S. Antonyamy, G. Hirst, F. Park, P. Sprengeler, F. Stappenbeck, P. Steensma, M. Wilson, M. Wong, *Bioorg. Med. Chem. Lett.* **2009**, *19*, 279. (b) W. Kong, Y. Zhou, Q. Song, *Adv. Synth. Catal.* **2018**, *360*, 1943.

## 2. General procedure for the synthesis of 3

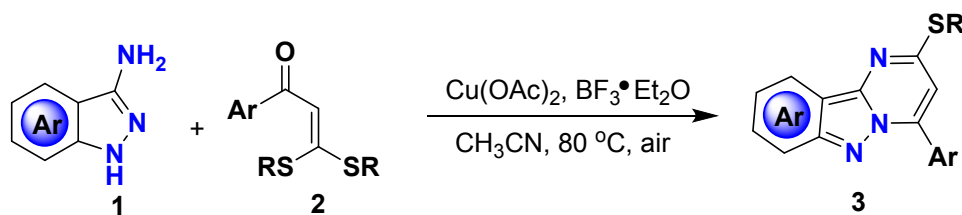

In a sealed tube were placed **1** (0.3 mmol, 1 equiv), **2** (0.2 mmol, 1 equiv) and  $\text{Cu}(\text{OAc})_2$  (10 mol%) in  $\text{CH}_3\text{CN}$  (1 mL). Then  $\text{BF}_3 \cdot \text{Et}_2\text{O}$  (28.4 mg, 0.2 mmol, 1.0 equiv) was added to the tube. The resulting mixture was stirred at  $80^\circ\text{C}$  for overnight. Upon completion of the reaction, the solvent was evaporated under reduced pressure and the residue was purified by flash column chromatograph (silica gel, petroleum ether:EtOAc = 40:1, v/v) to give the desired product **3**.

## 3. General procedure for the synthesis of 4

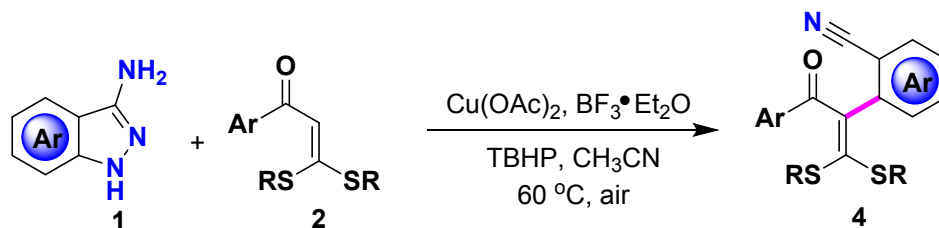

In a sealed tube were placed **1** (0.3 mmol, 1 equiv), **2** (0.2 mmol, 1 equiv) and  $\text{Cu}(\text{OAc})_2$  (10 mol%) in  $\text{CH}_3\text{CN}$  (1 mL). Then  $\text{BF}_3 \cdot \text{Et}_2\text{O}$  (28.4 mg, 0.2 mmol, 1.0 equiv) and TBHP (0.4 mmol, 2 equiv) were added to the tube. The resulting mixture was stirred at  $60^\circ\text{C}$  for 18 h. Upon completion of the reaction, the solvent was evaporated under reduced pressure and the residue was purified by flash column chromatograph (silica gel, petroleum ether:EtOAc = 80:1, v/v) to give the desired product **4**.

#### 4. Crystal data of 3s and 4m

Crystallographic data for compound **3s** (CCDC-1906431) has been deposited with the Cambridge Crystallographic Data Centre, Copies of the data can be obtained, free of charge, on application to CCDC (Email:deposit@ccdc.cam.ac.uk).

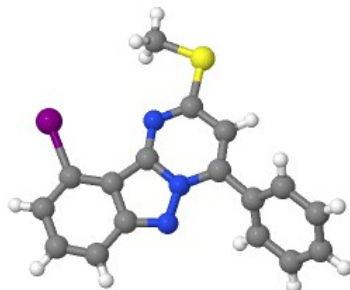

Displacement ellipsoids are drawn at 30% probability level

|                                         |                                             |                                 |
|-----------------------------------------|---------------------------------------------|---------------------------------|
| Bond precision:                         | C-C = 0.0082 Å                              | Wavelength=0.71073              |
| Cell:                                   | a=4.1200(5)    b=14.2279(12)    c=26.763(2) |                                 |
|                                         | alpha=90    beta=94.268(8)    gamma=90      |                                 |
| Temperature:                            | 295 K                                       |                                 |
|                                         | Calculated                                  | Reported                        |
| Volume                                  | 1564.5(3)                                   | 1564.5(3)                       |
| Space group                             | P 21/n                                      | P 21/n                          |
| Hall group                              | -P 2yn                                      | -P 2yn                          |
| Moiety formula                          | C17 H12 I N3 S                              | C17 H12 I N3 S                  |
| Sum formula                             | C17 H12 I N3 S                              | C17 H12 I N3 S                  |
| Mr                                      | 417.26                                      | 417.26                          |
| Dx, g cm <sup>-3</sup>                  | 1.771                                       | 1.772                           |
| Z                                       | 4                                           | 4                               |
| Mu (mm <sup>-1</sup> )                  | 2.179                                       | 2.179                           |
| F000                                    | 816.0                                       | 816.0                           |
| F000'                                   | 814.82                                      |                                 |
| h,k,lmax                                | 5,17,32                                     | 5,17,32                         |
| Nref                                    | 3067                                        | 3060                            |
| Tmin,Tmax                               | 0.599,0.706                                 | 0.462,1.000                     |
| Tmin'                                   | 0.587                                       |                                 |
| Correction method= # Reported T Limits: | Tmin=0.462                                  |                                 |
| Tmax=1.000                              |                                             |                                 |
| AbsCorr = MULTI-SCAN                    |                                             |                                 |
| Data completeness= 0.998                |                                             | Theta(max)= 25.998              |
| R(reflections)= 0.0463( 2798)           |                                             | wR2(reflections)= 0.0989( 3060) |
| S = 1.124                               | Npar= 201                                   |                                 |

Crystallographic data for compound **4m** (CCDC-1874924) has been deposited with the Cambridge Crystallographic Data Centre, Copies of the data can be obtained, free of charge, on application to CCDC (Email:deposit@ccdc.cam.ac.uk).

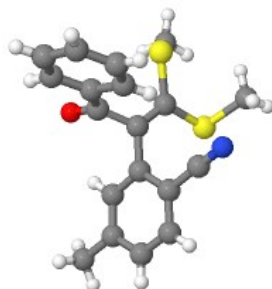

Displacement ellipsoids are drawn at 30% probability level

|                    |                                               |                                 |
|--------------------|-----------------------------------------------|---------------------------------|
| Bond precision:    | C-C = 0.0054 Å                                | Wavelength=0.71073              |
| Cell:              | a=10.1327(10)    b=12.0719(14)    c=28.967(3) |                                 |
|                    | alpha=90    beta=90    gamma=90               |                                 |
| Temperature:       | 298 K                                         |                                 |
|                    | Calculated                                    | Reported                        |
| Volume             | 3543.3(7)                                     | 3543.3(7)                       |
| Space group        | P b c a                                       | P b c a                         |
| Hall group         | -P 2ac 2ab                                    | -P 2ac 2ab                      |
| Moiety formula     | C19 H17 N O S2                                | C19 H17 N O S2                  |
| Sum formula        | C19 H17 N O S2                                | C19 H17 N O S2                  |
| Mr                 | 339.46                                        | 339.49                          |
| Dx,g cm-3          | 1.273                                         | 1.273                           |
| Z                  | 8                                             | 8                               |
| Mu (mm-1)          | 0.304                                         | 0.304                           |
| F000               | 1424.0                                        | 1426.5                          |
| F000'              | 1426.45                                       |                                 |
| h,k,lmax           | 12,14,34                                      | 12,14,34                        |
| Nref               | 3117                                          | 3111                            |
| Tmin,Tmax          |                                               | 0.097,1.000                     |
| Tmin'              |                                               |                                 |
| Correction method= | # Reported T Limits: Tmin=0.097 Tmax=1.000    |                                 |
| AbsCorr =          | MULTI-SCAN                                    |                                 |
| Data completeness= | 0.998                                         | Theta(max)= 25.000              |
| R(reflections)=    | 0.0631( 1790)                                 | wR2(reflections)= 0.1421( 3111) |
| S =                | 0.951                                         | Npar= 210                       |

## 5. Characterization data for products

### 2-(ethylthio)-4-phenylpyrimido[1,2-b]indazole (3a)

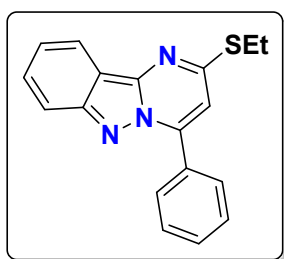

The reaction was performed following the general procedure. The residue was purified by flash column chromatograph (silica gel, petroleum ether:AcOEt = 40:1, v/v) to give the product as a yellow solid (52.5 mg, 86%). <sup>1</sup>H NMR (500 MHz, CDCl<sub>3</sub>) δ 8.25 (d, *J* = 8.3 Hz, 1H), 8.17 – 8.07 (m, 2H), 7.78 (d, *J* = 8.7 Hz, 1H), 7.61 – 7.51 (m, 4H), 7.25 – 7.19 (m, 1H), 7.06 (s, 1H), 3.43 (q, *J* = 7.4 Hz, 2H), 1.53 (t, *J* = 7.4 Hz, 3H). <sup>13</sup>C NMR (126 MHz, CDCl<sub>3</sub>) δ 157.0, 151.0, 144.7, 144.3, 131.1, 130.9, 129.5, 129.4, 128.7, 120.8, 120.1, 116.4, 112.4, 110.5, 24.6, 14.4. HRMS (ESI, *m/z*) calcd for C<sub>18</sub>H<sub>16</sub>N<sub>3</sub> [M+H]<sup>+</sup>: 306.1059; found: 306.1060.

### 2-(ethylthio)-4-(p-tolyl)pyrimido[1,2-b]indazole (3b)

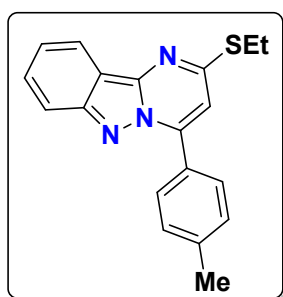

The reaction was performed following the general procedure. The residue was purified by flash column chromatograph (silica gel, petroleum ether:AcOEt = 40:1, v/v) to give the product as a yellow solid (56.1 mg, 88%). <sup>1</sup>H NMR (500 MHz, CDCl<sub>3</sub>) δ 8.27 (d, *J* = 8.3 Hz, 1H), 8.04 (d, *J* = 8.1 Hz, 2H), 7.80 (d, *J* = 8.7 Hz, 1H), 7.60 – 7.54 (m, 1H), 7.41 (d, *J* = 8.0 Hz, 2H), 7.26 – 7.21 (m, 1H), 7.08 (s, 1H), 3.45 (q, *J* = 7.4 Hz, 2H), 2.49 (s, 3H), 1.55 (t, *J* = 7.4 Hz, 3H). <sup>13</sup>C NMR (126 MHz, CDCl<sub>3</sub>) δ 156.9, 150.9, 144.7, 144.5, 141.4, 129.5, 129.4, 129.3, 128.2, 120.8, 120.0, 116.4, 112.4, 110.1, 24.6, 21.5, 14.4. HRMS (ESI, *m/z*) calcd for C<sub>19</sub>H<sub>18</sub>N<sub>3</sub>S [M+H]<sup>+</sup>: 320.1216; found: 320.1219.

### 4-(4-ethylphenyl)-2-(ethylthio)pyrimido[1,2-b]indazole (3c)

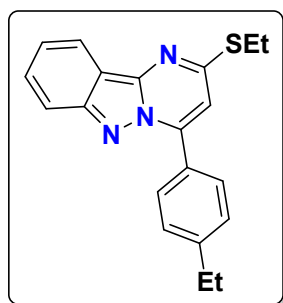

The reaction was performed following the general procedure. The residue was purified by flash column chromatograph (silica gel, petroleum ether:AcOEt = 40:1, v/v) to give the product as a yellow solid (54.6 mg, 82%). <sup>1</sup>H NMR (500 MHz, CDCl<sub>3</sub>) δ 8.25 (d, *J* = 8.3 Hz, 1H), 8.05 (d, *J* = 8.2 Hz, 2H), 7.78 (d, *J* = 8.7 Hz, 1H), 7.58 – 7.52 (m, 1H), 7.42 (d, *J* = 8.2 Hz, 2H), 7.22 (dd, *J* = 10.9, 3.9 Hz, 1H), 7.06 (s, 1H), 3.42 (q, *J* = 7.4 Hz, 2H), 2.77 (q, *J* = 7.6 Hz, 2H), 1.53 (t, *J* = 7.4 Hz, 3H), 1.32 (t, *J* = 7.6 Hz, 3H). <sup>13</sup>C NMR (126 MHz, CDCl<sub>3</sub>) δ 157.0, 151.0, 147.6, 144.7, 144.5, 129.5, 129.4, 128.4, 128.25, 120.8, 120.0, 116.4, 112.4, 110.2, 28.9, 24.6, 15.3, 14.4. HRMS (ESI, *m/z*) calcd for C<sub>20</sub>H<sub>20</sub>N<sub>3</sub>S [M+H]<sup>+</sup>: 334.1372; found: 334.1375.

### 2-(ethylthio)-4-(4-isopropylphenyl)pyrimido[1,2-b]indazole (3d)

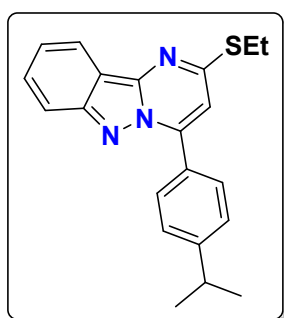

The reaction was performed following the general procedure. The residue was purified by flash column chromatograph (silica gel, petroleum ether:AcOEt = 40:1, v/v) to give the product as a yellow solid (52.1 mg, 75%). <sup>1</sup>H NMR (500 MHz, CDCl<sub>3</sub>) δ 8.25 (d, *J* = 8.3 Hz, 1H), 8.07 (d, *J* = 8.3 Hz, 2H), 7.79 (d, *J* = 8.7 Hz, 1H), 7.54 (ddd, *J* = 8.6, 6.6, 1.1 Hz, 1H), 7.45 (d, *J* = 8.2 Hz, 2H), 7.24 – 7.18 (m, 1H), 7.06 (s, 1H), 3.42 (q, *J* = 7.4 Hz, 2H), 3.02 (dt, *J* = 13.8, 6.9 Hz, 1H), 1.53 (t, *J* = 7.4 Hz, 3H), 1.33 (d, *J* = 6.9 Hz, 6H). <sup>13</sup>C NMR (126 MHz, CDCl<sub>3</sub>) δ 157.0, 152.2, 151.0, 144.7, 144.5, 129.5, 129.4, 128.6, 126.9, 120.9, 120.1, 116.4, 112.4, 110.2, 34.2, 24.6, 23.8, 14.4. HRMS (ESI, *m/z*) calcd for C<sub>21</sub>H<sub>22</sub>N<sub>3</sub>S [M+H]<sup>+</sup>: 348.1529; found: 348.1531.

### 2-(ethylthio)-4-(4-methoxyphenyl)pyrimido[1,2-b]indazole (3e)

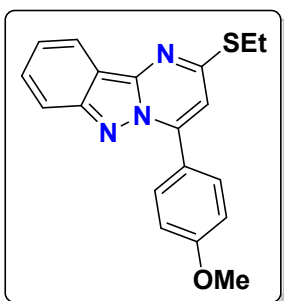

The reaction was performed following the general procedure. The residue was purified by flash column chromatograph (silica gel, petroleum ether:AcOEt = 30:1, v/v) to give the product as a yellow solid (60.3 mg, 90%). <sup>1</sup>H NMR (500 MHz, CDCl<sub>3</sub>) δ 8.24 (d, *J* = 8.3 Hz, 1H), 8.17 – 8.09 (m, 2H), 7.78 (d, *J* = 8.7 Hz, 1H), 7.59 – 7.50 (m, 1H), 7.23 – 7.17 (m, 1H), 7.08 (d, *J* = 8.9 Hz, 2H), 7.04 (s, 1H), 3.90 (s, 3H), 3.42 (q, *J* = 7.4 Hz, 2H), 1.52 (t, *J* = 7.4 Hz, 3H). <sup>13</sup>C NMR (126 MHz, CDCl<sub>3</sub>) δ 161.7, 156.9, 150.9, 144.7, 144.1, 131.1, 129.4, 123.2, 120.9, 12.0, 116.3, 114.1, 112.3, 109.6, 55.4, 24.6, 14.4. HRMS (ESI, *m/z*) calcd for C<sub>19</sub>H<sub>18</sub>N<sub>3</sub>OS [M+H]<sup>+</sup>: 336.1165; found: 336.1165.

### 4-(2-(ethylthio)pyrimido[1,2-b]indazol-4-yl)-N,N-dimethylaniline (3f)

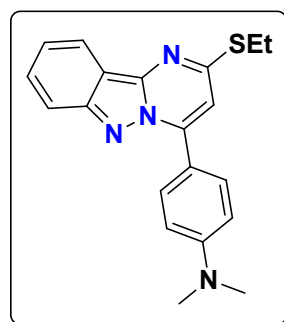

The reaction was performed following the general procedure. The residue was purified by flash column chromatograph (silica gel, petroleum ether:AcOEt = 30:1, v/v) to give the product as a yellow solid (53.6 mg, 77%). <sup>1</sup>H NMR (500 MHz, CDCl<sub>3</sub>) δ 8.24 (d, *J* = 8.3 Hz, 1H), 8.20 – 8.13 (m, 2H), 7.79 (d, *J* = 8.7 Hz, 1H), 7.60 – 7.49 (m, 1H), 7.22 – 7.15 (m, 1H), 7.06 (s, 1H), 6.84 (d, *J* = 9.0 Hz, 2H), 3.41 (q, *J* = 7.4 Hz, 2H), 3.07 (s, 6H), 1.52 (t, *J* = 7.4 Hz, 3H). <sup>13</sup>C NMR (126 MHz, CDCl<sub>3</sub>) δ 156.6, 152.0, 150.8, 144.9, 144.8, 130.8, 129.2, 120.9, 119.7, 117.7, 116.3, 112.3, 111.5, 108.4, 40.1, 24.6, 14.5. HRMS (ESI, *m/z*) calcd for C<sub>20</sub>H<sub>21</sub>N<sub>4</sub>S [M+H]<sup>+</sup>: 349.1481; found: 349.1487.



#### 4-(2,4-dimethoxyphenyl)-2-(ethylthio)pyrimido[1,2-b]indazole (3g)

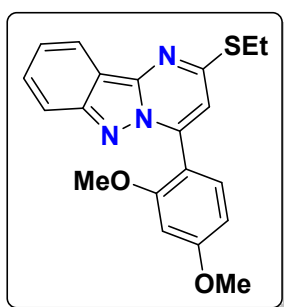

The reaction was performed following the general procedure. The residue was purified by flash column chromatograph (silica gel, petroleum ether:AcOEt = 30:1, v/v) to give the product as a yellow oil (58.9 mg, 81%). <sup>1</sup>H NMR (500 MHz, CDCl<sub>3</sub>) δ 8.25 (d, *J* = 8.3 Hz, 1H), 7.75 (d, *J* = 8.7 Hz, 1H), 7.58 – 7.46 (m, 1H), 7.24 – 7.17 (m, 2H), 7.10 – 7.01 (m, 3H), 3.81 (s, 3H), 3.74 (s, 3H), 3.42 (q, *J* = 7.4 Hz, 2H), 1.53 (t, *J* = 7.4 Hz, 3H). <sup>13</sup>C NMR (126 MHz, CDCl<sub>3</sub>) δ 156.4, 153.5, 151.6, 150.8, 144.2, 142.2, 129.2, 121.0, 120.8, 119.9, 117.4, 116.5, 116.0, 113.3, 112.4, 112.2, 56.4, 55.8, 24.6, 14.4. HRMS (ESI, *m/z*) calcd for C<sub>20</sub>H<sub>20</sub>O<sub>2</sub>N<sub>3</sub>S [M+H]<sup>+</sup>: 366.1271; found: 366.1271.

#### 2-(ethylthio)-4-(3-fluorophenyl)pyrimido[1,2-b]indazole (3h)

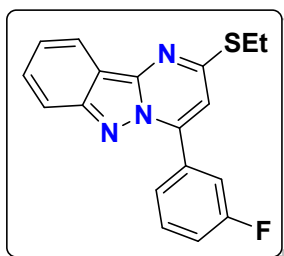

The reaction was performed following the general procedure. The residue was purified by flash column chromatograph (silica gel, petroleum ether:AcOEt = 50:1, v/v) to give the product as a yellow solid (54.9 mg, 85%). <sup>1</sup>H NMR (500 MHz, CDCl<sub>3</sub>) δ 8.24 (d, *J* = 8.3 Hz, 1H), 7.97 – 7.91 (m, 1H), 7.87 (d, *J* = 7.8 Hz, 1H), 7.78 (d, *J* = 8.7 Hz, 1H), 7.60 – 7.51 (m, 2H), 7.31 – 7.26 (m, 1H), 7.25 – 7.20 (m, 1H), 7.07 (s, 1H), 3.43 (q, *J* = 7.4 Hz, 2H), 1.53 (t, *J* = 7.4 Hz, 3H). <sup>13</sup>C NMR (126 MHz, CDCl<sub>3</sub>) δ 162.5 (d, *J* = 247.6 Hz), 157.0, 151.0, 144.7, 142.8, 133.0 (d, *J* = 8.4 Hz), 130.4 (d, *J* = 8.3 Hz), 129.7, 125.1 (d, *J* = 3.1 Hz), 120.8, 120.4, 118.0 (d, *J* = 21.0 Hz), 116.7 (d, *J* = 23.9 Hz), 116.4, 112.4, 110.6, 24.7, 14.3. HRMS (ESI, *m/z*) calcd for C<sub>18</sub>H<sub>15</sub>FN<sub>3</sub>S [M+H]<sup>+</sup>: 324.0965; found: 324.0969.

#### 4-(3-chlorophenyl)-2-(ethylthio)pyrimido[1,2-b]indazole (3i)

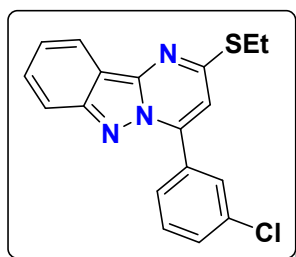

The reaction was performed following the general procedure. The residue was purified by flash column chromatograph (silica gel, petroleum ether:AcOEt = 50:1, v/v) to give the product as a yellow solid (47.5 mg, 70%). <sup>1</sup>H NMR (500 MHz, CDCl<sub>3</sub>) δ 8.24 (d, *J* = 8.3 Hz, 1H), 8.11 (t, *J* = 1.6 Hz, 1H), 8.00 (dt, *J* = 7.4, 1.4 Hz, 1H), 7.77 (d, *J* = 8.7 Hz, 1H), 7.59 – 7.49 (m, 3H), 7.25 – 7.20 (m, 1H), 7.04 (s, 1H). <sup>13</sup>C NMR (126 MHz, CDCl<sub>3</sub>) δ 157.0, 151.0, 144.7, 142.7, 134.7, 132.8, 131.0, 130.0, 129.7, 129.4, 127.6, 120.8, 120.4, 116.4, 112.4, 110.6, 24.7, 14.3. HRMS (ESI, *m/z*) calcd for C<sub>18</sub>H<sub>15</sub>ClN<sub>3</sub>S [M+H]<sup>+</sup>: 340.0670; found: 340.0672.

#### 4-(3-bromophenyl)-2-(ethylthio)pyrimido[1,2-b]indazole (3j)

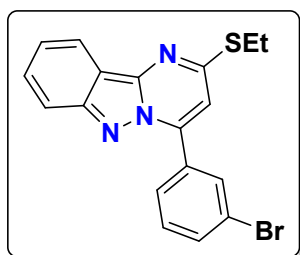

The reaction was performed following the general procedure. The residue was purified by flash column chromatograph (silica gel, petroleum ether:AcOEt = 50:1, v/v) to give the product as a yellow solid (45.2 mg, 59%). <sup>1</sup>H NMR (500 MHz, CDCl<sub>3</sub>) δ 8.31 – 8.23 (m, 2H), 8.09 (dd, *J* = 6.7, 1.1 Hz, 1H), 7.80 (d, *J* = 8.7 Hz, 1H), 7.73

(ddd,  $J = 8.0, 1.8, 0.9$  Hz, 1H), 7.62 – 7.55 (m, 1H), 7.49 (t,  $J = 7.9$  Hz, 1H), 7.26 (dd,  $J = 7.7, 6.9$  Hz, 1H), 7.07 (s, 1H), 3.45 (q,  $J = 7.4$  Hz, 2H), 1.55 (t,  $J = 7.4$  Hz, 3H).  $^{13}\text{C}$  NMR (126 MHz,  $\text{CDCl}_3$ )  $\delta$  157.1, 151.0, 144.7, 142.6, 134.0, 133.1, 132.2, 130.2, 129.7, 128.1, 122.8, 120.8, 120.4, 116.4, 112.4, 110.6, 24.7, 14.3. HRMS (ESI,  $m/z$ ) calcd for  $\text{C}_{18}\text{H}_{15}\text{BrN}_3\text{S}$   $[\text{M}+\text{H}]^+$ : 384.0165; found: 384.0170.

### 2-(ethylthio)-4-(4-(trifluoromethyl)phenyl)pyrimido[1,2-b]indazole (3k)

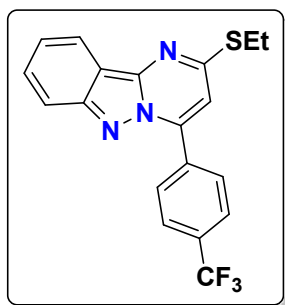

The reaction was performed following the general procedure. The residue was purified by flash column chromatograph (silica gel, petroleum ether:AcOEt = 40:1, v/v) to give the product as a yellow solid (38.8 mg, 52%).  $^1\text{H}$  NMR (500 MHz,  $\text{CDCl}_3$ )  $\delta$  8.24 (t,  $J = 7.9$  Hz, 3H), 7.85 (d,  $J = 8.3$  Hz, 2H), 7.76 (d,  $J = 8.7$  Hz, 1H), 7.60 – 7.51 (m, 1H), 7.26 – 7.19 (m, 1H), 7.06 (s, 1H), 3.43 (q,  $J = 7.4$  Hz, 2H), 1.53 (t,  $J = 7.4$  Hz, 3H).  $^{13}\text{C}$  NMR (126 MHz,  $\text{CDCl}_3$ )  $\delta$  157.2, 151.1, 144.7, 142.7, 134.6, 132.7 (q,  $J = 32.9$  Hz), 130.0, 129.9, 125.7 (q,  $J = 3.7$  Hz), 124.8 (t,  $J = 272.9$  Hz), 120.9, 120.5, 116.4, 112.4, 110.8, 24.7, 14.3. HRMS (ESI,  $m/z$ ) calcd for  $\text{C}_{19}\text{H}_{15}\text{F}_3\text{N}_3\text{S}$   $[\text{M}+\text{H}]^+$ : 374.0933; found: 374.0935.

### 2-(ethylthio)-4-(naphthalen-2-yl)pyrimido[1,2-b]indazole (3l)

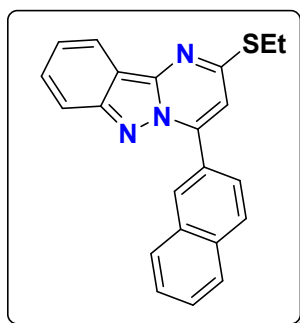

The reaction was performed following the general procedure. The residue was purified by flash column chromatograph (silica gel, petroleum ether:AcOEt = 50:1, v/v) to give the product as a yellow solid (47.6 mg, 67%).  $^1\text{H}$  NMR (500 MHz,  $\text{CDCl}_3$ )  $\delta$  8.64 (s, 1H), 8.28 (d,  $J = 8.3$  Hz, 1H), 8.16 (dd,  $J = 8.6, 1.7$  Hz, 1H), 8.01 (dd,  $J = 20.1, 8.2$  Hz, 2H), 7.93 (d,  $J = 7.9$  Hz, 1H), 7.80 (d,  $J = 8.7$  Hz, 1H), 7.58 (dddd,  $J = 12.0, 8.5, 6.7, 1.2$  Hz, 3H), 7.26 – 7.21 (m, 1H), 7.18 (s, 1H).  $^{13}\text{C}$  NMR (126 MHz,  $\text{CDCl}_3$ )  $\delta$  157.0, 151.0, 144.8, 144.3, 134.4, 132.9, 130.0, 129.6, 128.9, 128.5, 128.3, 127.7, 127.7, 126.7, 125.7, 120.9, 120.2, 116.4, 112.4, 110.7, 24.7, 14.4. HRMS (ESI,  $m/z$ ) calcd for  $\text{C}_{22}\text{H}_{18}\text{N}_3\text{S}$   $[\text{M}+\text{H}]^+$ : 356.1216; found: 356.1220.

### 2-(ethylthio)-4-(furan-2-yl)pyrimido[1,2-b]indazole (3m)

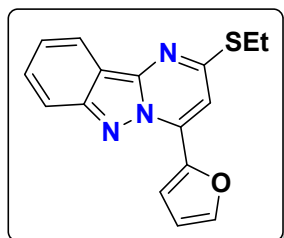

The reaction was performed following the general procedure. The residue was purified by flash column chromatograph (silica gel, petroleum ether:AcOEt = 50:1, v/v) to give the product as a yellow solid (41.3 mg, 70%).  $^1\text{H}$  NMR (500 MHz,  $\text{CDCl}_3$ )  $\delta$  8.50 (d,  $J = 3.5$  Hz, 1H), 8.27 (d,  $J = 8.3$  Hz, 1H), 7.86 (d,  $J = 8.7$  Hz, 1H), 7.73 (d,  $J = 1.0$  Hz, 1H), 7.65 – 7.59 (m, 1H), 7.26 (dd,  $J = 7.7, 7.2$  Hz, 1H), 6.77 (dd,  $J = 3.5, 1.7$  Hz, 1H), 3.44 (q,  $J = 7.4$  Hz, 2H), 1.54 (t,  $J = 7.4$  Hz, 3H).  $^{13}\text{C}$  NMR (126 MHz,  $\text{CDCl}_3$ )  $\delta$  156.1, 151.2, 145.4, 144.7, 144.0, 133.6, 129.7, 121.0, 120.2, 119.9, 116.2, 113.0, 112.3, 105.2, 24.7, 14.4. HRMS (ESI,  $m/z$ ) calcd for  $\text{C}_{16}\text{H}_{14}\text{N}_3\text{SO}$   $[\text{M}+\text{H}]^+$ : 296.0852; found: 296.0852.

### 2-(ethylthio)-4-(thiophen-2-yl)pyrimido[1,2-b]indazole (3n)

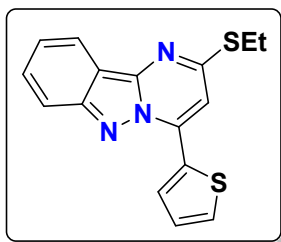

The reaction was performed following the general procedure. The residue was purified by flash column chromatograph (silica gel, petroleum ether:AcOEt = 50:1, v/v) to give the product as a yellow solid (46.0 mg, 73%). <sup>1</sup>H NMR (500 MHz, CDCl<sub>3</sub>) δ 8.41 (dd, *J* = 3.9, 1.1 Hz, 1H), 8.25 (d, *J* = 8.3 Hz, 1H), 7.86 (d, *J* = 8.7 Hz, 1H), 7.74 (dd, *J* = 5.1, 1.0 Hz, 1H), 7.62 – 7.56 (m, 1H), 7.42 (s, 1H), 7.29 (dd, *J* = 5.0, 3.9 Hz, 1H), 7.23 (dd, *J* = 7.8, 7.1 Hz, 1H). <sup>13</sup>C NMR (126 MHz, CDCl<sub>3</sub>) δ 156.2, 150.9, 144.9, 137.8, 132.2, 131.4, 131.3, 129.8, 127.6, 121.0, 120.3, 116.4, 112.5, 106.6, 24.8, 14.5. HRMS (ESI, *m/z*) calcd for C<sub>16</sub>H<sub>14</sub>N<sub>3</sub>S<sub>2</sub> [M+H]<sup>+</sup>: 312.0624; found: 312.0626.

### 2-(methylthio)-4-phenylpyrimido[1,2-b]indazole (3o)

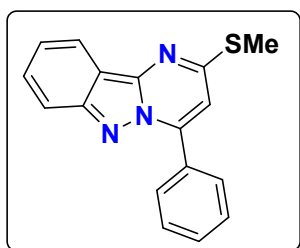

The reaction was performed following the general procedure. The residue was purified by flash column chromatograph (silica gel, petroleum ether:AcOEt = 40:1, v/v) to give the product as a yellow solid (51.8 mg, 89%). <sup>1</sup>H NMR (500 MHz, CDCl<sub>3</sub>) δ 8.28 (d, *J* = 8.3 Hz, 1H), 8.17 – 8.11 (m, 2H), 7.80 (d, *J* = 8.7 Hz, 1H), 7.65 – 7.60 (m, 3H), 7.59 – 7.55 (m, 1H), 7.27 – 7.22 (m, 1H), 7.12 (s, 1H), 2.81 (s, 3H). <sup>13</sup>C NMR (126 MHz, CDCl<sub>3</sub>) δ 157.4, 151.0, 144.7, 144.2, 131.1, 131.0, 129.5, 129.4, 128.7, 120.9, 120.2, 116.4, 112.4, 110.2, 13.1. HRMS (ESI, *m/z*) calcd for C<sub>17</sub>H<sub>14</sub>N<sub>3</sub>S [M+H]<sup>+</sup>: 292.0903; found: 292.0906.

### 9-fluoro-2-(methylthio)-4-phenylpyrimido[1,2-b]indazole (3p)

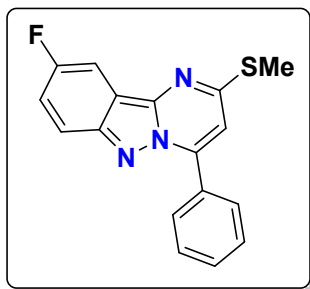

The reaction was performed following the general procedure. The residue was purified by flash column chromatograph (silica gel, petroleum ether:AcOEt = 40:1, v/v) to give the product as a yellow oil (46.9 mg, 76%). <sup>1</sup>H NMR (500 MHz, CDCl<sub>3</sub>) δ 8.12 – 8.05 (m, 2H), 7.82 (dd, *J* = 8.4, 2.4 Hz, 1H), 7.74 (dd, *J* = 9.3, 4.4 Hz, 1H), 7.63 – 7.56 (m, 3H), 7.33 (td, *J* = 9.2, 2.5 Hz, 1H), 7.07 (s, 1H), 2.77 (s, 3H). <sup>13</sup>C NMR (126 MHz, CDCl<sub>3</sub>) δ 157.2 (d, *J* = 240.7 Hz), 157.3, 148.1, 144.8 (d, *J* = 8.0 Hz), 144.4, 131.1, 130.9, 129.4, 128.8, 120.5 (d, *J* = 27.7 Hz), 118.4 (d, *J* = 9.0 Hz), 111.6 (d, *J* = 11.3 Hz), 110.3, 103.8 (d, *J* = 25.2 Hz), 13.1. HRMS (ESI, *m/z*) calcd for C<sub>17</sub>H<sub>13</sub>FN<sub>3</sub>S [M+H]<sup>+</sup>: 310.0809; found: 310.0814.

### 10-chloro-2-(methylthio)-4-phenylpyrimido[1,2-b]indazole (3q)

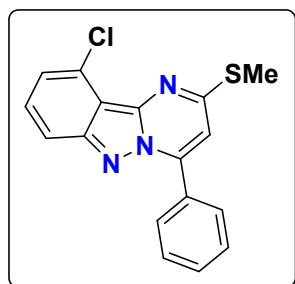

The reaction was performed following the general procedure. The residue was purified by flash column chromatograph (silica gel, petroleum ether:AcOEt = 40:1, v/v) to give the product as a yellow solid (41.6 mg, 64%). <sup>1</sup>H NMR (500 MHz, CDCl<sub>3</sub>) δ 8.12 – 8.04 (m, 2H), 7.65 (d, *J* = 8.6 Hz, 1H), 7.62 – 7.56 (m, 3H), 7.44 – 7.39 (m, 1H), 7.18 (d, *J* = 7.2 Hz, 1H), 7.14 (s, 1H), 2.82 (s, 3H). <sup>13</sup>C

NMR (126 MHz, CDCl<sub>3</sub>)  $\delta$  158.5, 151.7, 144.3, 144.1, 131.2, 130.9, 129.5, 129.5, 128.8, 127.8, 120.5, 115.1, 110.6, 110.1, 13.2. HRMS (ESI, m/z) calcd for C<sub>17</sub>H<sub>13</sub>ClN<sub>3</sub>S [M+H]<sup>+</sup>: 326.0513; found: 326.0516.

### 9-bromo-2-(methylthio)-4-phenylpyrimido[1,2-b]indazole (3r)

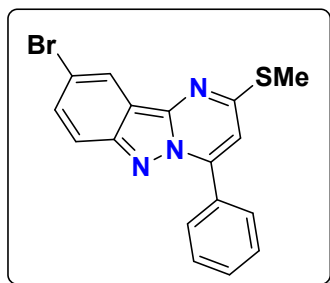

The reaction was performed following the general procedure. The residue was purified by flash column chromatograph (silica gel, petroleum ether:AcOEt = 50:1, v/v) to give the product as a yellow solid (50.9 mg, 69%). <sup>1</sup>H NMR (500 MHz, CDCl<sub>3</sub>)  $\delta$  8.41 (d, *J* = 1.3 Hz, 1H), 8.14 – 8.07 (m, 2H), 7.68 – 7.64 (m, 1H), 7.63 – 7.58 (m, 4H), 7.12 (s, 1H), 2.79 (s, 3H). <sup>13</sup>C NMR (126 MHz, CDCl<sub>3</sub>)  $\delta$  158.3, 149.3, 144.4, 143.9, 132.9, 131.2, 130.8,

129.5, 128.8, 123.2, 118.2, 113.6, 113.1, 110.7, 13.2. HRMS (ESI, m/z) calcd for C<sub>17</sub>H<sub>13</sub>BrN<sub>3</sub>S [M+H]<sup>+</sup>: 370.0008; found: 370.0008.

### 10-iodo-2-(methylthio)-4-phenylpyrimido[1,2-b]indazole (3s)

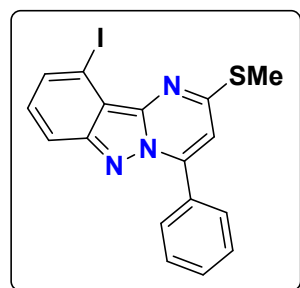

The reaction was performed following the general procedure. The residue was purified by flash column chromatograph (silica gel, petroleum ether:AcOEt = 40:1, v/v) to give the product as a yellow solid (59.1 mg, 71%). <sup>1</sup>H NMR (500 MHz, CDCl<sub>3</sub>)  $\delta$  8.10 – 8.03 (m, 2H), 7.74 (d, *J* = 8.6 Hz, 1H), 7.70 (d, *J* = 7.0 Hz, 1H), 7.62 – 7.56 (m, 3H), 7.21 (dd, *J* = 8.6, 7.1 Hz, 1H), 7.17 (s, 1H), 2.89 (s, 3H). <sup>13</sup>C NMR (126 MHz, CDCl<sub>3</sub>)  $\delta$  157.7, 151.3, 144.5,

144.3, 131.1, 130.9, 130.3, 129.4, 128.7, 116.4, 113.5, 110.8, 84.9, 13.9. HRMS (ESI, m/z) calcd for C<sub>17</sub>H<sub>13</sub>I N<sub>3</sub>S [M+H]<sup>+</sup>: 417.9869; found: 417.9871.

### 9-bromo-8-methyl-2-(methylthio)-4-phenylpyrimido[1,2-b]indazole (3t)

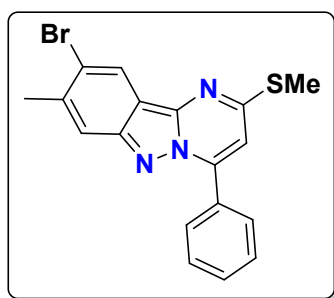

The reaction was performed following the general procedure. The residue was purified by flash column chromatograph (silica gel, petroleum ether:AcOEt = 50:1, v/v) to give the product as a yellow solid (55.9 mg, 73%). <sup>1</sup>H NMR (500 MHz, CDCl<sub>3</sub>)  $\delta$  8.12 – 8.06 (m, 2H), 8.05 (s, 1H), 8.02 (s, 1H), 7.61 – 7.55 (m, 3H), 7.07 (s, 1H), 2.76 (s, 3H), 2.56 (s, 3H). <sup>13</sup>C NMR (126 MHz, CDCl<sub>3</sub>)  $\delta$  157.8, 150.4, 144.3, 144.2, 131.1, 130.9, 129.5, 129.4,

128.8, 127.9, 120.7, 119.6, 111.7, 110.3, 23.4, 13.2. HRMS (ESI, m/z) calcd for C<sub>18</sub>H<sub>15</sub>BrN<sub>3</sub>S [M+H]<sup>+</sup>: 384.0165; found: 384.0170.

### 2-(methylthio)-4-phenyl-9-(trifluoromethyl)pyrimido[1,2-b]indazole (3u)

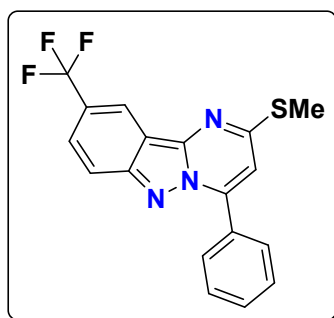

The reaction was performed following the general procedure. The residue was purified by flash column chromatograph (silica gel, petroleum ether:AcOEt = 50:1, v/v) to give the product as a yellow solid (89.3 mg, 83%). <sup>1</sup>H NMR (500 MHz, CDCl<sub>3</sub>)  $\delta$  8.57 (s, 1H), 8.09 (dd, *J* = 6.7, 3.0 Hz, 2H), 7.82 (d, *J* = 9.1 Hz, 1H), 7.68 (dd, *J* = 9.1, 1.6 Hz, 1H), 7.62 – 7.57 (m, 3H), 7.15 (s,

1H), 2.79 (s, 3H). <sup>13</sup>C NMR (126 MHz, CDCl<sub>3</sub>) δ 159.6, 151.2, 145.6, 144.7, 131.3, 130.6, 129.5, 128.8, 125.5 (q, *J* = 2.9 Hz), 124.9 (q, *J* = 272.5 Hz), 122.0 (q, *J* = 32.4 Hz), 119.8 (q, *J* = 4.8 Hz), 117.3, 111.2, 111.0, 13.2. HRMS (ESI, *m/z*) calcd for C<sub>18</sub>H<sub>13</sub>F<sub>3</sub>N<sub>3</sub>S [M+H]<sup>+</sup>: 360.0777; found: 360.0777.

### 8-methoxy-2-(methylthio)-4-phenylpyrimido[1,2-b]indazole (3v)

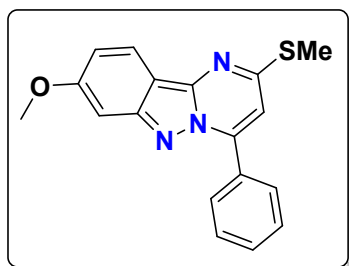

The reaction was performed following the general procedure. The residue was purified by flash column chromatograph (silica gel, petroleum ether:AcOEt = 50:1, v/v) to give the product as a yellow solid (43.0 mg, 67%). <sup>1</sup>H NMR (500 MHz, CDCl<sub>3</sub>) δ 8.12 – 8.05 (m, 3H), 7.57 (dd, *J* = 5.0, 1.7 Hz, 3H), 7.03 (d, *J* = 1.8 Hz, 1H), 6.99 (s, 1H), 6.88 (dd, *J* = 9.0, 2.1 Hz, 1H), 3.90 (s, 3H), 2.76 (s, 3H). <sup>13</sup>C NMR (126 MHz, CDCl<sub>3</sub>) δ 161.6, 157.7, 152.6, 144.6, 144.1, 131.3, 130.9, 129.4, 128.7, 121.7, 114.7, 108.9, 107.3, 94.0, 55.3, 13.1. HRMS (ESI, *m/z*) calcd for C<sub>18</sub>H<sub>16</sub>N<sub>3</sub>OS [M+H]<sup>+</sup>: 322.1009; found: 322.1013.

### 2-(methylthio)-4,8-diphenylpyrimido[1,2-b]indazole (3w)

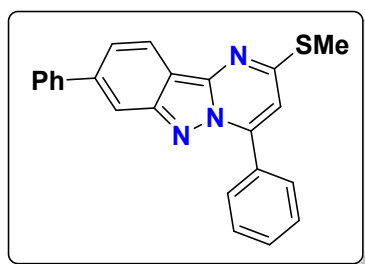

The reaction was performed following the general procedure. The residue was purified by flash column chromatograph (silica gel, petroleum ether:AcOEt = 50:1, v/v) to give the product as a yellow solid (65.1 mg, 89%). <sup>1</sup>H NMR (500 MHz, CDCl<sub>3</sub>) δ 8.30 (dd, *J* = 8.6, 0.5 Hz, 1H), 8.17 – 8.09 (m, 2H), 7.99 (s, 1H), 7.77 – 7.73 (m, 2H), 7.60 (dd, *J* = 5.1, 1.9 Hz, 3H), 7.52 – 7.46 (m, 3H), 7.39 (t, *J* = 7.4 Hz, 1H), 7.09 (s, 1H), 2.80 (s, 3H). <sup>13</sup>C NMR (126 MHz, CDCl<sub>3</sub>) δ 157.6, 151.5, 144.7, 144.2, 142.6, 141.6, 131.1, 131.0, 129.4, 128.8, 128.7, 127.6, 127.5, 121.2, 120.7, 114.1, 111.6, 110.1, 13.1. HRMS (ESI, *m/z*) calcd for C<sub>23</sub>H<sub>18</sub>N<sub>3</sub>S [M+H]<sup>+</sup>: 368.1216; found: 368.1216.

### 8-methyl-2-(methylthio)-4-phenylpyrimido[1,2-b]indazole (3t)

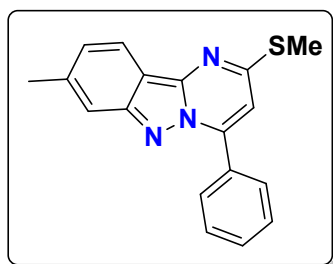

The reaction was performed following the general procedure. The residue was purified by flash column chromatograph (silica gel, petroleum ether:AcOEt = 40:1, v/v) to give the product as a yellow solid (45.8 mg, 75%). <sup>1</sup>H NMR (500 MHz, CDCl<sub>3</sub>) δ 8.17 – 8.09 (m, 3H), 7.61 (dd, *J* = 5.1, 1.9 Hz, 3H), 7.56 (s, 1H), 7.08 (s, 2H), 2.80 (s, 3H), 2.56 (s, 3H). <sup>13</sup>C NMR (126 MHz, CDCl<sub>3</sub>) δ 157.2, 151.7, 144.7, 144.2, 139.9, 131.3, 130.9, 129.4, 128.7, 123.0, 120.3, 115.0, 110.5, 109.7, 22.6, 13.1. HRMS (ESI, *m/z*) calcd for C<sub>18</sub>H<sub>16</sub>N<sub>3</sub>S [M+H]<sup>+</sup>: 306.1059; found: 306.1059.

### 2-(methylthio)-9-(naphthalen-2-ylmethoxy)-4-phenylpyrimido[1,2-b]indazole (3y)

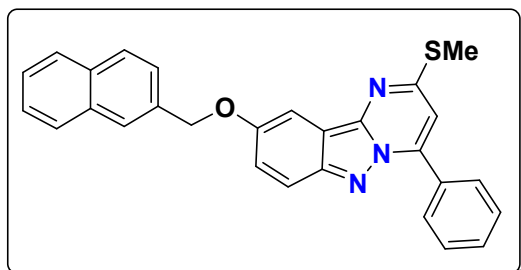

The reaction was performed following the general procedure. The residue was purified by flash column chromatograph (silica gel, petroleum ether:AcOEt = 5:1, v/v) to give the product as a yellow solid (44.7 mg, 50%). <sup>1</sup>H NMR (500 MHz, CDCl<sub>3</sub>) δ 8.16 (d, *J* = 8.9 Hz, 1H), 8.09 (dd,

*J* = 6.7, 3.0 Hz, 2H), 7.96 (s, 1H), 7.90 (d, *J* = 8.5 Hz, 1H), 7.87 (dd, *J* = 4.7, 2.2 Hz, 2H), 7.64 – 7.57 (m, 4H), 7.54 – 7.48 (m, 2H), 7.18 (d, *J* = 1.9 Hz, 1H), 7.06 (s, 1H), 7.02 (s, 1H), 5.35 (s, 2H), 2.79 (s, 3H). <sup>13</sup>C NMR (126 MHz, CDCl<sub>3</sub>) δ 160.6, 157.8, 152.58, 144.68, 144.18, 134.2, 133.3, 133.1, 131.2, 130.9, 129.4, 128.7, 128.4, 127.9, 127.7, 126.4, 126.2, 126.1, 125.3, 121.9, 115.0, 109.0, 107.5, 95.4, 70.1, 13.1. HRMS (ESI, *m/z*) calcd for C<sub>28</sub>H<sub>22</sub>N<sub>3</sub>OS [M+H]<sup>+</sup>: 448.1478; found: 448.1479.

### 8-(benzo[d][1,3]dioxol-5-yl)-2-(methylthio)-4-phenylpyrimido[1,2-b]indazole (3z)

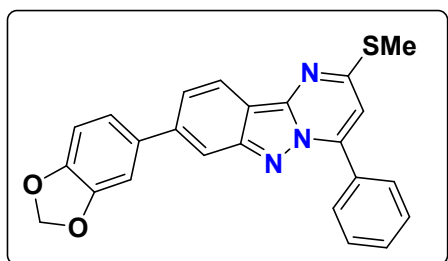

The reaction was performed following the general procedure. The residue was purified by flash column chromatograph (silica gel, petroleum ether:AcOEt = 20:1, v/v) to give the product as a yellow solid (57.5 mg, 70%). <sup>1</sup>H NMR (500 MHz, CDCl<sub>3</sub>) δ 8.27 (d, *J* = 8.6 Hz, 1H), 8.16 – 8.08 (m, 2H), 7.88 (s, 1H), 7.64 – 7.56 (m, 3H), 7.42 (dd, *J* = 8.6, 1.3 Hz, 1H),

7.24 – 7.17 (m, 2H), 7.09 (s, 1H), 6.92 (d, *J* = 8.5 Hz, 1H), 6.02 (s, 2H), 2.80 (s, 3H). <sup>13</sup>C NMR (126 MHz, CDCl<sub>3</sub>) δ 157.7, 151.6, 148.2, 147.3, 144.8, 144.3, 142.3, 136.0, 131.2, 131.1, 129.5, 128.8, 121.2, 121.2, 120.7, 113.6, 111.4, 110.1, 108.6, 108.1, 101.2, 13.2. HRMS (ESI, *m/z*) calcd for C<sub>24</sub>H<sub>18</sub>N<sub>3</sub>O<sub>2</sub>S [M+H]<sup>+</sup>: 412.1114; found: 412.117.

### (1S,2R,4S)-1,7,7-trimethylbicyclo[2.2.1]heptan-2-yl-2-(methylthio)-4-phenylpyrimido[1,2-b]indazole-8-carboxylate (3β)

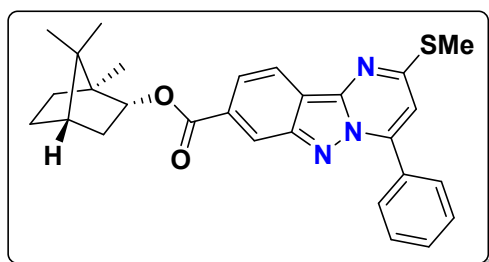

The reaction was performed following the general procedure. The residue was purified by flash column chromatograph (silica gel, petroleum ether:AcOEt = 30:1, v/v) to give the product as a yellow solid (64.5 mg, 69%). <sup>1</sup>H NMR (500 MHz, CDCl<sub>3</sub>) δ 8.61 (s, 1H), 8.29 (d, *J* = 8.6 Hz, 1H), 8.11 (dd, *J* =

6.7, 3.0 Hz, 2H), 7.88 (dd, *J* = 8.6, 1.2 Hz, 1H), 7.63 (dd, *J* = 5.0, 1.7 Hz, 3H), 7.15 (s, 1H), 5.25 – 5.16 (m, 1H), 2.81 (s, 3H), 2.58 – 2.50 (m, 1H), 2.31 – 2.20 (m, 1H), 1.88 – 1.81 (m, 1H), 1.78 (t, *J* = 4.4 Hz, 1H), 1.47 (ddd, *J* = 12.2, 4.3, 2.1 Hz, 1H), 1.39 – 1.34 (m, 1H), 1.21 (dd, *J* = 13.8, 3.4 Hz, 1H), 1.01 (s, 3H), 0.97 (d, *J* = 8.8 Hz, 6H). <sup>13</sup>C NMR (126 MHz, CDCl<sub>3</sub>) δ 167.1, 158.4, 150.1, 144.5, 144.5, 131.8, 131.2, 130.9, 129.5, 128.9, 121.0, 120.0, 119.7, 114.5, 111.0, 80.8, 77.3, 77.1, 49.2, 47.9, 45.1, 37.0,

28.1, 27.5, 19.8, 19.0, 13.7, 13.2. HRMS (ESI, m/z) calcd for C<sub>28</sub>H<sub>30</sub>N<sub>3</sub>O<sub>2</sub>S [M+H]<sup>+</sup>: 472.2053; found: 472.2059.

### 2-(1,1-bis(ethylthio)-3-oxo-3-phenylprop-1-en-2-yl)benzonitrile (4a)

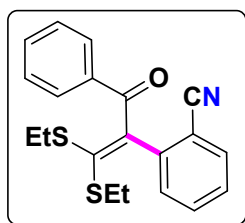

The reaction was performed following the general procedure. The residue was purified by flash column chromatograph (silica gel, petroleum ether:AcOEt = 80:1, v/v) to give the product as a yellow oil (40.9 mg, 58%). <sup>1</sup>H NMR (500 MHz, CDCl<sub>3</sub>) δ 8.17 – 8.09 (m, 2H), 7.73 – 7.67 (m, 1H), 7.60 – 7.53 (m, 3H), 7.51 – 7.46 (m, 2H), 7.41 – 7.36 (m, 1H), 2.86 (q, *J* = 7.4 Hz, 2H), 2.79 (q, *J* = 7.4 Hz, 2H), 1.22 (t, *J* = 7.4 Hz, 3H), 1.19 (t, *J* = 7.4 Hz, 3H). <sup>13</sup>C NMR (126 MHz, CDCl<sub>3</sub>) δ 194.1, 142.6, 141.1, 140.1, 136.3, 133.5, 133.0, 132.5, 129.6, 129.6, 128.7, 128.2, 118.6, 113.4, 28.8, 28.2, 14.6, 14.6. HRMS (ESI, m/z) calcd for C<sub>20</sub>H<sub>20</sub>NOS<sub>2</sub> [M+H]<sup>+</sup>: 354.0981; found: 354.0982.

### 2-(1,1-bis(ethylthio)-3-(4-fluorophenyl)-3-oxoprop-1-en-2-yl)benzonitrile (4b)

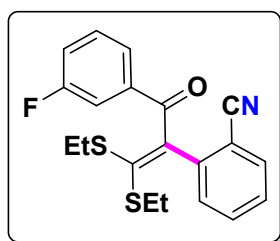

The reaction was performed following the general procedure. The residue was purified by flash column chromatograph (silica gel, petroleum ether:AcOEt = 80:1, v/v) to give the product as a yellow oil (39.3 mg, 53%). <sup>1</sup>H NMR (500 MHz, CDCl<sub>3</sub>) δ 7.95 (d, *J* = 7.8 Hz, 1H), 7.83 – 7.77 (m, 1H), 7.73 (d, *J* = 7.7 Hz, 1H), 7.58 (dd, *J* = 4.9, 1.2 Hz, 2H), 7.49 (td, *J* = 8.0, 5.5 Hz, 1H), 7.42 (ddd, *J* = 7.9, 5.2, 3.6 Hz, 1H), 7.30 – 7.25 (m, 1H), 2.88 (q, *J* = 7.4 Hz, 2H), 2.82 (q, *J* = 7.4 Hz, 2H), 1.24 (t, *J* = 7.4 Hz, 3H), 1.21 (t, *J* = 7.4 Hz, 3H). <sup>13</sup>C NMR (126 MHz, CDCl<sub>3</sub>) δ 192.9, 162.9 (d, *J* = 248.3 Hz), 142.6, 141.7, 140.1, 138.7 (d, *J* = 6.5 Hz), 133.1, 132.6, 130.4 (d, *J* = 7.6 Hz), 129.8, 128.4, 125.5 (d, *J* = 2.9 Hz), 120.5 (d, *J* = 21.6 Hz), 118.5, 115.8 (d, *J* = 22.5 Hz), 113.5, 29.0, 28.3, 14.6, 14.5. HRMS (ESI, m/z) calcd for C<sub>20</sub>H<sub>19</sub>NOFS<sub>2</sub> [M+H]<sup>+</sup>: 372.0887; found: 372.0890.

### 2-(3-(3-chlorophenyl)-1,1-bis(ethylthio)-3-oxoprop-1-en-2-yl)benzonitrile (4c)

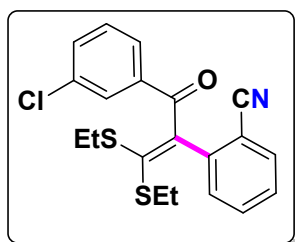

The reaction was performed following the general procedure. The residue was purified by flash column chromatograph (silica gel, petroleum ether:AcOEt = 80:1, v/v) to give the product as a yellow oil (42.6 mg, 55%). <sup>1</sup>H NMR (500 MHz, CDCl<sub>3</sub>) δ 8.08 (t, *J* = 1.8 Hz, 1H), 8.01 (d, *J* = 7.8 Hz, 1H), 7.70 (d, *J* = 7.7 Hz, 1H), 7.57 – 7.51 (m, 3H), 7.45 – 7.38 (m, 2H), 2.88 – 2.83 (m, 2H), 2.80 (q, *J* = 7.4 Hz, 2H), 1.22 (t, *J* = 6.7 Hz, 3H), 1.19 (t, *J* = 6.7 Hz, 3H). <sup>13</sup>C NMR (126 MHz, CDCl<sub>3</sub>) δ 192.8, 142.8, 141.6, 140.1, 138.1, 135.0, 133.3, 133.0, 132.6, 130.0, 129.7, 129.2, 128.4, 127.7, 118.5, 113.5, 29.0, 28.3, 14.6, 14.5. HRMS (ESI, m/z) calcd for C<sub>20</sub>H<sub>19</sub>NOCIS<sub>2</sub> [M+H]<sup>+</sup>: 388.0591; found: 388.0597.

#### 2-(3-(3-bromophenyl)-1,1-bis(ethylthio)-3-oxoprop-1-en-2-yl)benzonitrile (4d)

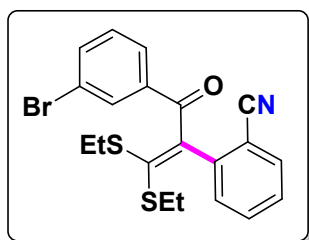

The reaction was performed following the general procedure. The residue was purified by flash column chromatograph (silica gel, petroleum ether:AcOEt = 80:1, v/v) to give the product as a yellow solid (41.3 mg, 48%). <sup>1</sup>H NMR (500 MHz, CDCl<sub>3</sub>) δ 8.26 (t, *J* = 1.8 Hz, 1H), 8.11 – 8.06 (m, 1H), 7.75 – 7.68 (m, 2H), 7.61 – 7.55 (m, 2H), 7.45 – 7.41 (m, 1H), 7.39 (t, *J* = 7.9 Hz, 1H), 2.91 – 2.85 (m, 2H), 2.82 (t, *J* = 7.4 Hz, 2H), 1.24 (t, *J* = 5.6 Hz, 3H), 1.21 (t, *J* = 5.6 Hz, 3H). <sup>13</sup>C NMR (126 MHz, CDCl<sub>3</sub>) δ 192.7, 142.8, 141.5, 140.1, 138.3, 136.2, 133.1, 132.6, 132.2, 130.3, 129.8, 128.4, 128.2, 123.1, 118.5, 113.5, 29.0, 28.4, 14.6, 14.6. HRMS (ESI, m/z) calcd for C<sub>20</sub>H<sub>19</sub>NOBrS<sub>2</sub> [M+H]<sup>+</sup>: 432.0086; found: 432.0089.

#### 2-(1,1-bis(ethylthio)-3-oxo-3-(4-(trifluoromethyl)phenyl)prop-1-en-2-yl)benzonitrile (4e)

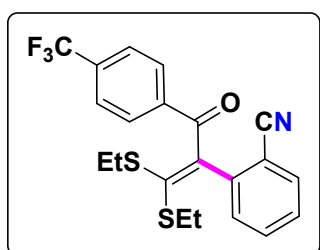

The reaction was performed following the general procedure. The residue was purified by flash column chromatograph (silica gel, petroleum ether:AcOEt = 80:1, v/v) to give the product as a yellow oil (37.0 mg, 44%). <sup>1</sup>H NMR (500 MHz, CDCl<sub>3</sub>) δ 8.22 (d, *J* = 8.2 Hz, 2H), 7.75 (d, *J* = 8.3 Hz, 2H), 7.71 (d, *J* = 7.6 Hz, 1H), 7.59 – 7.53 (m, 2H), 7.43 – 7.40 (m, 1H), 2.85 (q, *J* = 7.4 Hz, 2H), 2.79 (q, *J* = 7.4 Hz, 2H), 1.22 (t, *J* = 7.4 Hz, 3H), 1.16 (t, *J* = 7.4 Hz, 3H). <sup>13</sup>C NMR (126 MHz, CDCl<sub>3</sub>) δ 193.1, 143.6, 141.3, 140.1, 139.5, 134.5 (q, *J* = 32.8 Hz), 133.1, 132.7, 129.9, 129.8, 128.5, 125.8 (q, *J* = 3.8 Hz), 123.6 (q, *J* = 273.4 Hz), 118.6, 113.4, 29.1, 28.4, 14.7, 14.5. HRMS (ESI, m/z) calcd for C<sub>21</sub>H<sub>19</sub>NOF<sub>3</sub>S<sub>2</sub> [M+H]<sup>+</sup>: 422.0855; found: 422.0855.

#### 2-(3-([1,1'-biphenyl]-4-yl)-1,1-bis(ethylthio)-3-oxoprop-1-en-2-yl)benzonitrile (4f)

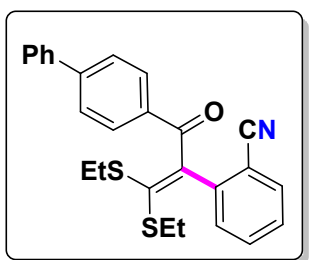

The reaction was performed following the general procedure. The residue was purified by flash column chromatograph (silica gel, petroleum ether:AcOEt = 80:1, v/v) to give the product as a yellow solid (50.6 mg, 59%). <sup>1</sup>H NMR (500 MHz, CDCl<sub>3</sub>) δ 8.26 – 8.18 (m, 2H), 7.77 – 7.69 (m, 3H), 7.66 – 7.59 (m, 3H), 7.55 (td, *J* = 7.7, 1.3 Hz, 1H), 7.46 (t, *J* = 7.5 Hz, 2H), 7.42 – 7.35 (m, 2H), 2.89 (q, *J* = 7.4 Hz, 2H), 2.83 (q, *J* = 7.4 Hz, 2H), 1.26 – 1.24 (m, 3H), 1.24 – 1.21 (m, 3H). <sup>13</sup>C NMR (126 MHz, CDCl<sub>3</sub>) δ 193.7, 146.2, 142.7, 140.7, 140.1, 139.8, 134.9, 133.0, 132.5, 130.2, 129.6, 128.9, 128.3, 127.4, 127.2, 118.7, 113.4, 28.8, 28.2, 14.7, 14.6. HRMS (ESI, m/z) calcd for C<sub>26</sub>H<sub>24</sub>NOS<sub>2</sub> [M+H]<sup>+</sup>: 430.1294; found: 430.1298.



## 2-(1,1-bis(ethylthio)-3-(4-(methylthio)phenyl)-3-oxoprop-1-en-2-yl)benzonitrile

(4g)

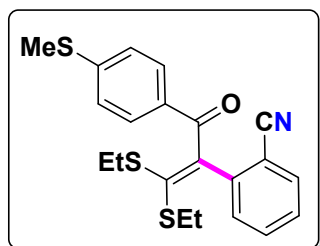

The reaction was performed following the general procedure. The residue was purified by flash column chromatograph (silica gel, petroleum ether:AcOEt = 80:1, v/v) to give the product as a yellow oil (45.5 mg, 57%). <sup>1</sup>H NMR (500 MHz, CDCl<sub>3</sub>) δ 8.04 (d, *J* = 8.5 Hz, 2H), 7.71 – 7.65 (m, 1H), 7.60 – 7.56 (m, 1H), 7.53 (td, *J* = 7.7, 1.2 Hz, 1H), 7.41 – 7.34 (m, 1H), 7.28 (d, *J* = 8.5 Hz, 2H), 2.83 (dq, *J* = 28.1, 7.4 Hz, 4H), 2.50 (s, 3H), 1.22 (td, *J* = 7.4, 2.9 Hz, 6H). <sup>13</sup>C NMR (126 MHz, CDCl<sub>3</sub>) δ 193.2, 146.9, 142.8, 140.3, 140.1, 133.0, 132.5, 132.4, 130.1, 129.6, 128.3, 125.1, 118.7, 113.3, 28.8, 28.2, 14.8, 14.7, 14.6. HRMS (ESI, *m/z*) calcd for C<sub>21</sub>H<sub>22</sub>NOS<sub>3</sub> [M+H]<sup>+</sup>: 400.0858; found: 400.0859.

## 2-(1,1-bis(ethylthio)-3-(4-methoxyphenyl)-3-oxoprop-1-en-2-yl)benzonitrile (4h)

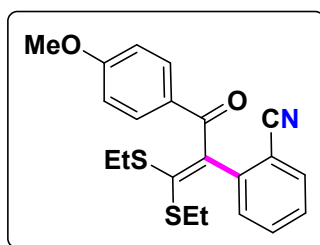

The reaction was performed following the general procedure. The residue was purified by flash column chromatograph (silica gel, petroleum ether:AcOEt = 60:1, v/v) to give the product as a yellow oil (49.8 mg, 65%). <sup>1</sup>H NMR (500 MHz, CDCl<sub>3</sub>) δ 8.14 (d, *J* = 8.8 Hz, 2H), 7.71 (d, *J* = 7.7 Hz, 1H), 7.62 (d, *J* = 7.8 Hz, 1H), 7.58 – 7.52 (m, 1H), 7.43 – 7.36 (m, 1H), 6.99 (d, *J* = 8.8 Hz, 2H), 3.88 (s, 3H), 2.86 (dq, *J* = 28.7, 7.4 Hz, 4H), 1.25 (dt, *J* = 14.5, 6.3 Hz, 6H). <sup>13</sup>C NMR (126 MHz, CDCl<sub>3</sub>) δ 192.8, 164.1, 143.2, 140.2, 139.5, 133.0, 132.5, 132.1, 129.6, 129.0, 128.2, 118.8, 114.1, 113.2, 55.5, 28.7, 28.1, 14.8, 14.6. HRMS (ESI, *m/z*) calcd for C<sub>21</sub>H<sub>22</sub>NO<sub>2</sub>S<sub>2</sub> [M+H]<sup>+</sup>: 384.1086; found: 384.1090.

## 2-(1,1-bis(ethylthio)-3-oxo-3-(p-tolyl)prop-1-en-2-yl)benzonitrile (4i)

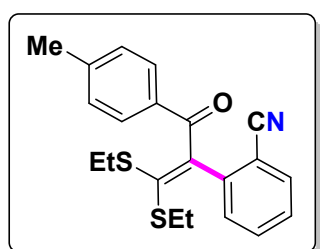

The reaction was performed following the general procedure. The residue was purified by flash column chromatograph (silica gel, petroleum ether:AcOEt = 80:1, v/v) to give the product as a yellow oil (44.0 mg, 60%). <sup>1</sup>H NMR (500 MHz, CDCl<sub>3</sub>) δ 8.03 (d, *J* = 8.2 Hz, 2H), 7.68 (d, *J* = 6.9 Hz, 1H), 7.57 (dd, *J* = 7.9, 0.9 Hz, 1H), 7.52 (td, *J* = 7.7, 1.3 Hz, 1H), 7.37 (td, *J* = 7.6, 1.4 Hz, 1H), 7.29 (d, *J* = 8.0 Hz, 2H), 2.86 (q, *J* = 7.4 Hz, 2H), 2.80 (q, *J* = 7.4 Hz, 2H), 2.40 (s, 3H), 1.22 (td, *J* = 7.4, 3.0 Hz, 6H). <sup>13</sup>C NMR (126 MHz, CDCl<sub>3</sub>) δ 193.7, 144.6, 142.9, 140.1, 140.1, 133.6, 133.0, 132.4, 129.8, 129.5, 129.5, 128.2, 118.6, 113.3, 28.7, 28.1, 21.7, 14.7, 14.6. HRMS (ESI, *m/z*) calcd for C<sub>21</sub>H<sub>22</sub>NOS<sub>2</sub> [M+H]<sup>+</sup>: 368.1137; found: 368.1137.

### 2-(1,1-bis(ethylthio)-3-oxo-3-(thiophen-2-yl)prop-1-en-2-yl)benzonitrile (4j)

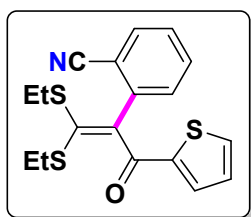

The reaction was performed following the general procedure. The residue was purified by flash column chromatograph (silica gel, petroleum ether:AcOEt = 80:1, v/v) to give the product as a yellow oil (35.1 mg, 49%). <sup>1</sup>H NMR (500 MHz, CDCl<sub>3</sub>) δ 7.98 (dd, *J* = 3.8, 0.7 Hz, 1H), 7.69 (t, *J* = 5.2 Hz, 2H), 7.60 (d, *J* = 7.3 Hz, 1H), 7.55 (td, *J* = 7.7, 1.0 Hz, 1H), 7.39 (td, *J* = 7.5, 1.0 Hz, 1H), 7.14 (dd, *J* = 4.6, 4.1 Hz, 1H), 2.89 – 2.84 (m, 2H), 2.84 – 2.79 (m, 2H), 1.24 (d, *J* = 7.4 Hz, 3H), 1.21 (t, *J* = 6.1 Hz, 3H). <sup>13</sup>C NMR (126 MHz, CDCl<sub>3</sub>) δ 186.3, 143.7, 142.3, 141.1, 139.7, 135.2, 134.8, 132.9, 132.6, 129.6, 128.5, 128.3, 118.6, 113.3, 28.8, 28.1, 14.7, 14.6. HRMS (ESI, *m/z*) calcd for C<sub>18</sub>H<sub>18</sub>NOS<sub>3</sub> [M+H]<sup>+</sup>: 360.0545; found: 360.0548.

### 2-(1,1-bis(methylthio)-3-oxo-3-phenylprop-1-en-2-yl)benzonitrile (4k)

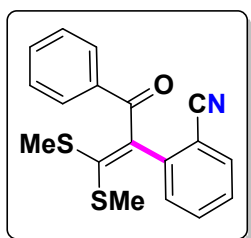

The reaction was performed following the general procedure. The residue was purified by flash column chromatograph (silica gel, petroleum ether:AcOEt = 70:1, v/v) to give the product as a yellow oil (36.4 mg, 56%). <sup>1</sup>H NMR (500 MHz, CDCl<sub>3</sub>) δ 8.14 – 8.04 (m, 2H), 7.73 – 7.68 (m, 1H), 7.59 – 7.47 (m, 5H), 7.40 – 7.35 (m, 1H), 2.42 (s, 3H), 2.25 (s, 3H). <sup>13</sup>C NMR (126 MHz, CDCl<sub>3</sub>) δ 193.9, 144.2, 140.4, 140.0, 136.5, 133.4, 133.2, 132.6, 129.6, 129.5, 128.8, 128.2, 118.6, 113.1, 17.5, 16.6. HRMS (ESI, *m/z*) calcd for C<sub>18</sub>H<sub>16</sub>NOS<sub>2</sub> [M+H]<sup>+</sup>: 326.0668; found: 326.0670.

### 2-(1,1-bis(methylthio)-3-oxoferrocen-1-en-2-yl)benzonitrile (4l)

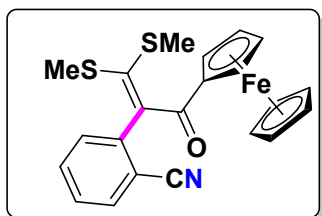

The reaction was performed following the general procedure. The residue was purified by flash column chromatograph (silica gel, petroleum ether:AcOEt = 70:1, v/v) to give the product as a rufous solid (43.4 mg, 50%). <sup>1</sup>H NMR (500 MHz, CDCl<sub>3</sub>) δ 7.88 (d, *J* = 8.0 Hz, 1H), 7.84 (d, *J* = 7.7 Hz, 1H), 7.68 (td, *J* = 7.8, 1.2 Hz, 1H), 7.47 (td, *J* = 7.6, 1.1 Hz, 1H), 4.98 (d, *J* = 29.5 Hz, 2H), 4.61 (d, *J* = 33.2 Hz, 2H), 3.79 (s, 5H), 2.39 (s, 3H), 2.29 (s, 3H). <sup>13</sup>C NMR (126 MHz, CDCl<sub>3</sub>) δ 198.5, 142.0, 140.9, 140.8, 132.6, 132.5, 128.9, 128.3, 118.9, 112.9, 79.0, 73.2, 72.9, 71.7, 69.9, 68.4, 17.3, 16.4. HRMS (ESI, *m/z*) calcd for C<sub>22</sub>H<sub>20</sub>FeNOS<sub>2</sub> [M+H]<sup>+</sup>: 434.0030; found: 434.0034.

### 2-(1,1-bis(methylthio)-3-oxo-3-phenylprop-1-en-2-yl)-4-methylbenzonitrile (4m)

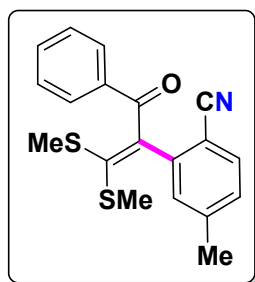

The reaction was performed following the general procedure. The residue was purified by flash column chromatograph (silica gel, petroleum ether:AcOEt = 70:1, v/v) to give the product as a white solid (42.7 mg, 63%). <sup>1</sup>H NMR (500 MHz, CDCl<sub>3</sub>) δ 8.13 – 8.06 (m, 2H), 7.60 – 7.54 (m, 2H), 7.53 – 7.47 (m, 2H), 7.31 (s, 1H), 7.19 – 7.15 (m, 1H), 2.42 (s, 3H), 2.36 (s, 3H), 2.25 (s, 3H). <sup>13</sup>C NMR (126 MHz, CDCl<sub>3</sub>) δ 194.0, 143.7, 143.6, 140.4, 140.1, 136.5, 133.4, 133.1, 130.2, 129.5, 129.1,

128.8, 118.8, 110.0, 21.8, 17.5, 16.6. HRMS (ESI, m/z) calcd for C<sub>19</sub>H<sub>18</sub>NOS<sub>2</sub> [M+H]<sup>+</sup>: 340.0824; found: 340.0825.

**2-(1,1-bis(methylthio)-3-oxo-3-phenylprop-1-en-2-yl)-[1,1'-biphenyl]-4-carbonitrile (4n)**

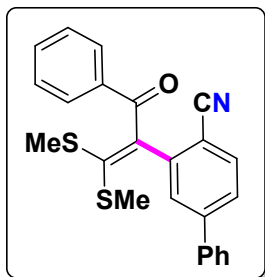

The reaction was performed following the general procedure. The residue was purified by flash column chromatograph (silica gel, petroleum ether:AcOEt = 70:1, v/v) to give the product as a yellow solid (48.1 mg, 60%). <sup>1</sup>H NMR (500 MHz, CDCl<sub>3</sub>) δ 8.16 – 8.10 (m, 2H), 7.77 (d, *J* = 8.2 Hz, 1H), 7.75 (d, *J* = 1.7 Hz, 1H), 7.62 – 7.54 (m, 4H), 7.53 – 7.48 (m, 2H), 7.47 – 7.42 (m, 2H), 7.42 – 7.37 (m, 1H), 2.45 (s, 3H), 2.28 (s, 3H). <sup>13</sup>C NMR (126 MHz, CDCl<sub>3</sub>) δ 193.9, 145.5, 144.2, 140.7,

140.1, 138.7, 136.5, 133.6, 133.5, 129.5, 129.0, 128.8, 128.7, 128.2, 127.3, 126.8, 118.7, 111.4, 17.5, 16.6. HRMS (ESI, m/z) calcd for C<sub>24</sub>H<sub>20</sub>NOS<sub>2</sub> [M+H]<sup>+</sup>: 402.0981; found: 402.0984.

**2-(1,1-bis(methylthio)-3-oxoferrocen-1-en-2-yl)-4-(trifluoromethyl)benzonitrile (4o)**

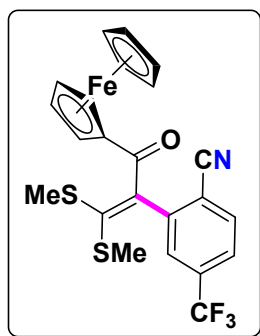

The reaction was performed following the general procedure. The residue was purified by flash column chromatograph (silica gel, petroleum ether:AcOEt = 70:1, v/v) to give the product as a rufous solid (38.1 mg, 38%). <sup>1</sup>H NMR (500 MHz, CDCl<sub>3</sub>) δ 8.05 (dd, *J* = 1.2, 0.4 Hz, 1H), 8.02 (d, *J* = 8.3 Hz, 1H), 7.89 (dd, *J* = 8.3, 1.4 Hz, 1H), 4.96 – 4.91 (m, 2H), 4.62 (d, *J* = 43.1 Hz, 2H), 3.78 (s, 5H), 2.39 (s, 3H), 2.28 (s, 3H). <sup>13</sup>C NMR (126 MHz, CDCl<sub>3</sub>) δ 197.5, 144.2, 143.1, 140.2, 130.6 (q, *J* = 34.0 Hz), 129.8, 129.4 (q, *J* = 3.8 Hz), 129.2 (q,

*J* = 3.8 Hz), 122.8 (q, *J* = 273.4 Hz), 117.7, 113.8, 79.1, 73.5, 73.2, 71.7, 70.0, 68.6, 17.4, 16.4. HRMS (ESI, m/z) calcd for C<sub>23</sub>H<sub>19</sub>F<sub>3</sub>FeNOS<sub>2</sub> [M+H]<sup>+</sup>: 502.0204; found: 502.0206.

**2-(1,1-bis(methylthio)-3-oxoferrocen-1-en-2-yl)-6-chlorobenzonitrile (4p)**

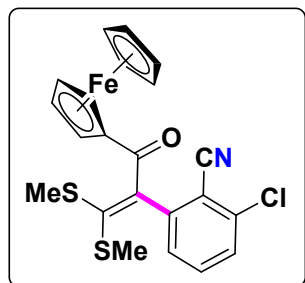

The reaction was performed following the general procedure. The residue was purified by flash column chromatograph (silica gel, petroleum ether:AcOEt = 70:1, v/v) to give the product as a rufous solid (38.2 mg, 41%). <sup>1</sup>H NMR (500 MHz, CDCl<sub>3</sub>) δ 7.77 (d, *J* = 7.9 Hz, 1H), 7.58 (t, *J* = 8.0 Hz, 1H), 7.49 (d, *J* = 8.1 Hz, 1H), 4.96 (d, *J* = 37.8 Hz, 2H), 4.61 (d, *J* = 38.2 Hz, 2H), 3.79 (s, 5H), 2.39 (s, 3H), 2.27 (s, 3H). <sup>13</sup>C NMR (126 MHz, CDCl<sub>3</sub>) δ

198.0, 143.0, 142.0, 141.0, 137.2, 133.1, 128.9, 127.1, 116.1, 113.6, 79.0, 73.4, 73.1, 72.0, 70.0, 68.4, 17.4, 16.4. HRMS (ESI, m/z) calcd for C<sub>22</sub>H<sub>18</sub>ClFeNNaOS<sub>2</sub> [M+Na]<sup>+</sup>: 489.9760; found: 489.9765.

### 2-(5-(ethylthio)-3-(thiophen-2-yl)-1H-pyrazol-4-yl)benzonitrile (**5**)

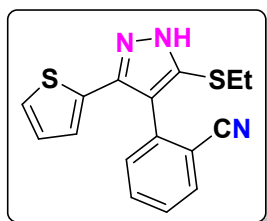

In a sealed tube were placed **4j** (0.15 mmol, 1 equiv), hydrazine hydrate (0.45 mmol, 3 equiv) in EtOH (1 mL). The resulting mixture was stirred at reflux for overnight. Upon completion of the reaction. The residue was purified by flash column chromatograph (silica gel, petroleum ether:AcOEt = 2:1, v/v) to give the product as a yellow solid (42.4 mg, 91%).

$^1\text{H}$  NMR (500 MHz,  $\text{CDCl}_3$ )  $\delta$  11.22 (brs, 1H), 7.77 (dd,  $J = 7.8, 0.9$  Hz, 1H), 7.66 (td,  $J = 7.7, 1.4$  Hz, 1H), 7.52 (td,  $J = 7.7, 1.2$  Hz, 1H), 7.48 (dd,  $J = 7.8, 0.6$  Hz, 1H), 7.22 (dd,  $J = 5.1, 1.1$  Hz, 1H), 6.92 (dd,  $J = 5.0, 3.7$  Hz, 1H), 6.86 (d,  $J = 3.0$  Hz, 1H), 2.77 (qd,  $J = 7.2, 2.9$  Hz, 2H), 1.20 (t,  $J = 7.4$  Hz, 3H).  $^{13}\text{C}$  NMR (126 MHz,  $\text{CDCl}_3$ )  $\delta$  136.3, 133.3, 132.7, 132.5, 128.5, 127.4, 125.9, 125.5, 117.8, 114.6, 29.5, 15.1. HRMS (ESI,  $m/z$ ) calcd for  $\text{C}_{16}\text{H}_{14}\text{N}_3\text{S}_2$   $[\text{M}+\text{Na}]^+$ : 312.0624; found: 324.0626.

## 6. NMR spectroscopic data

### 2-(ethylthio)-4-phenylpyrimido[1,2-b]indazole (3a)

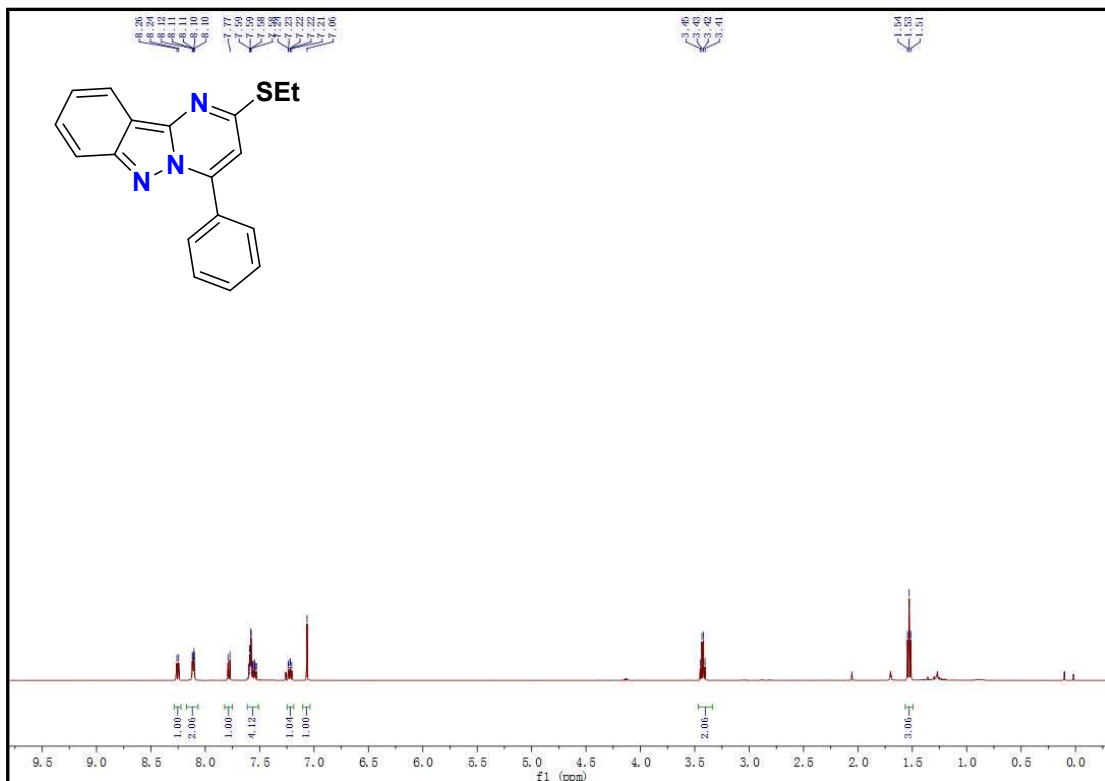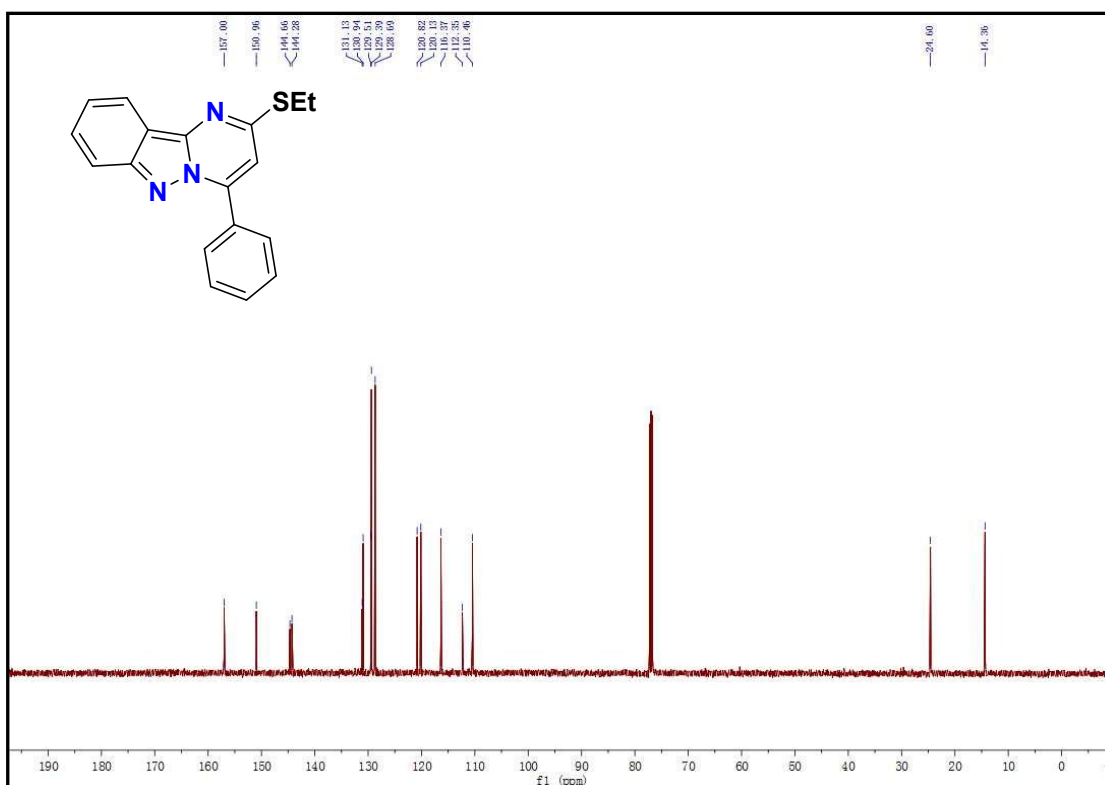

## 2-(ethylthio)-4-(p-tolyl)pyrimido[1,2-b]indazole (3b)

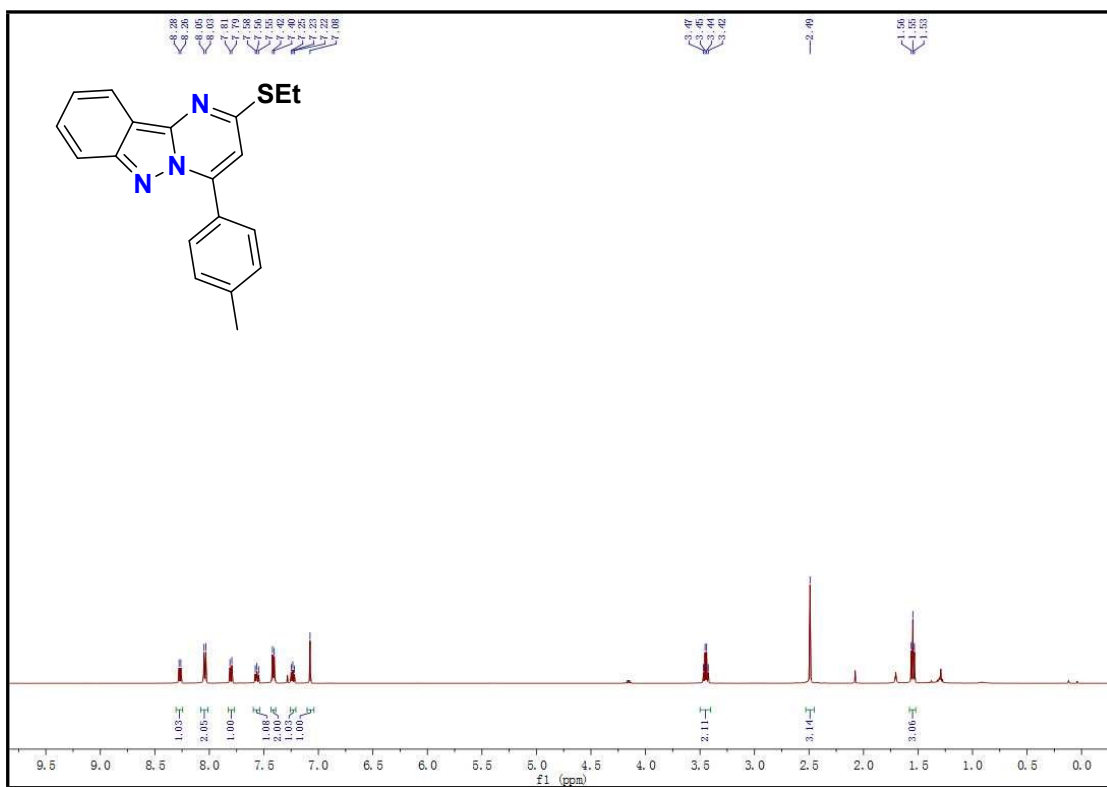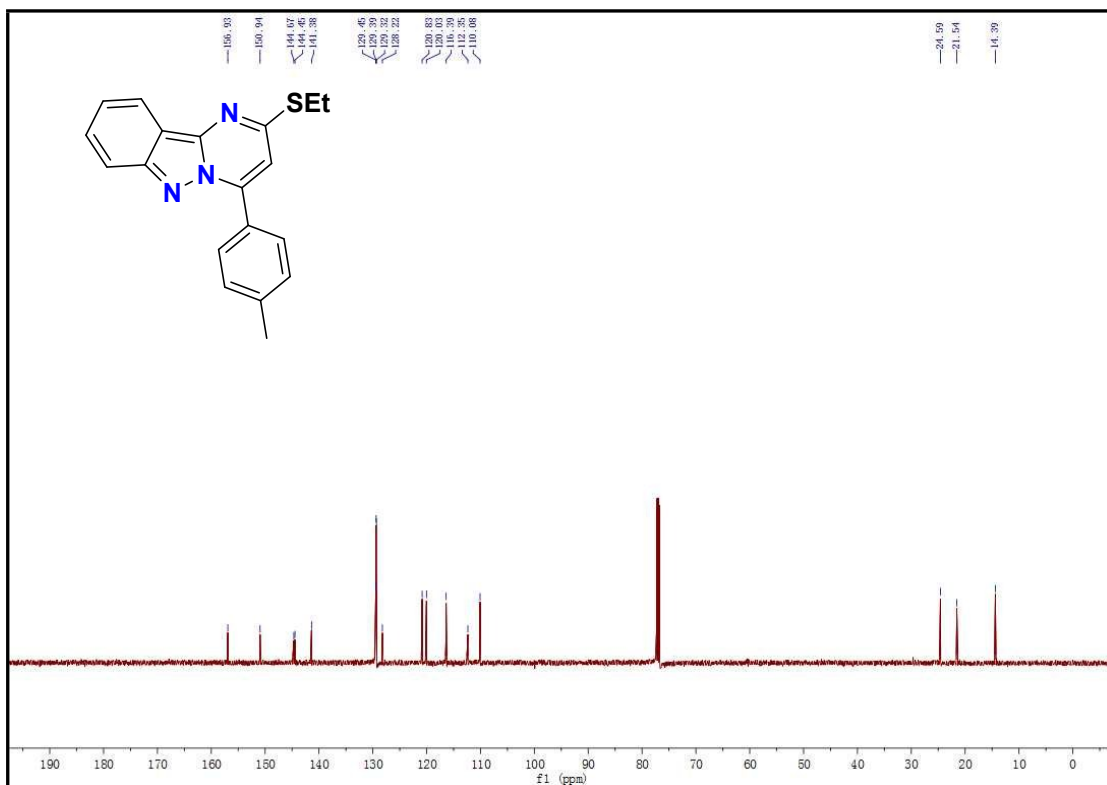

### 4-(4-ethylphenyl)-2-(ethylthio)pyrimido[1,2-b]indazole (3c)

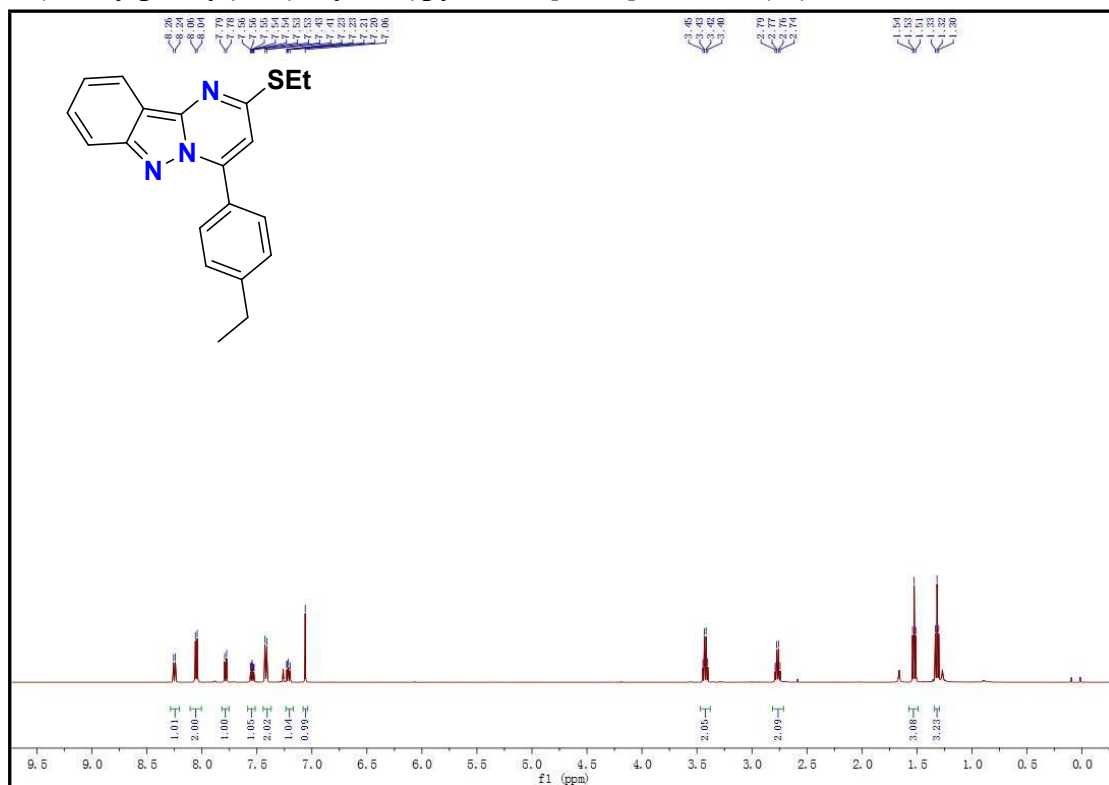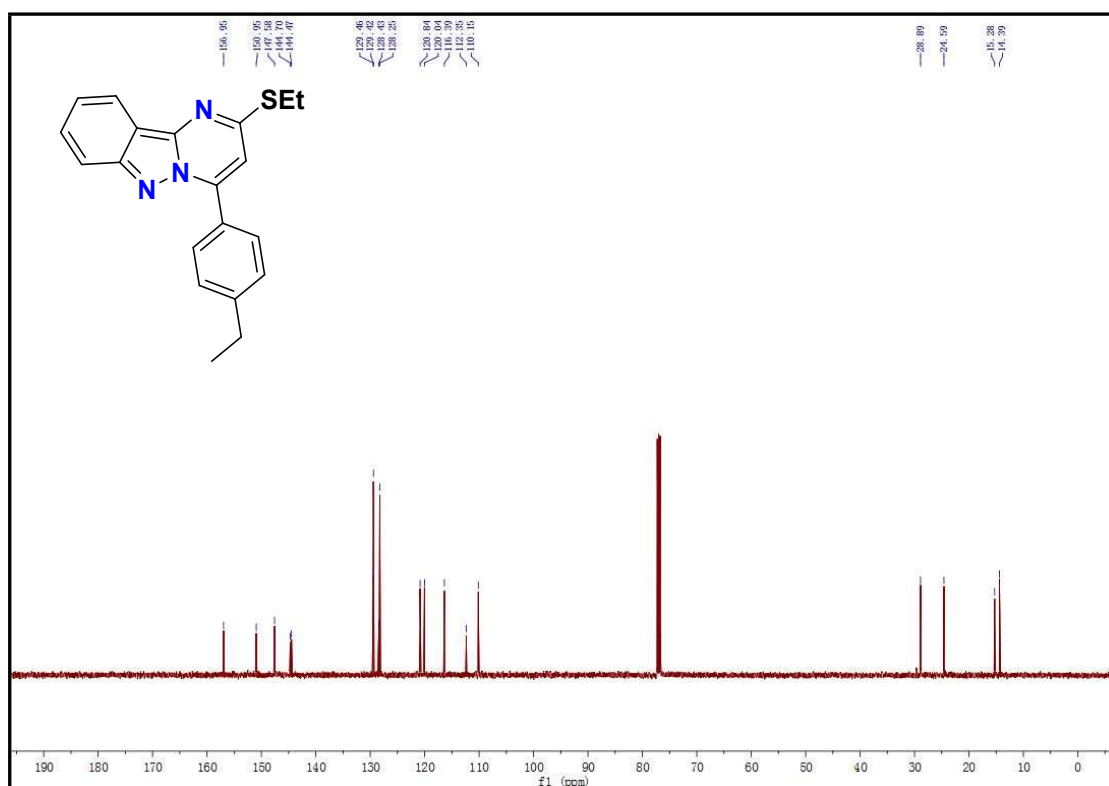

2-(ethylthio)-4-(4-isopropylphenyl)pyrimido[1,2-b]indazole (3d)

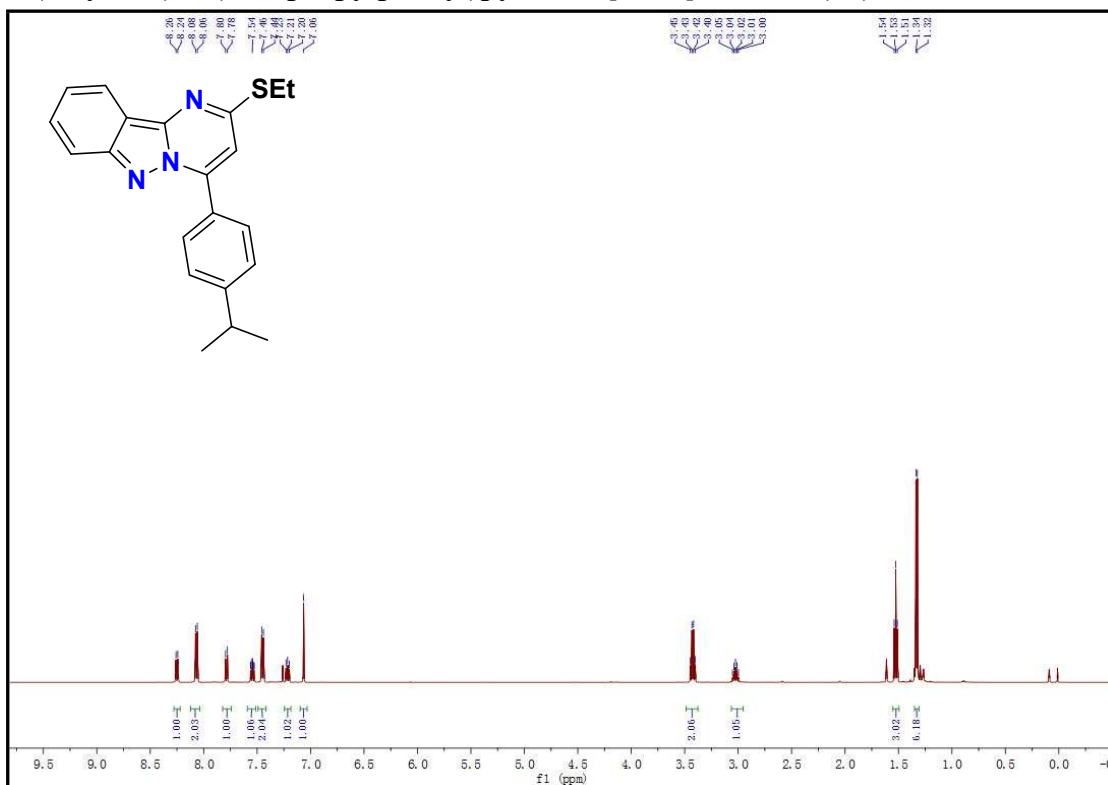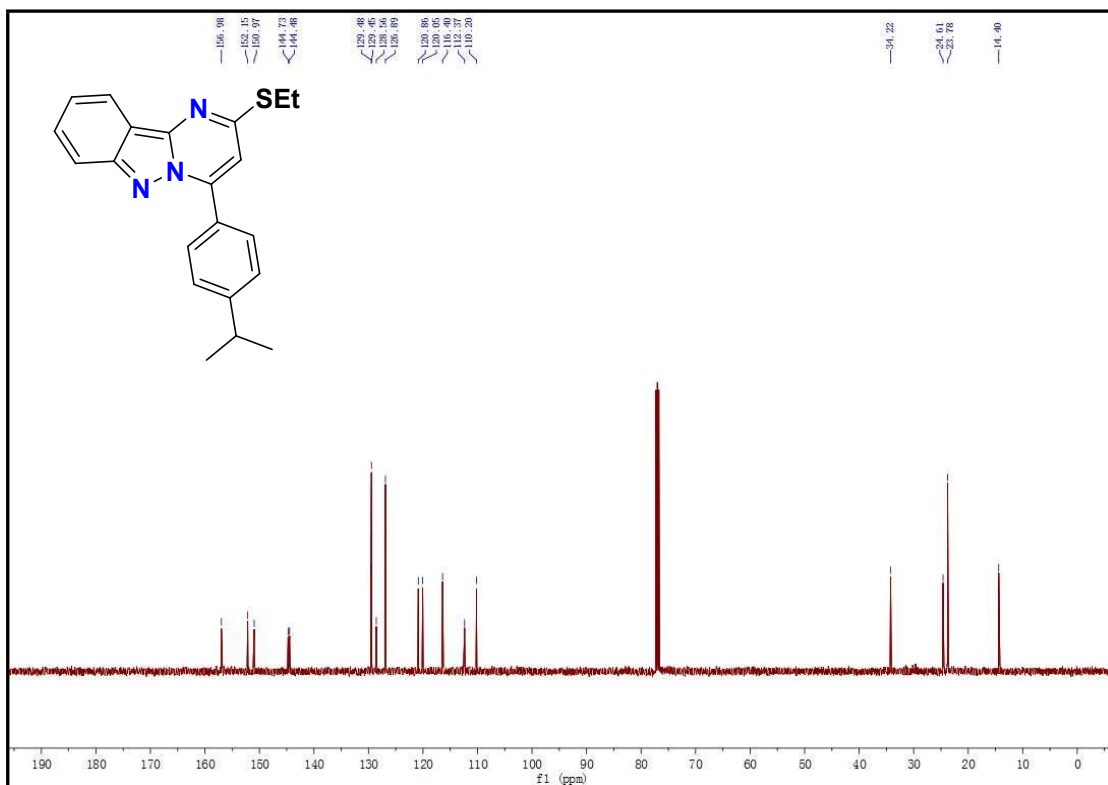



### 2-(ethylthio)-4-(4-methoxyphenyl)pyrimido[1,2-b]indazole (3e)

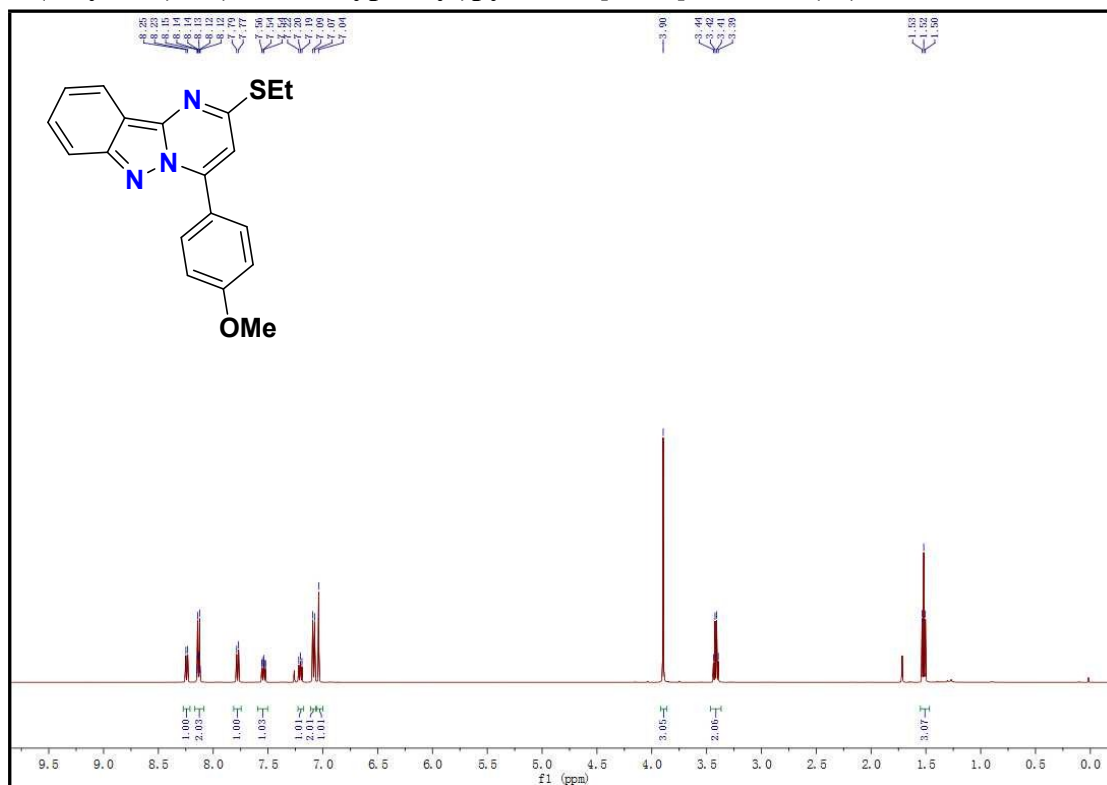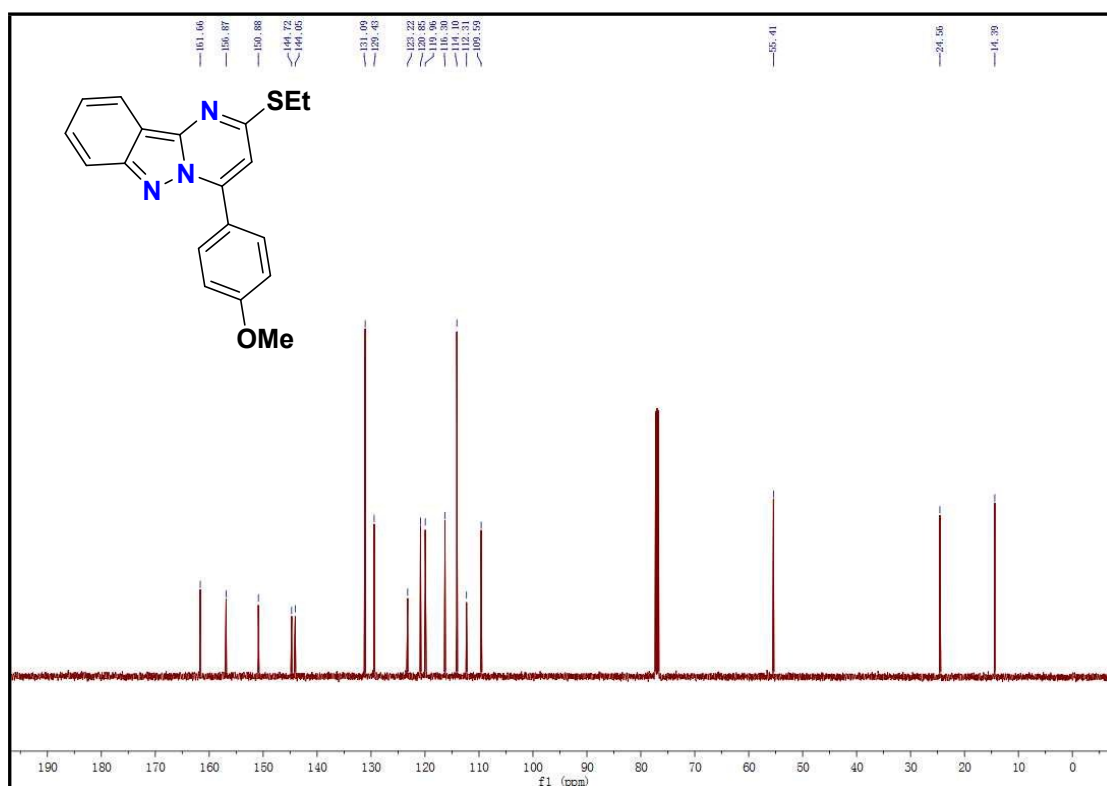

### 4-(2-(ethylthio)pyrimido[1,2-b]indazol-4-yl)-N,N-dimethylaniline (3f)

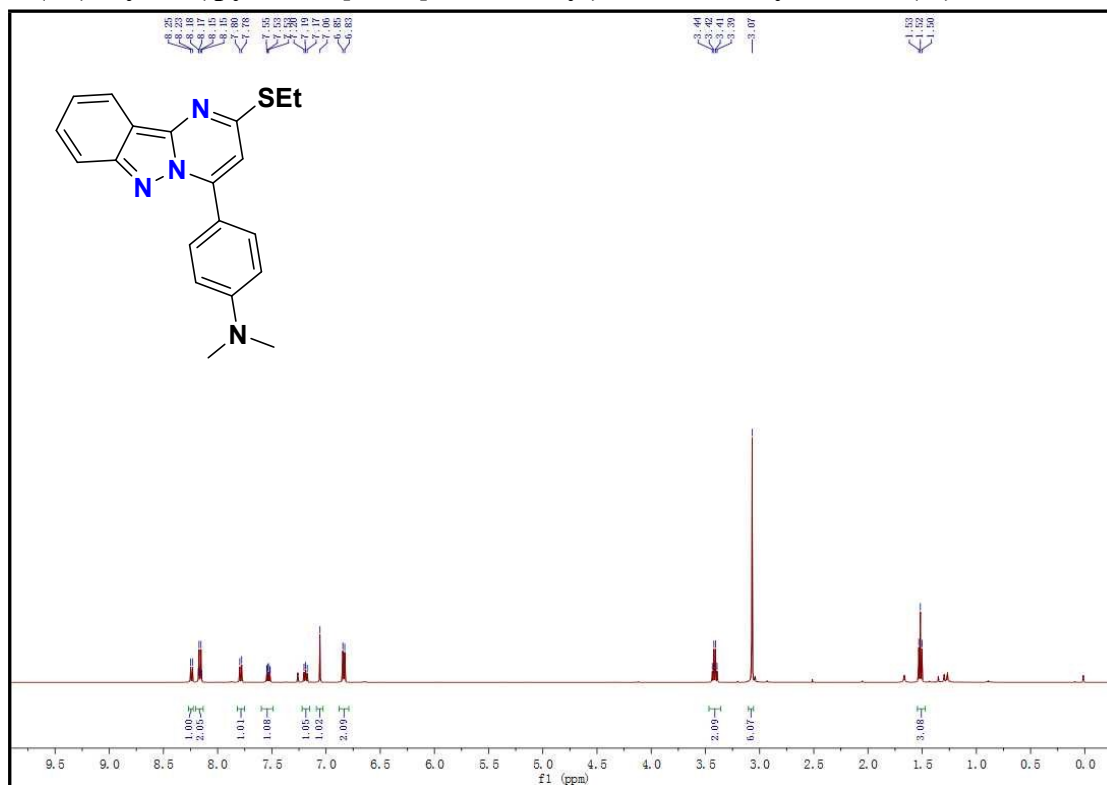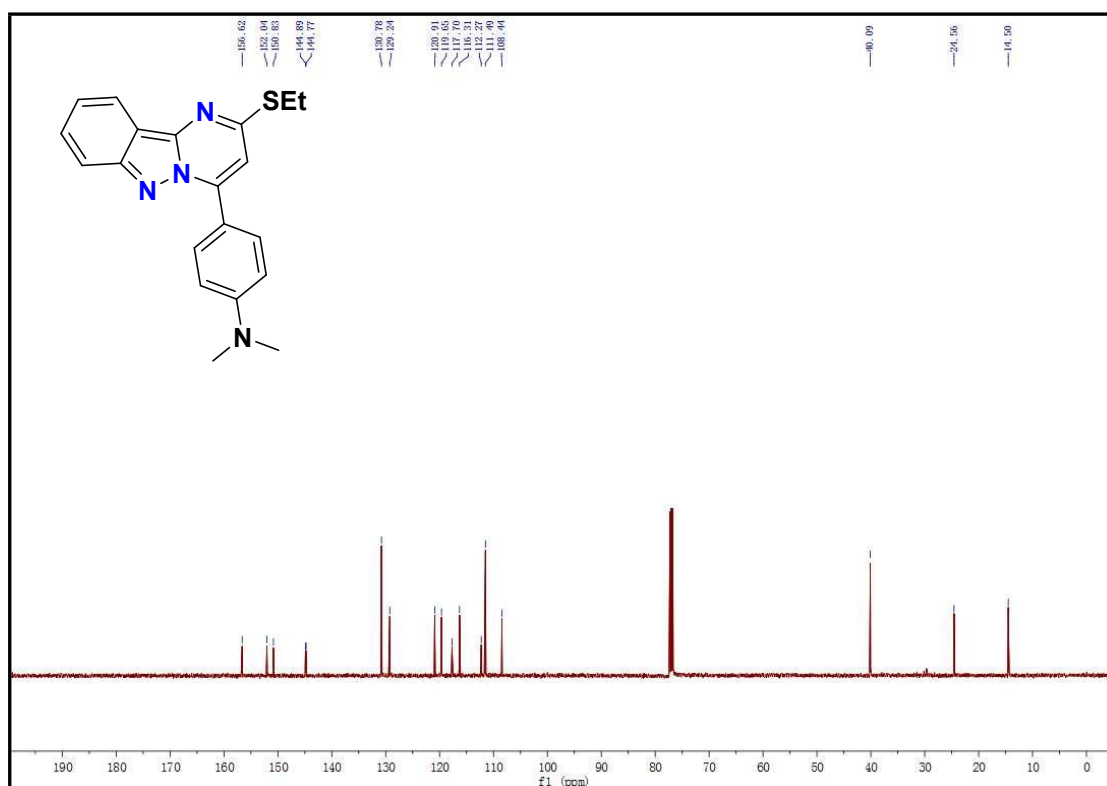

### 4-(2,4-dimethoxyphenyl)-2-(ethylthio)pyrimido[1,2-b]indazole (3g)

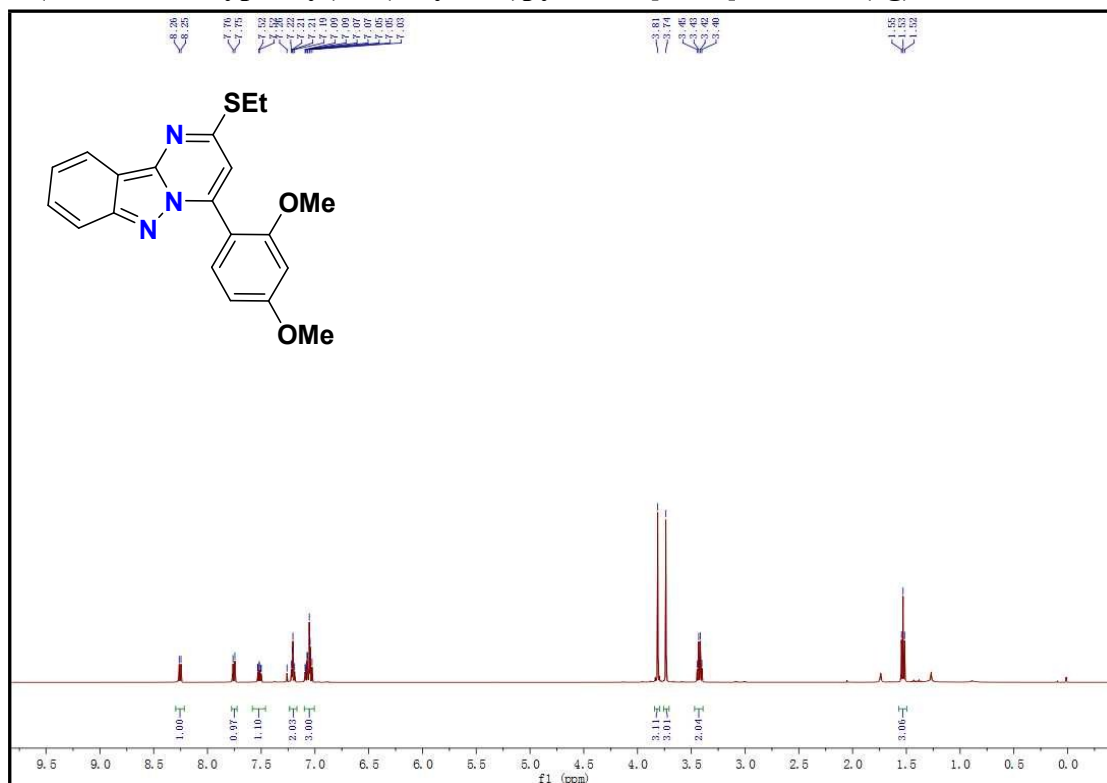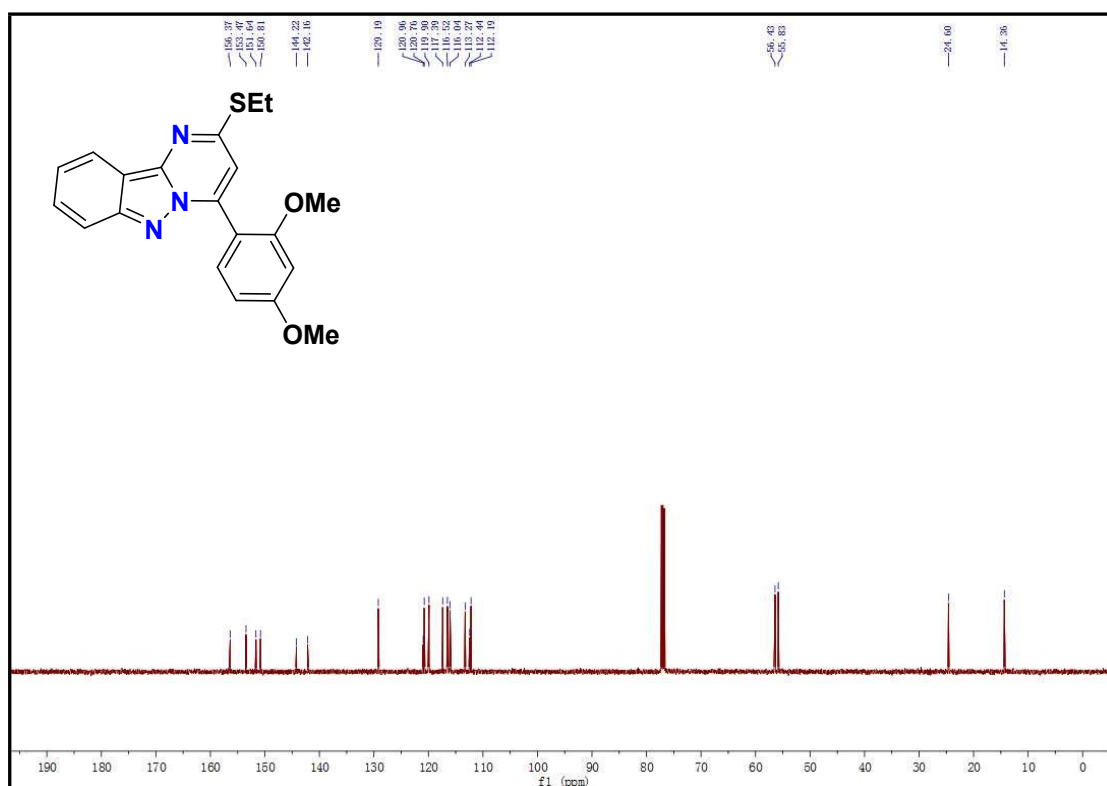

### 2-(ethylthio)-4-(3-fluorophenyl)pyrimido[1,2-b]indazole (3h)

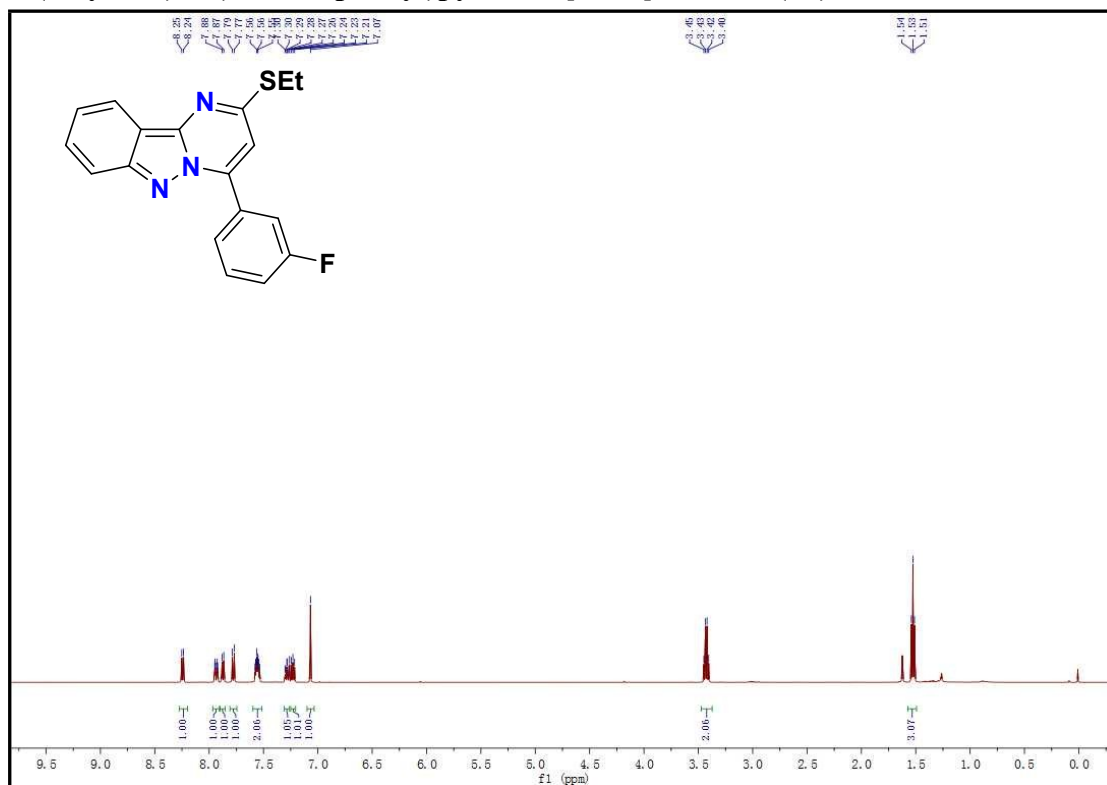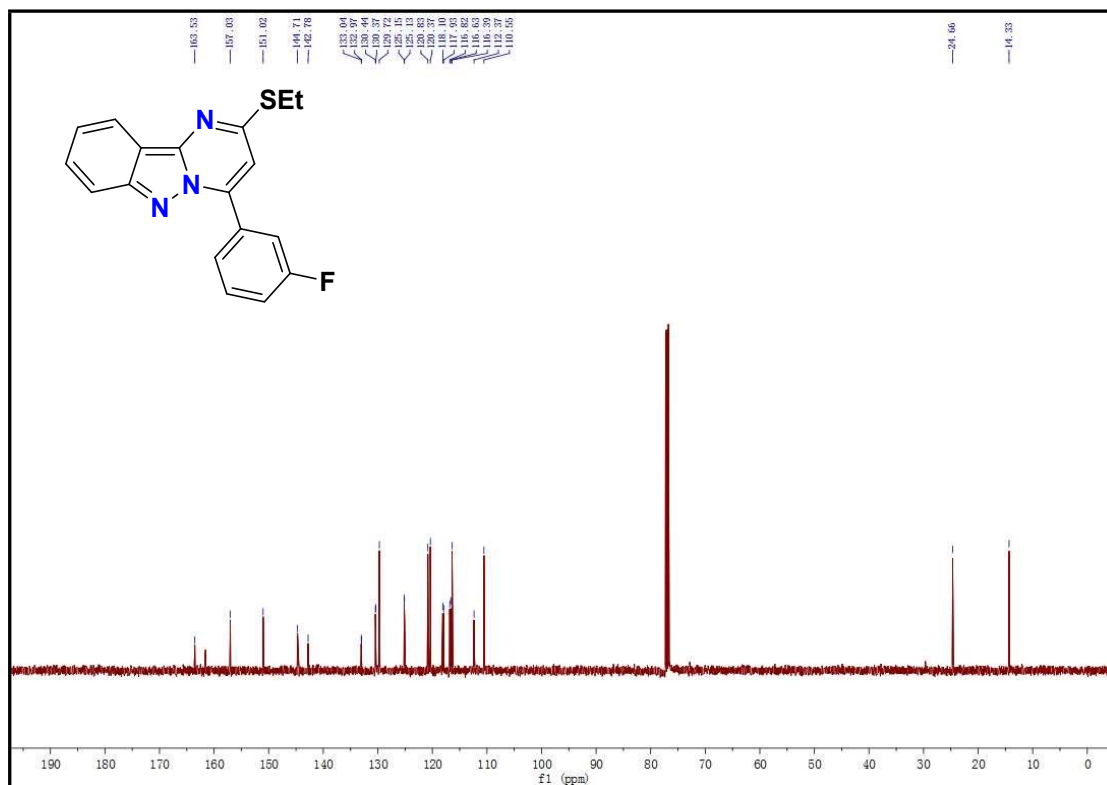

### 4-(3-chlorophenyl)-2-(ethylthio)pyrimido[1,2-b]indazole (3i)

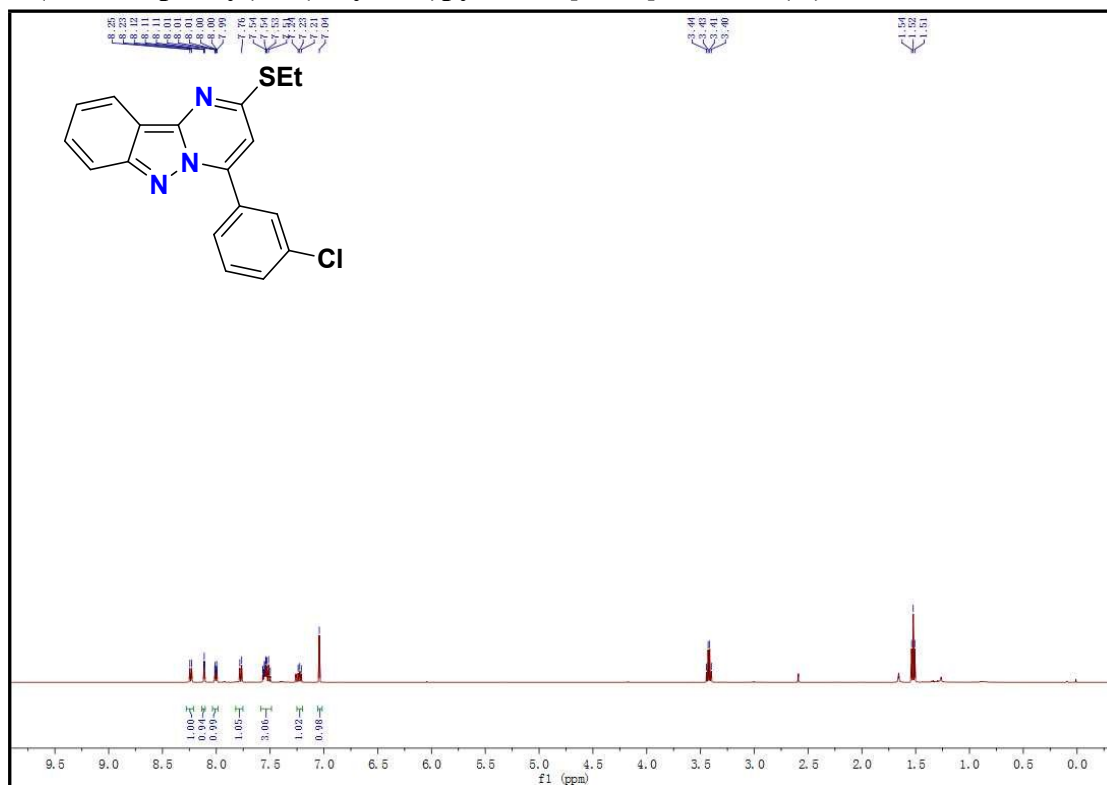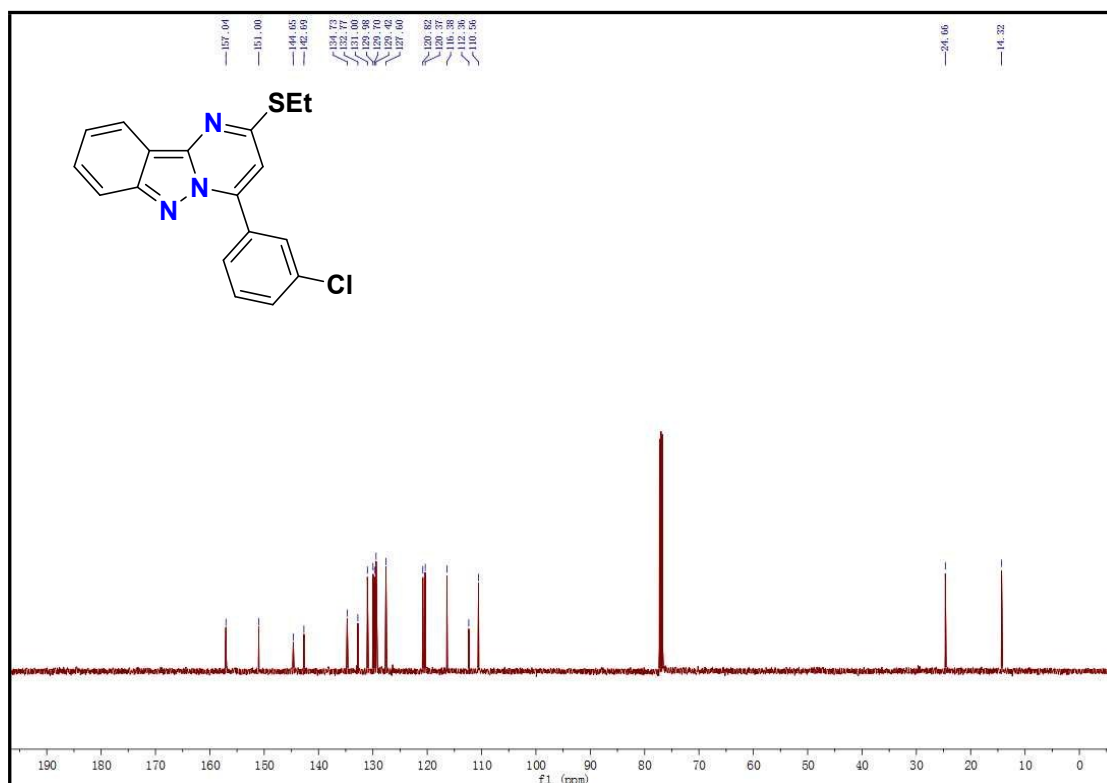



2-(ethylthio)-4-(4-(trifluoromethyl)phenyl)pyrimido[1,2-b]indazole (3k)

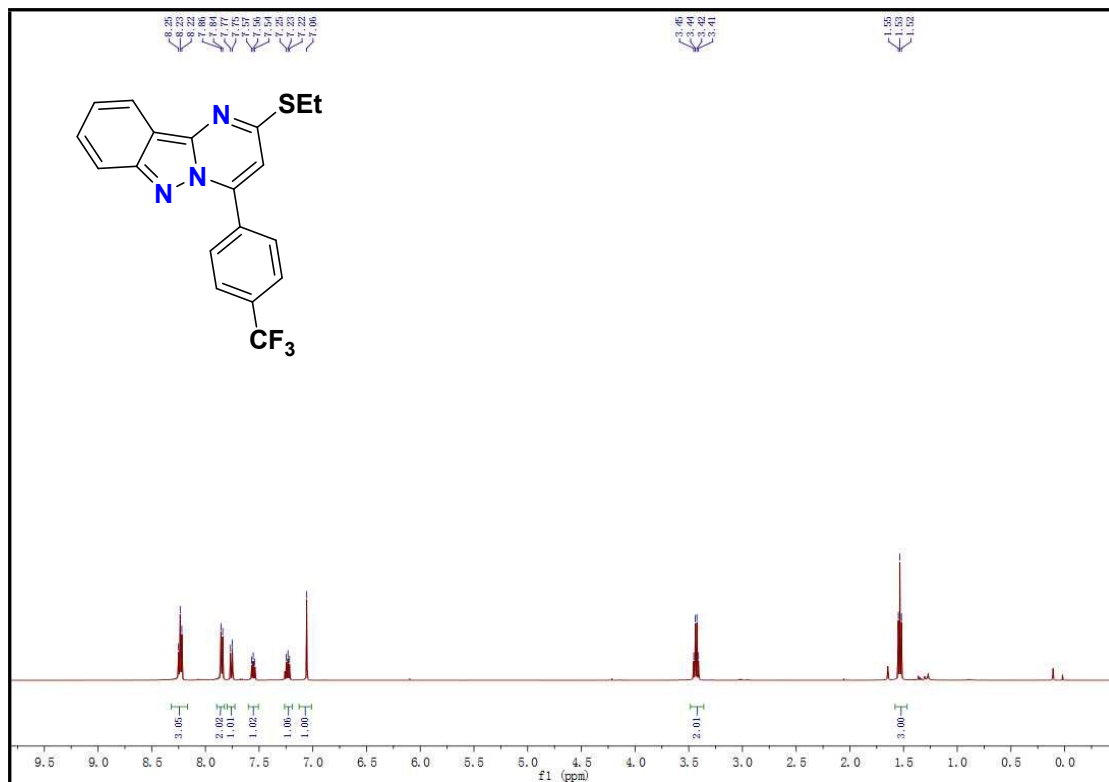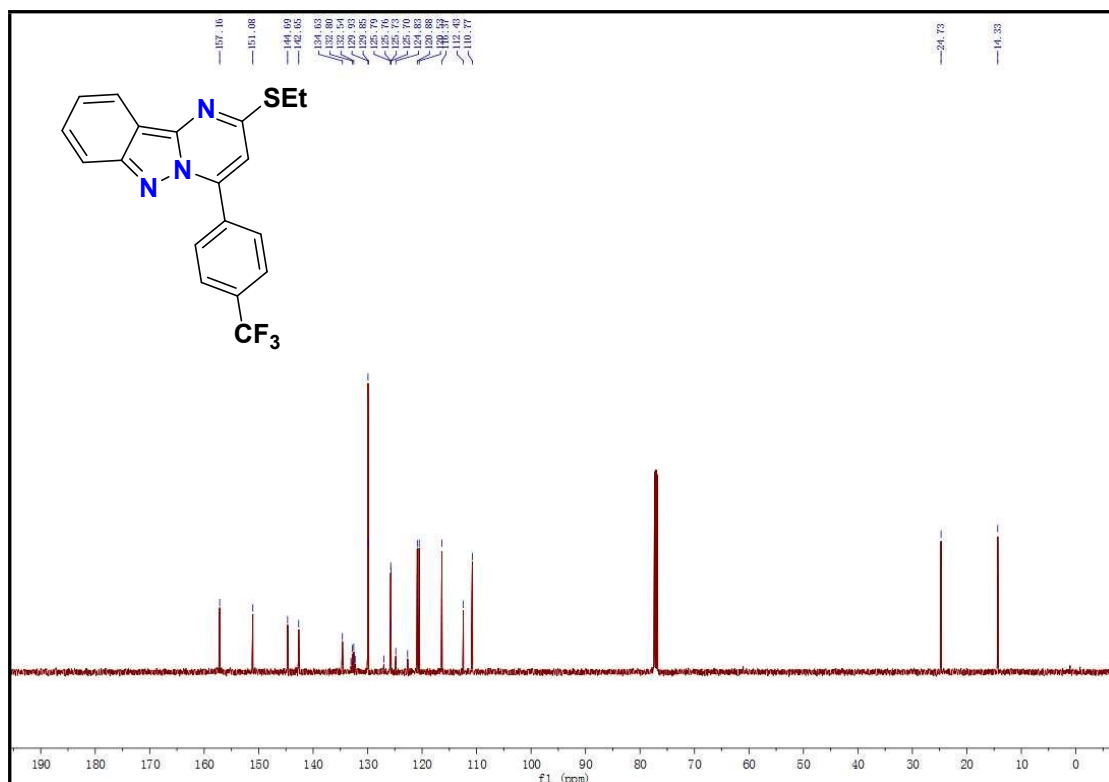

### 2-(ethylthio)-4-(naphthalen-2-yl)pyrimido[1,2-b]indazole (3l)

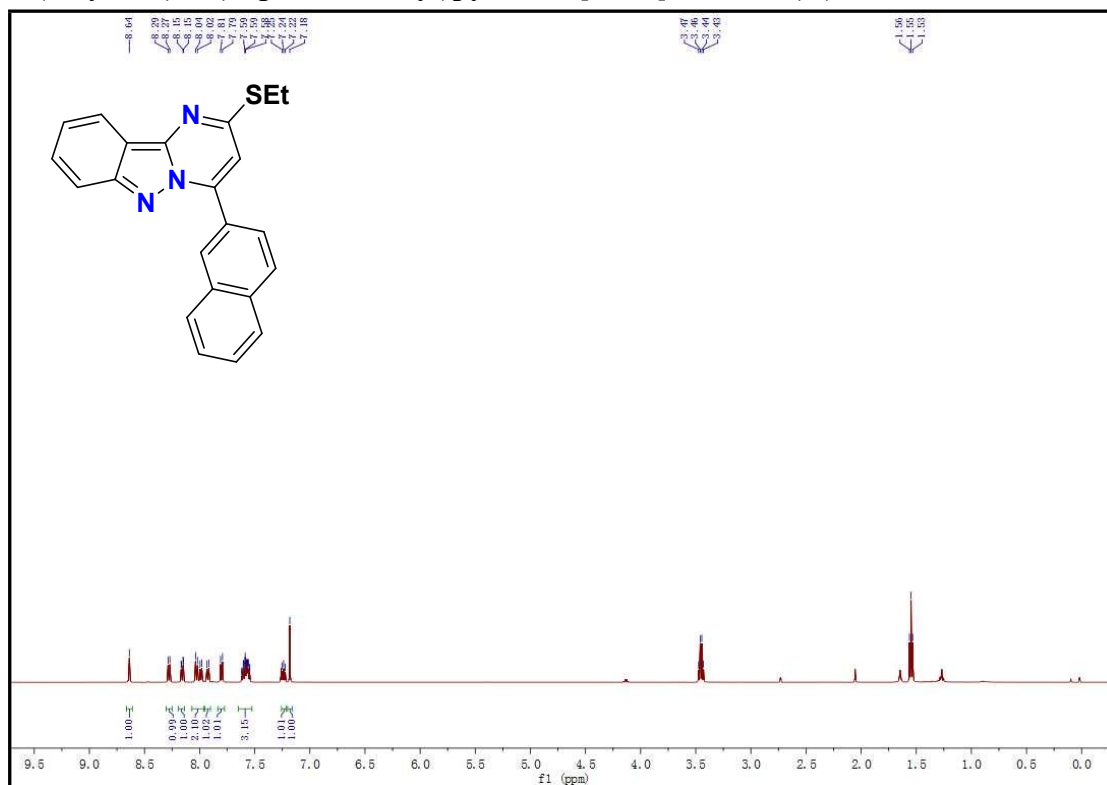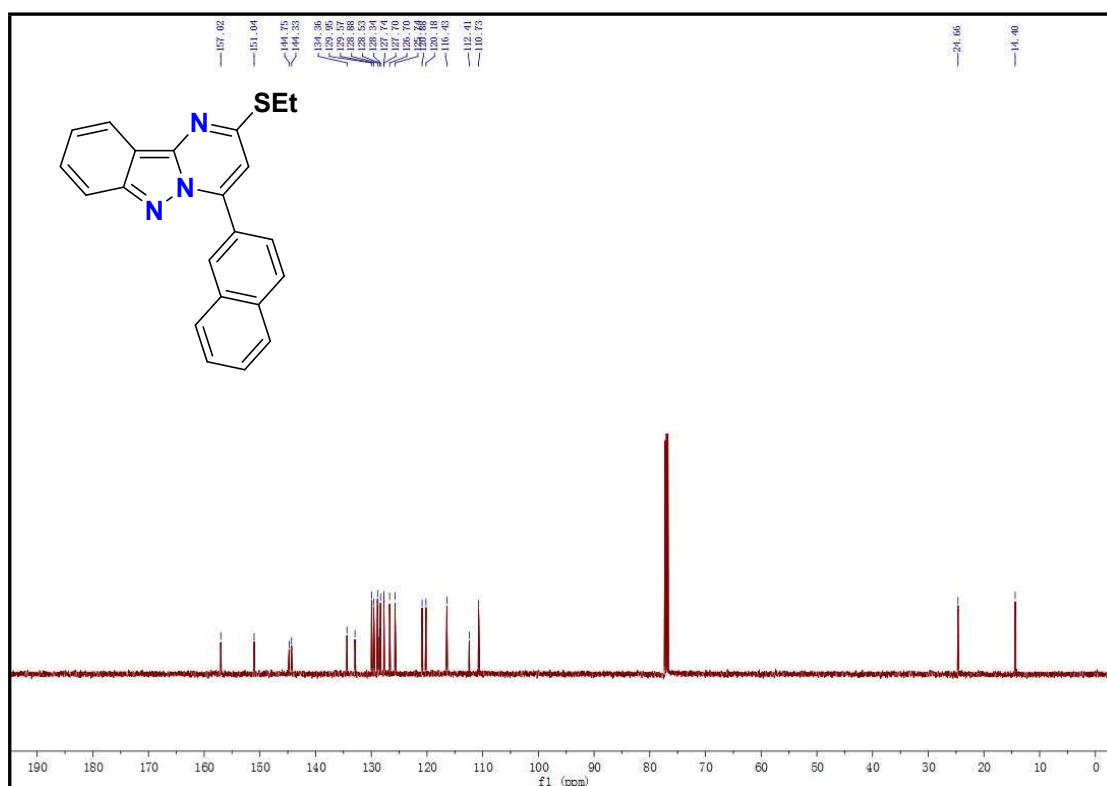



### 2-(ethylthio)-4-(furan-2-yl)pyrimido[1,2-b]indazole (3m)

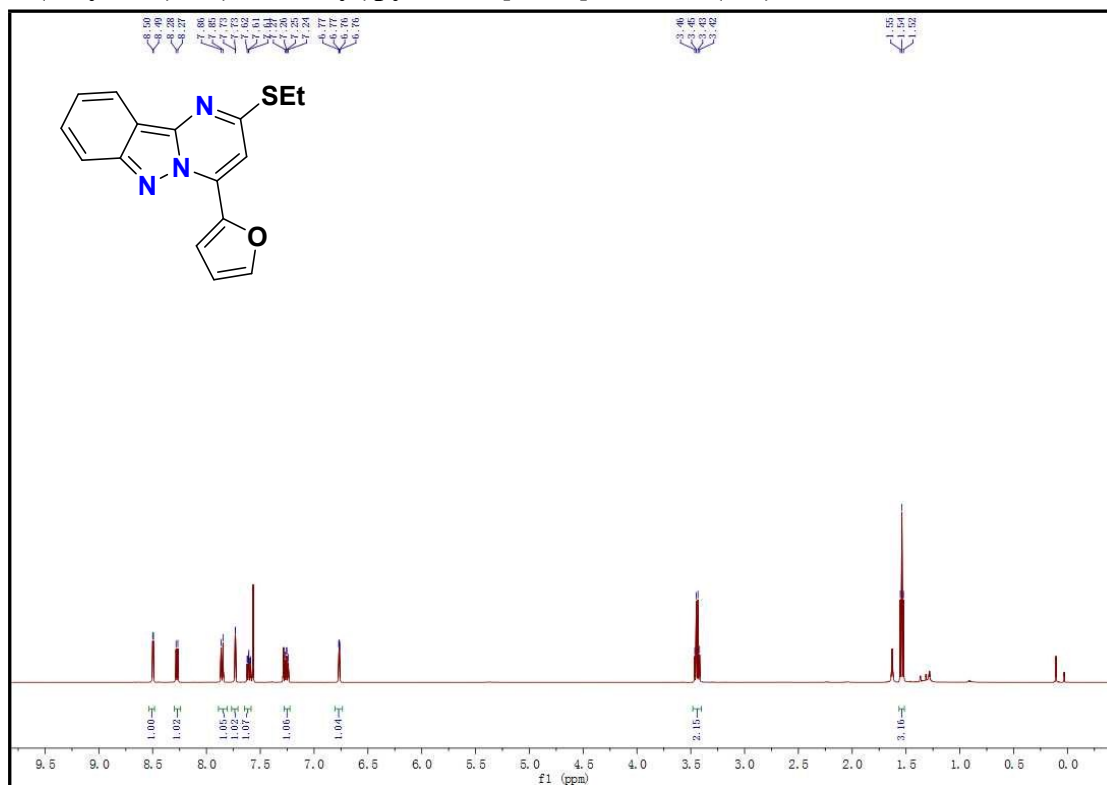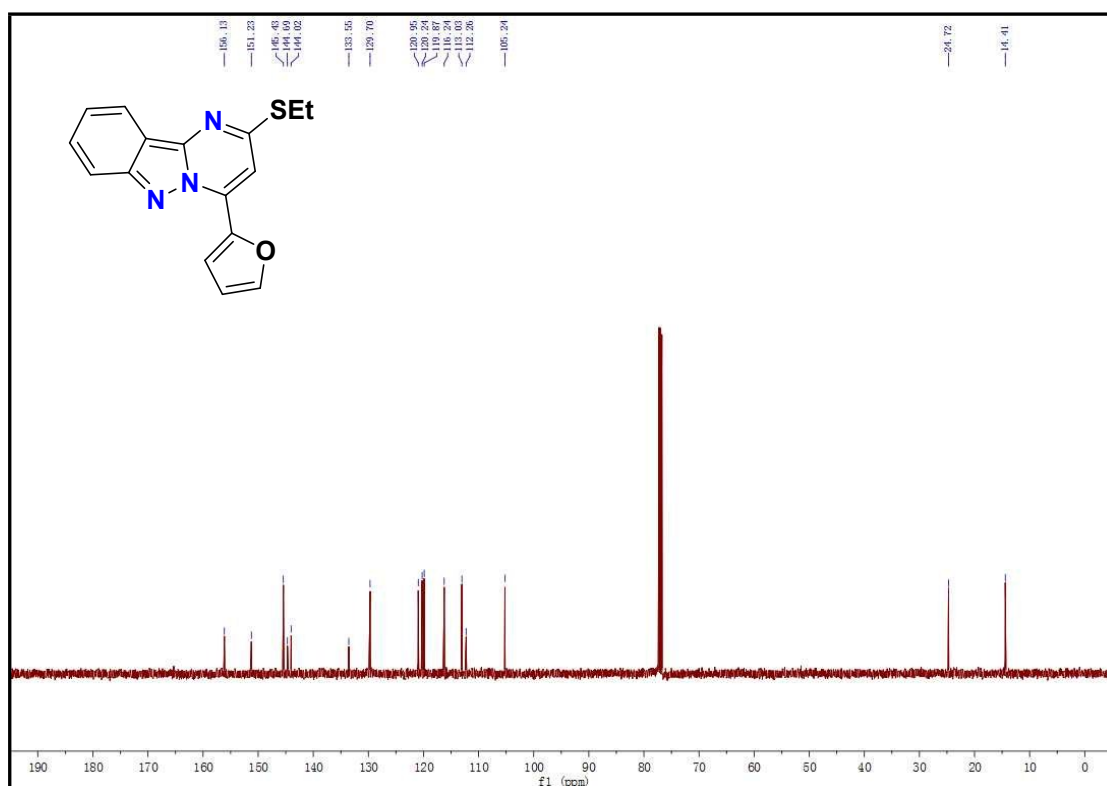

### 2-(ethylthio)-4-(thiophen-2-yl)pyrimido[1,2-b]indazole (3n)

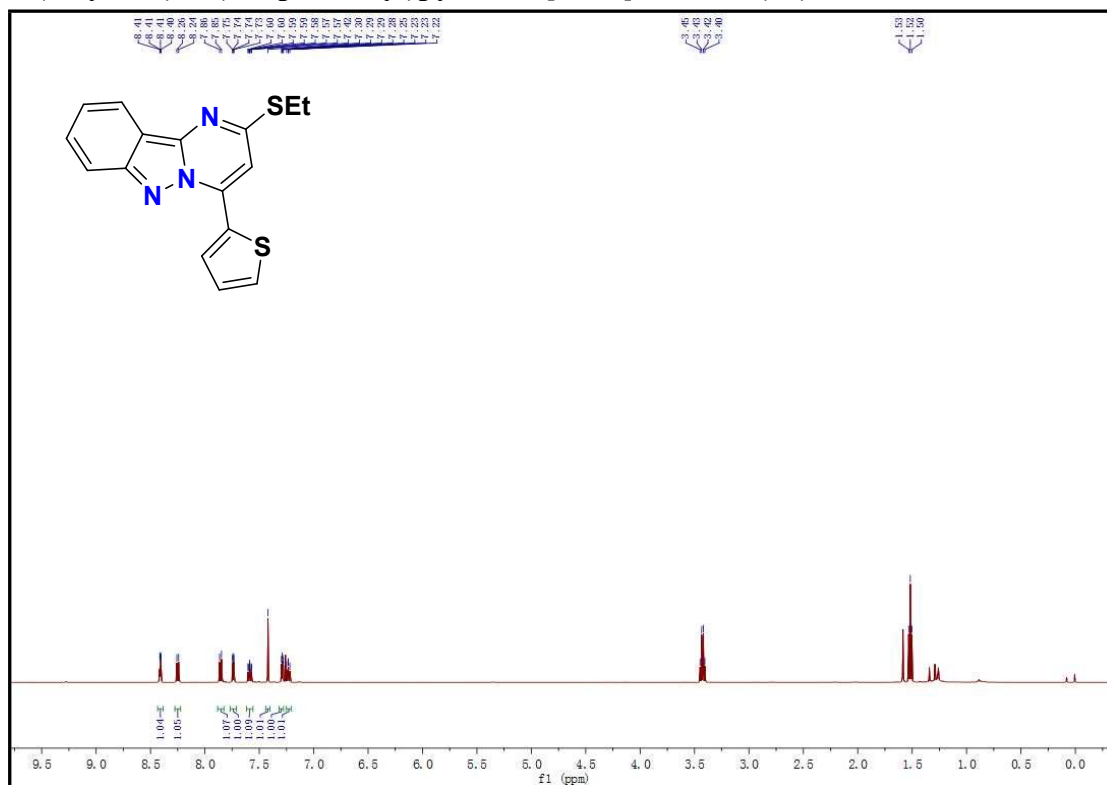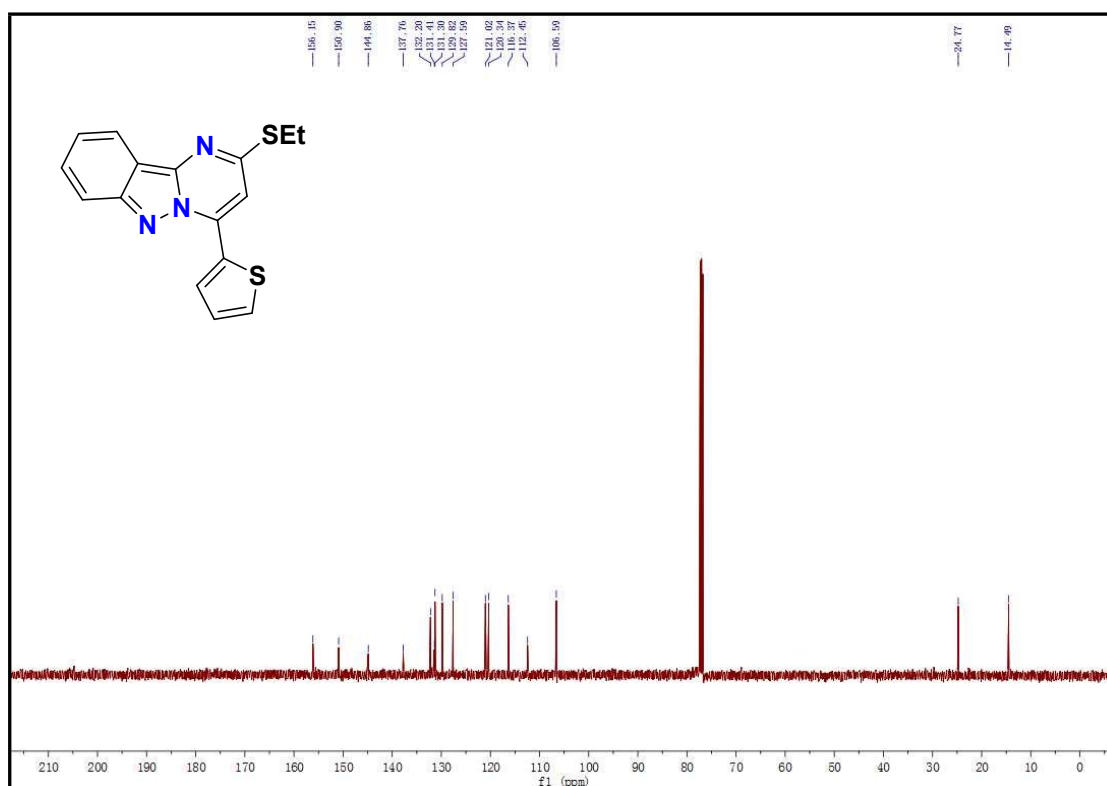

## 2-(methylthio)-4-phenylpyrimido[1,2-b]indazole (3o)

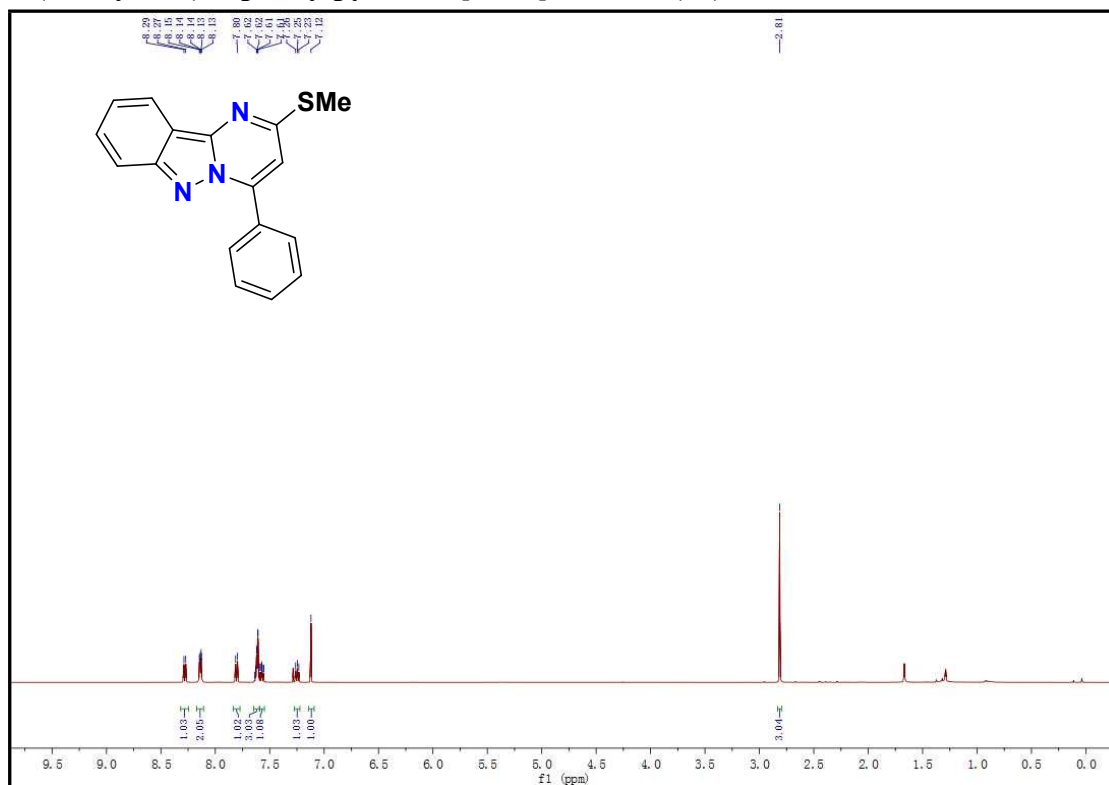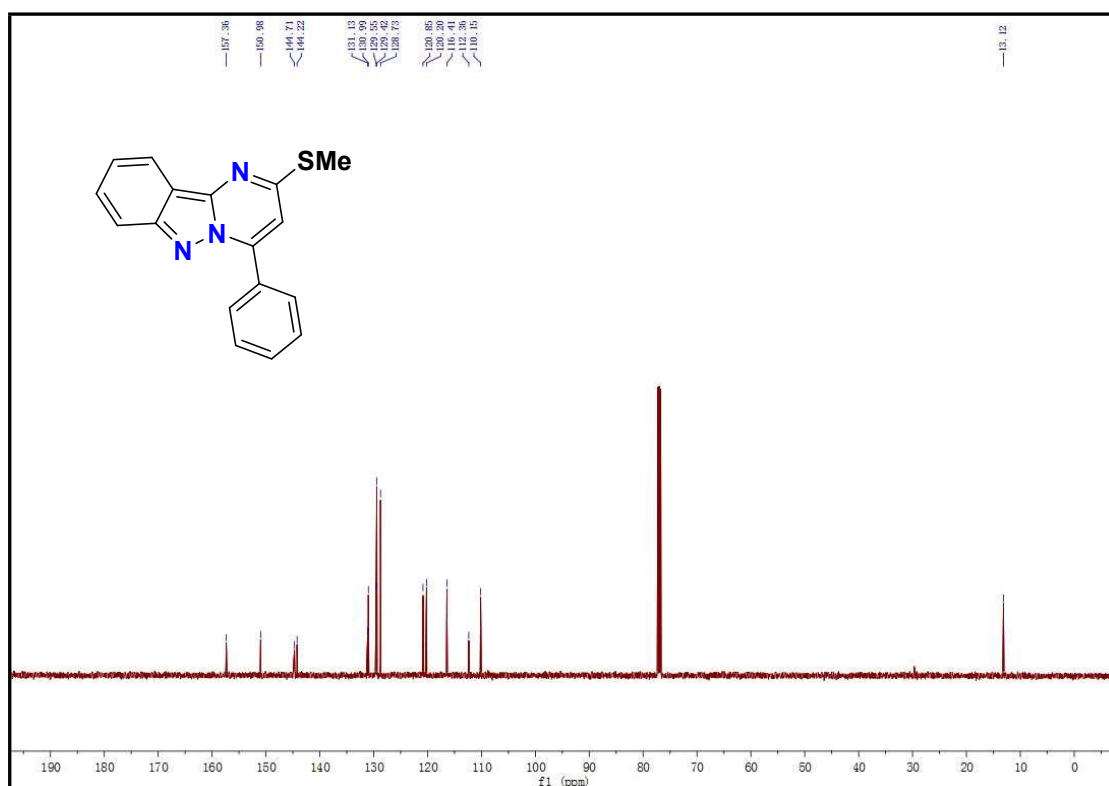

### 9-fluoro-2-(methylthio)-4-phenylpyrimido[1,2-b]indazole (3p)

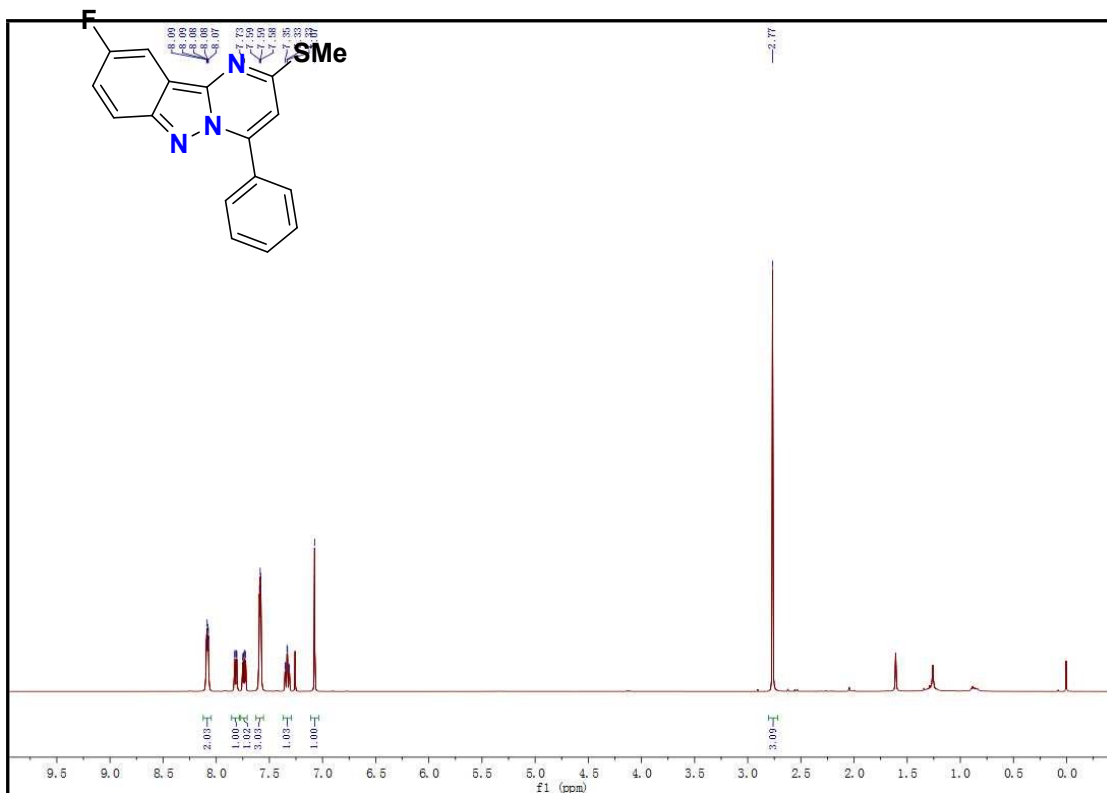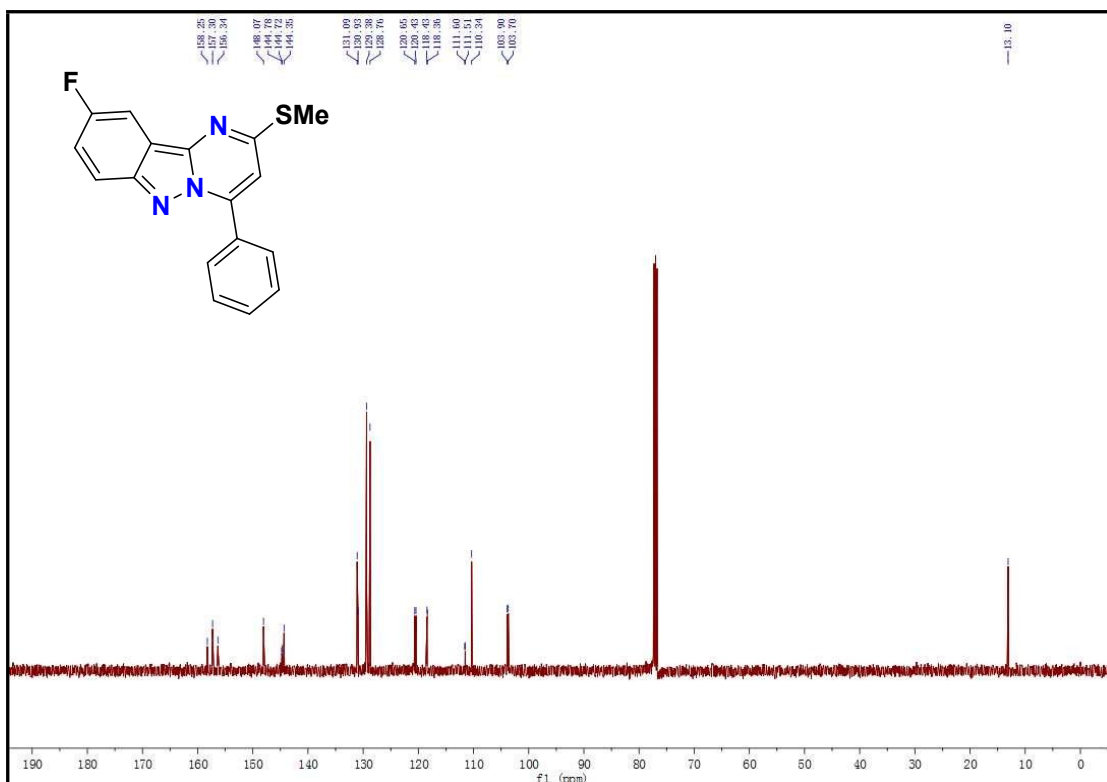

### 10-chloro-2-(methylthio)-4-phenylpyrimido[1,2-b]indazole (3q)

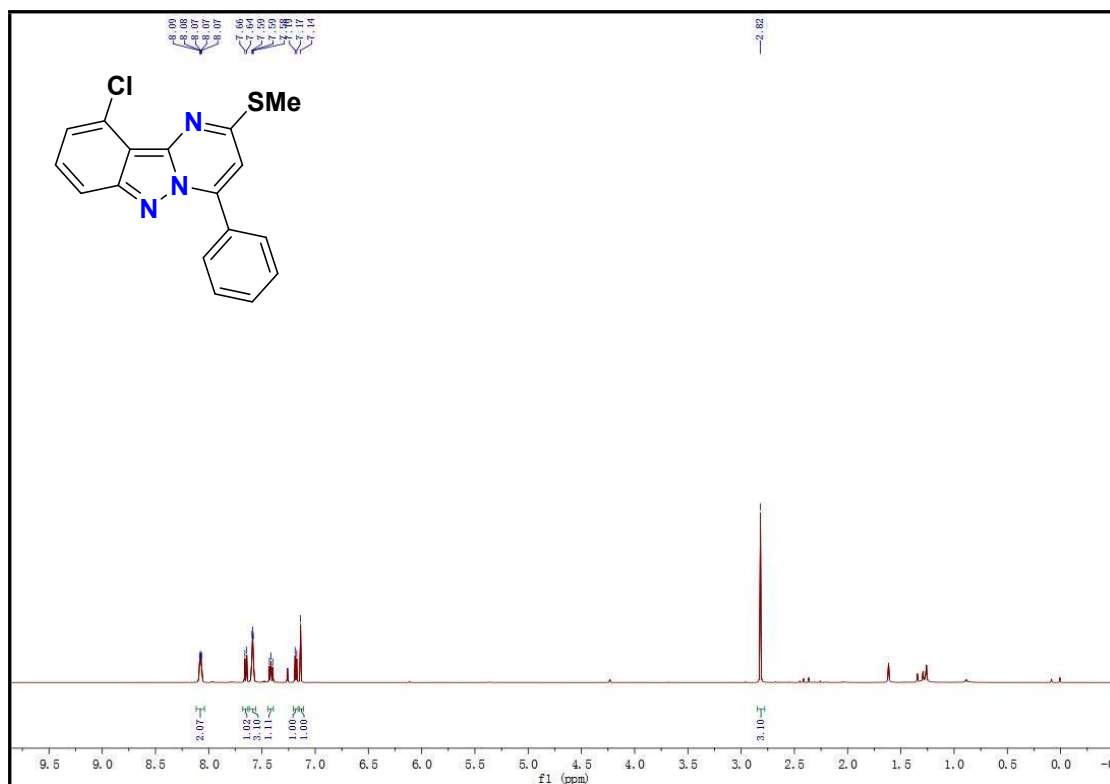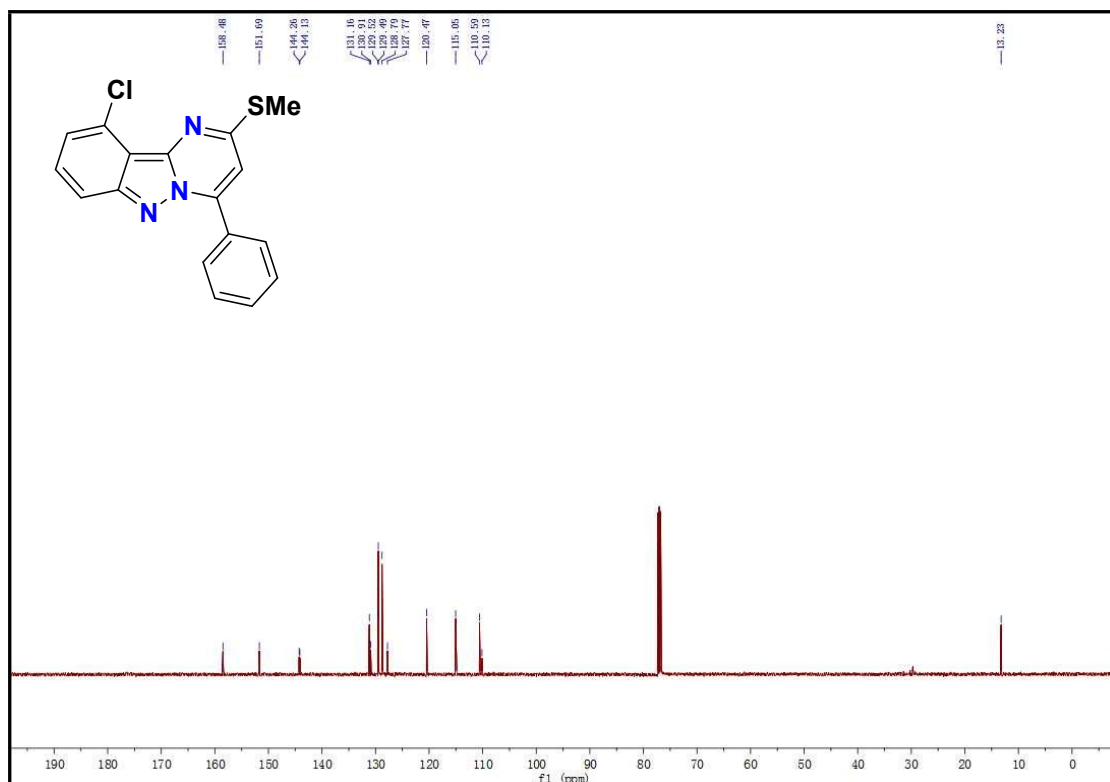

### 9-bromo-2-(methylthio)-4-phenylpyrimido[1,2-b]indazole (3r)

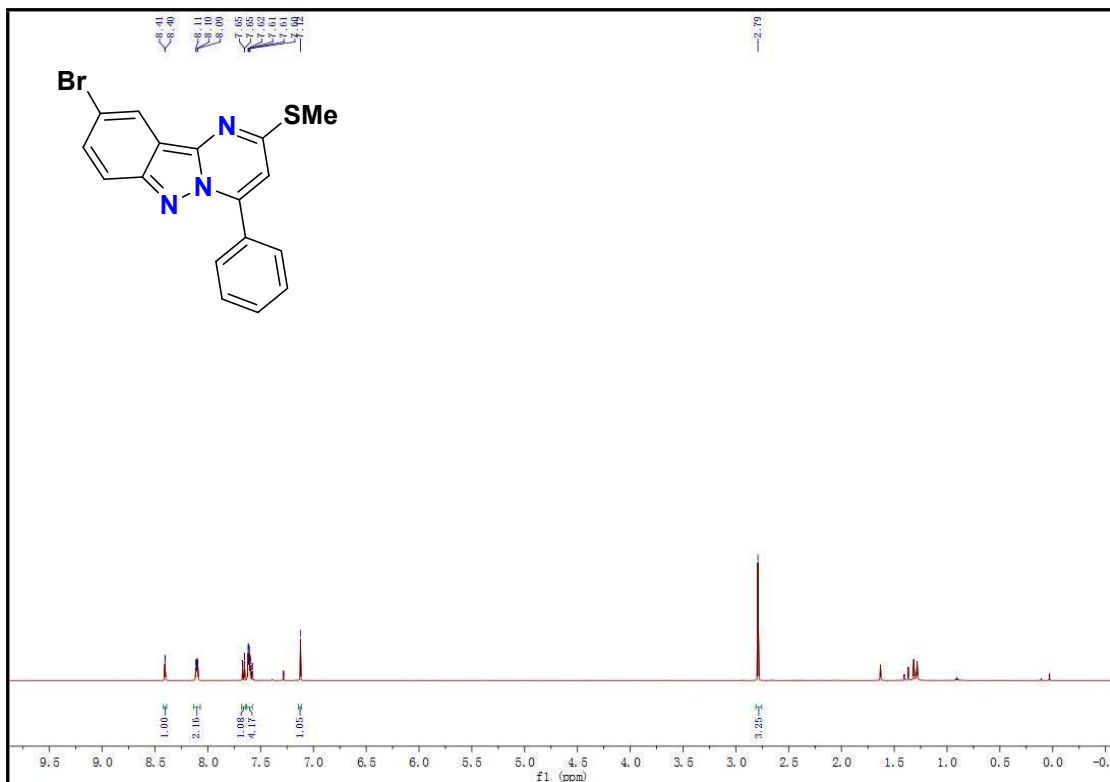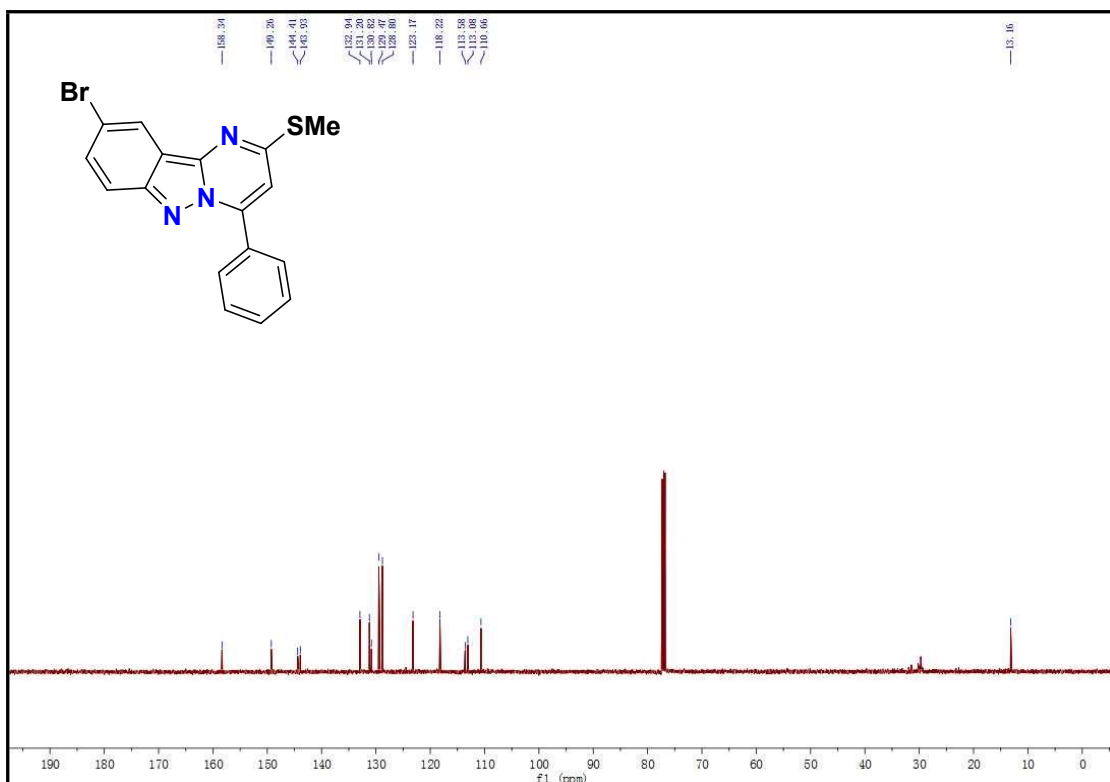



### 9-bromo-8-methyl-2-(methylthio)-4-phenylpyrimido[1,2-b]indazole (3t)

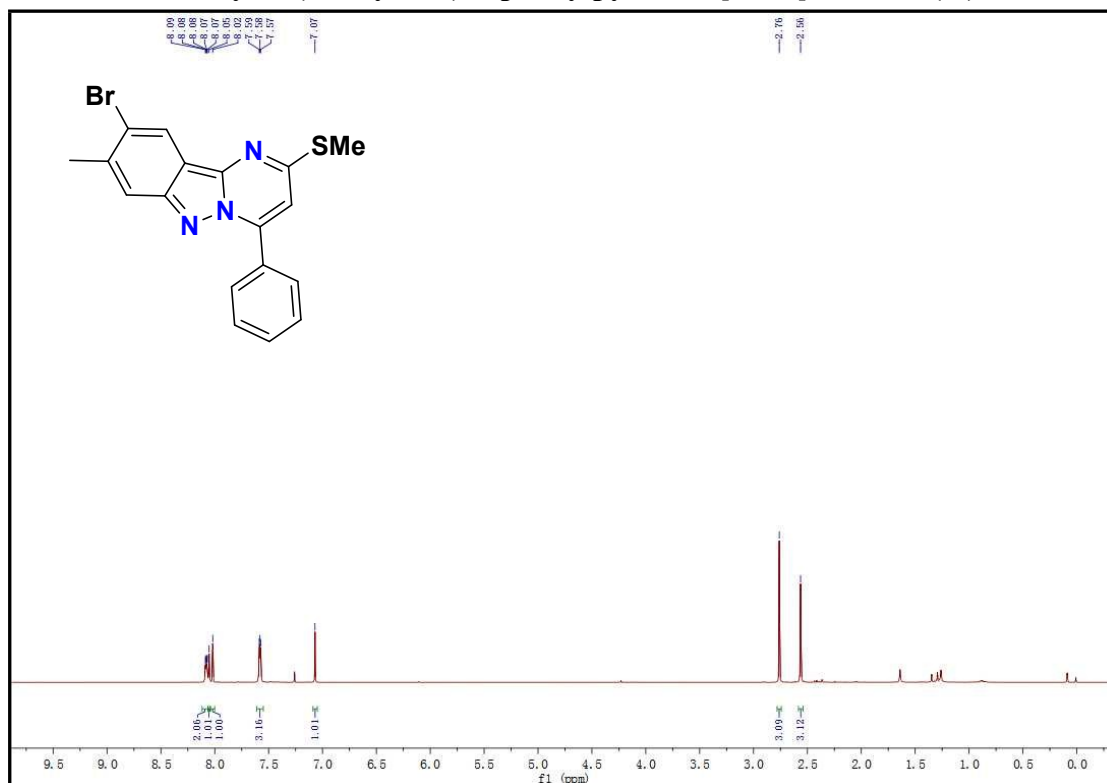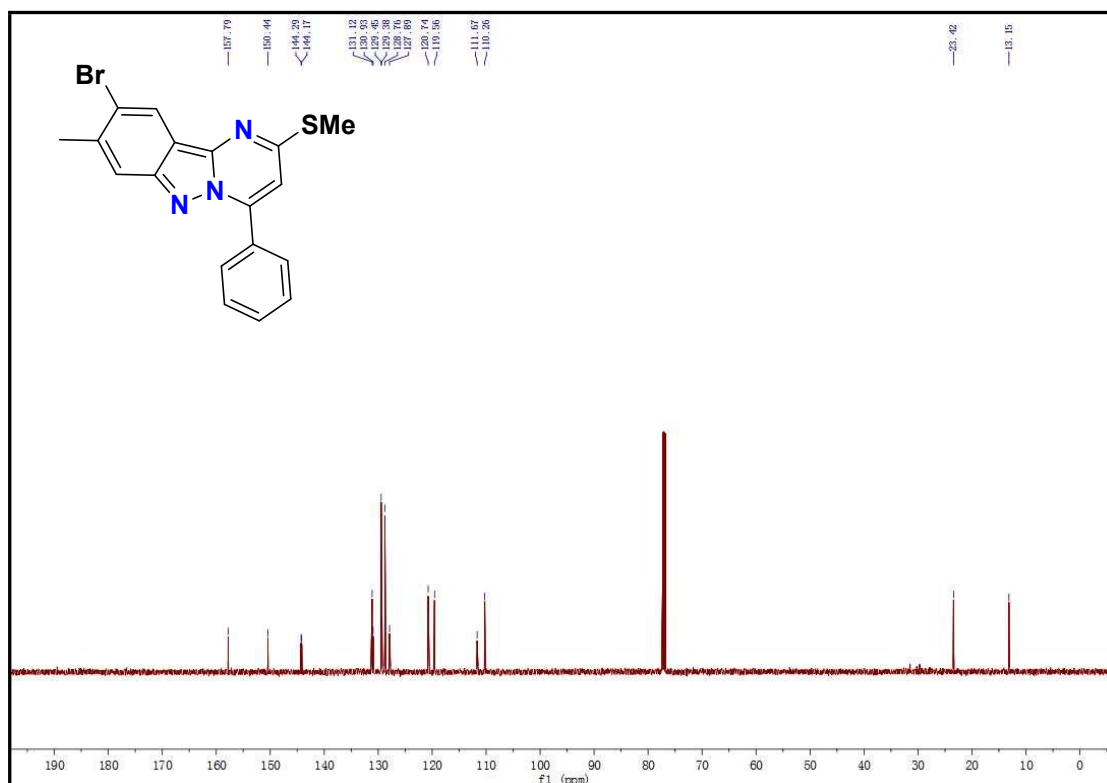



## 2-(methylthio)-4-phenyl-9-(trifluoromethyl)pyrimido[1,2-b]indazole (3u)

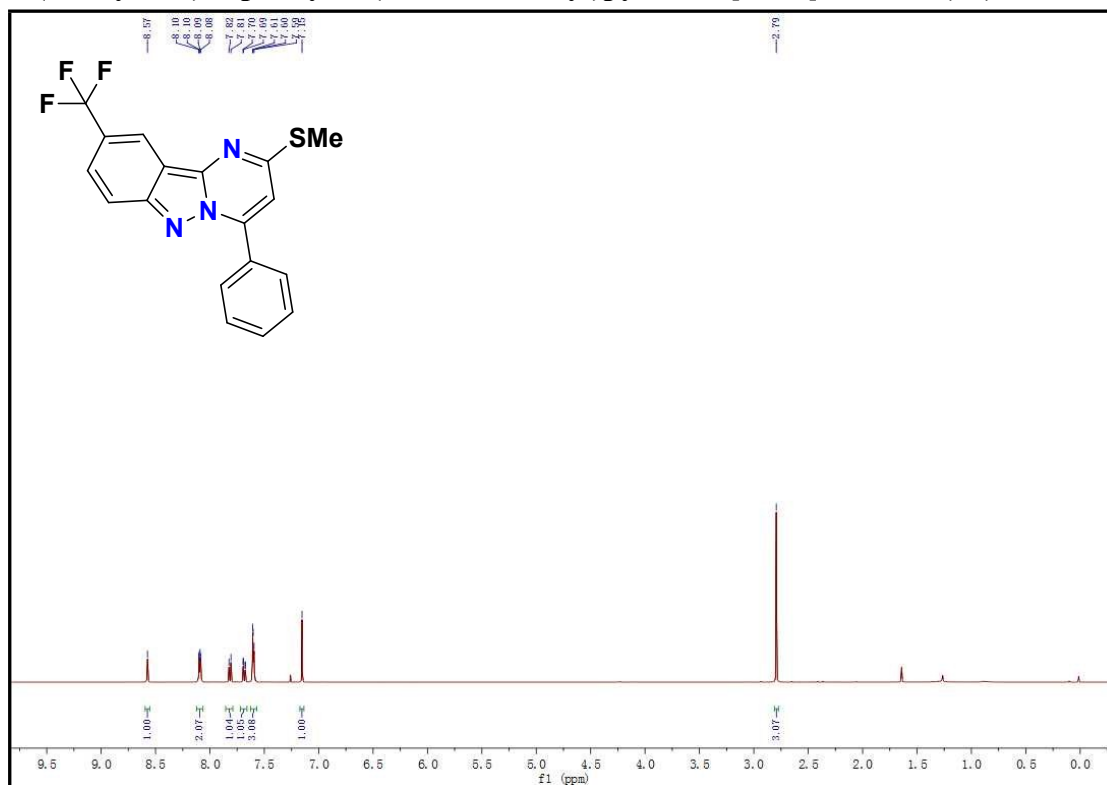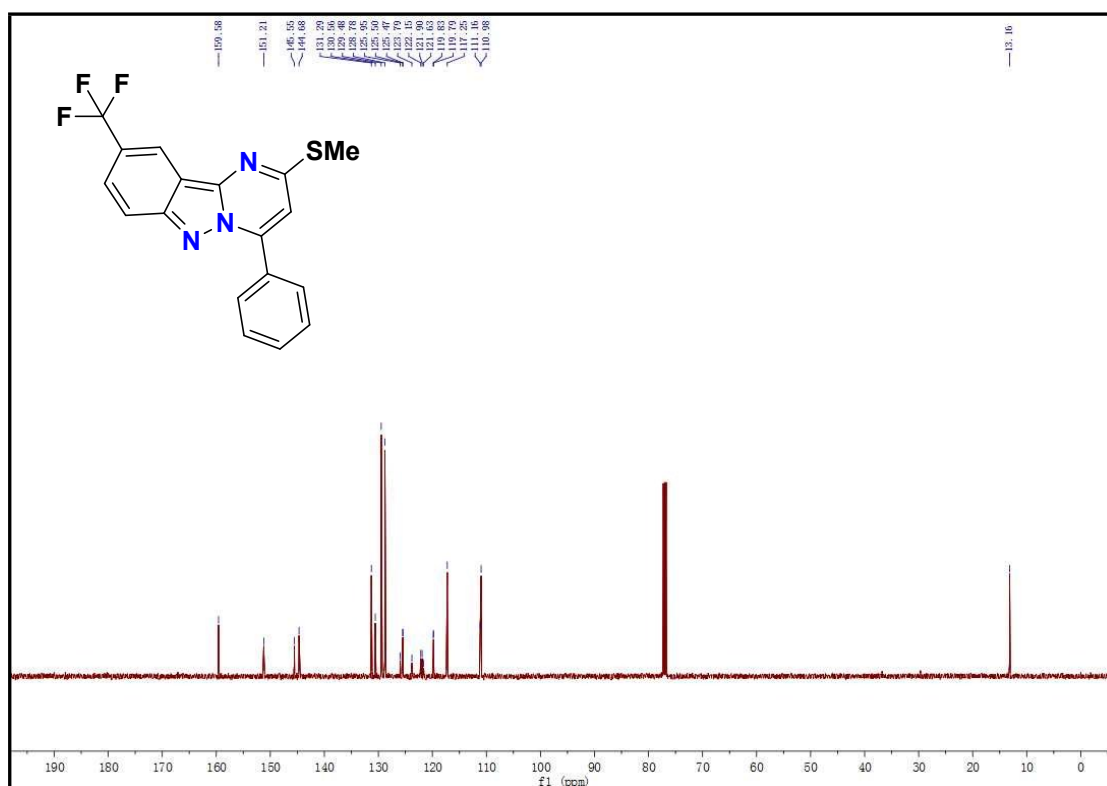

### 8-methoxy-2-(methylthio)-4-phenylpyrimido[1,2-b]indazole (3v)

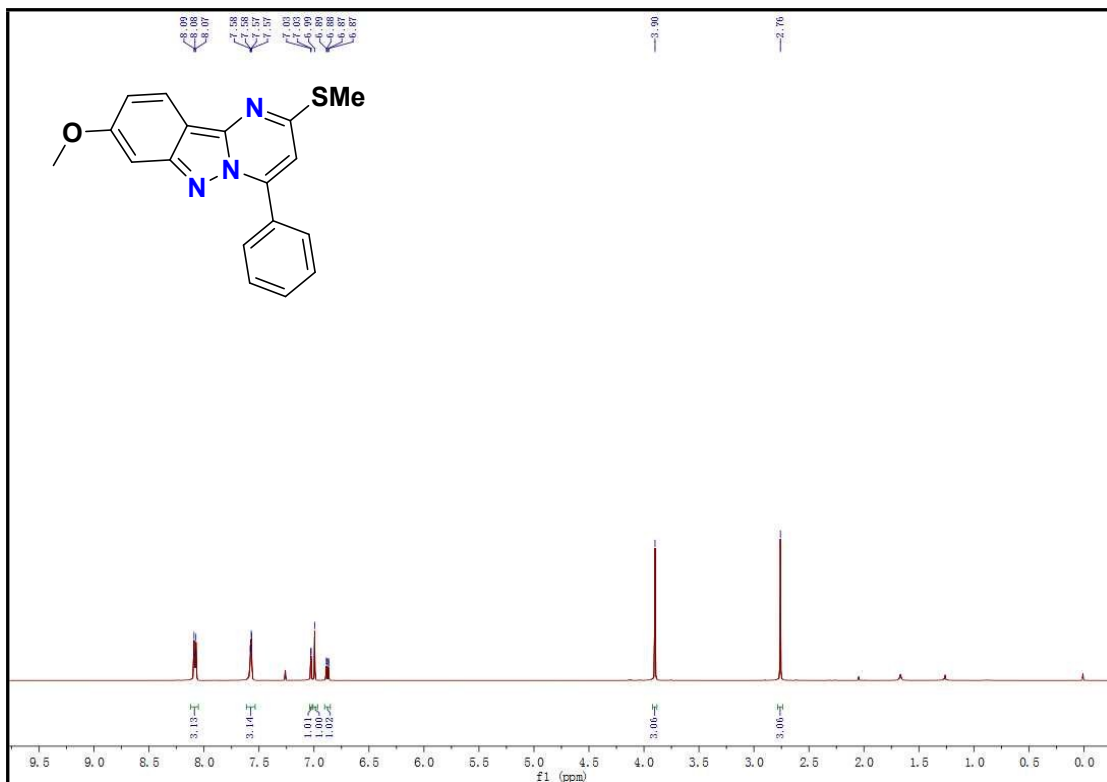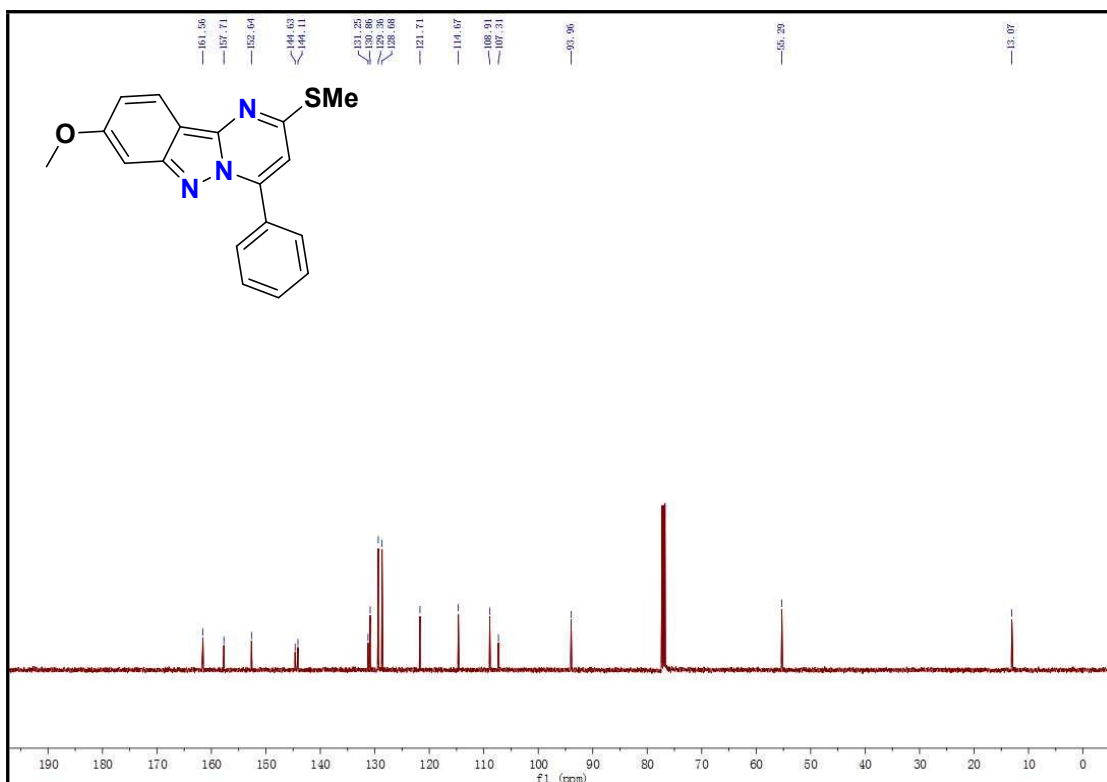

## 2-(methylthio)-4,8-diphenylpyrimido[1,2-b]indazole (3w)

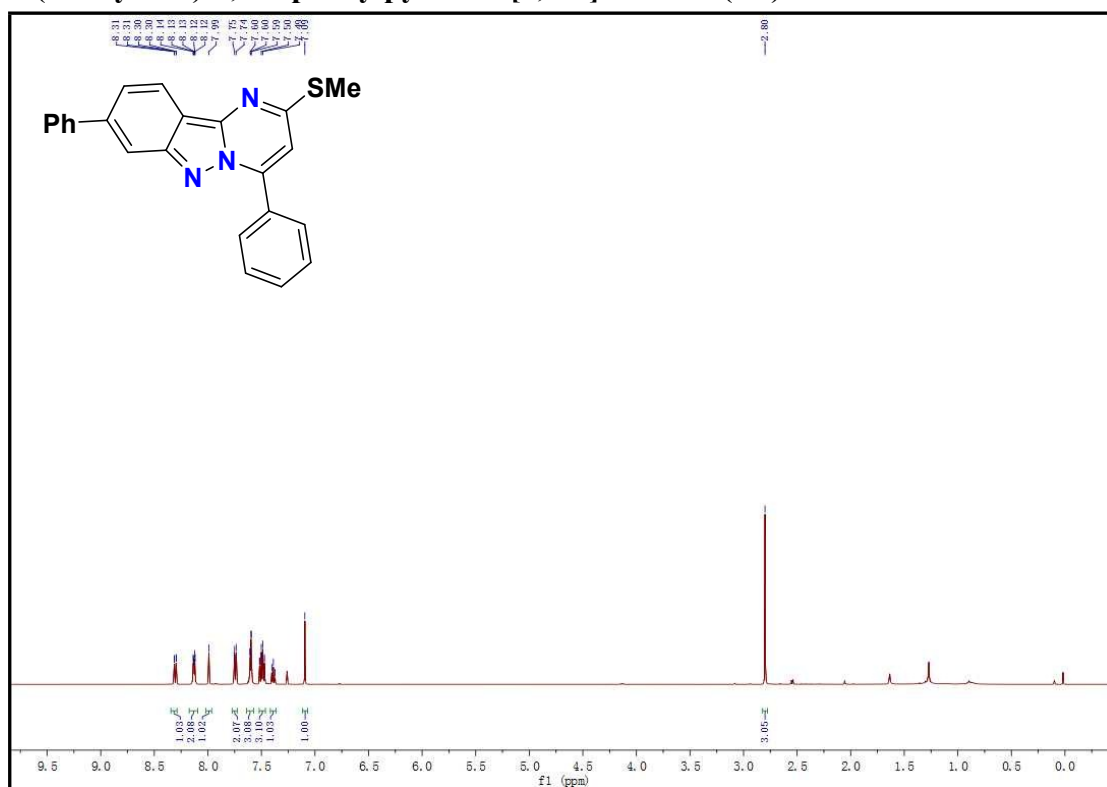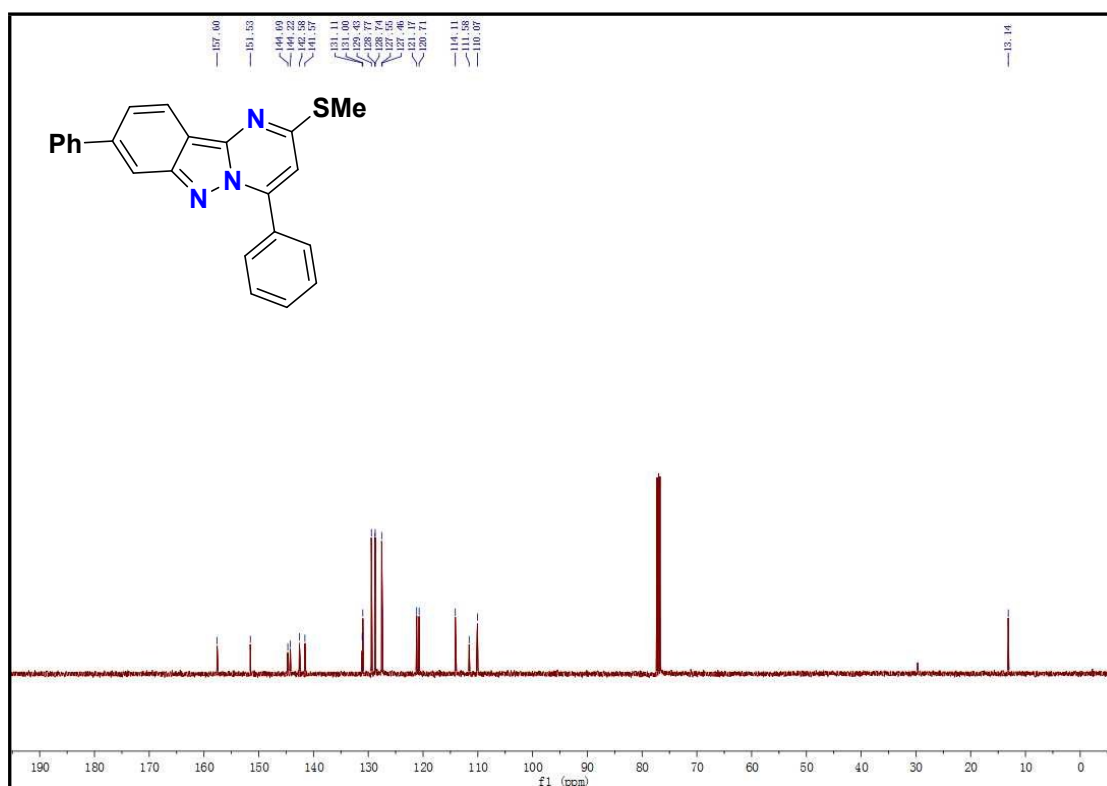

### 8-methyl-2-(methylthio)-4-phenylpyrimido[1,2-b]indazole (3x)

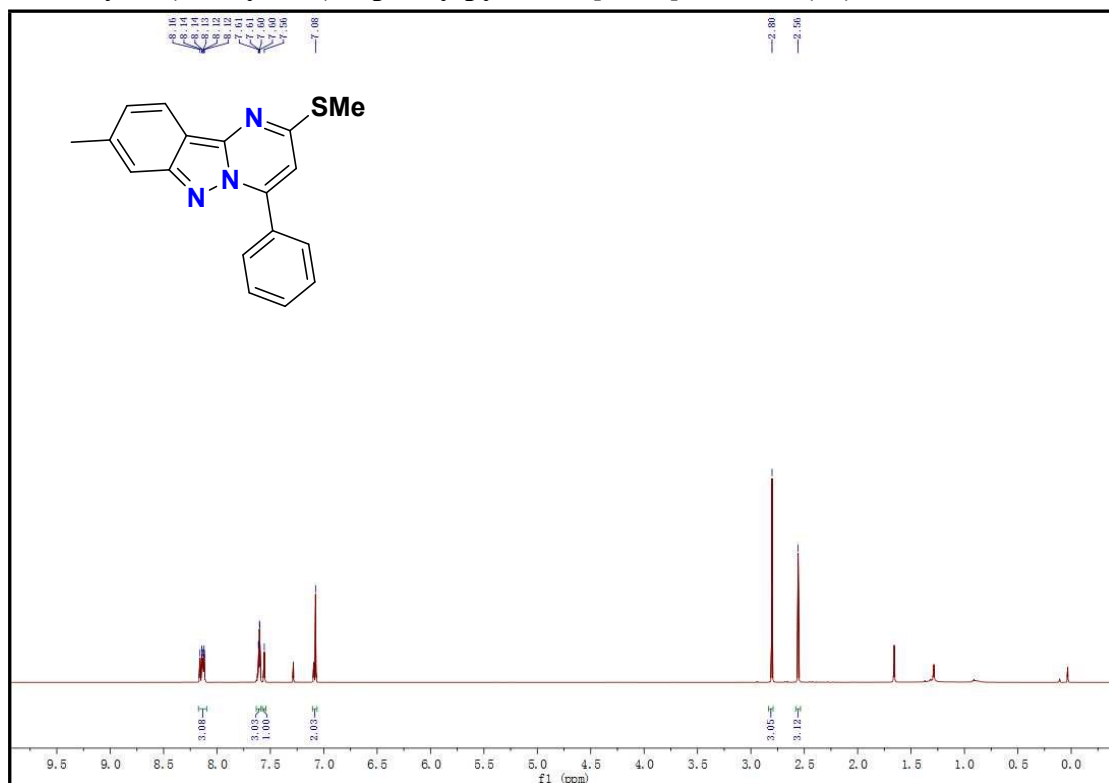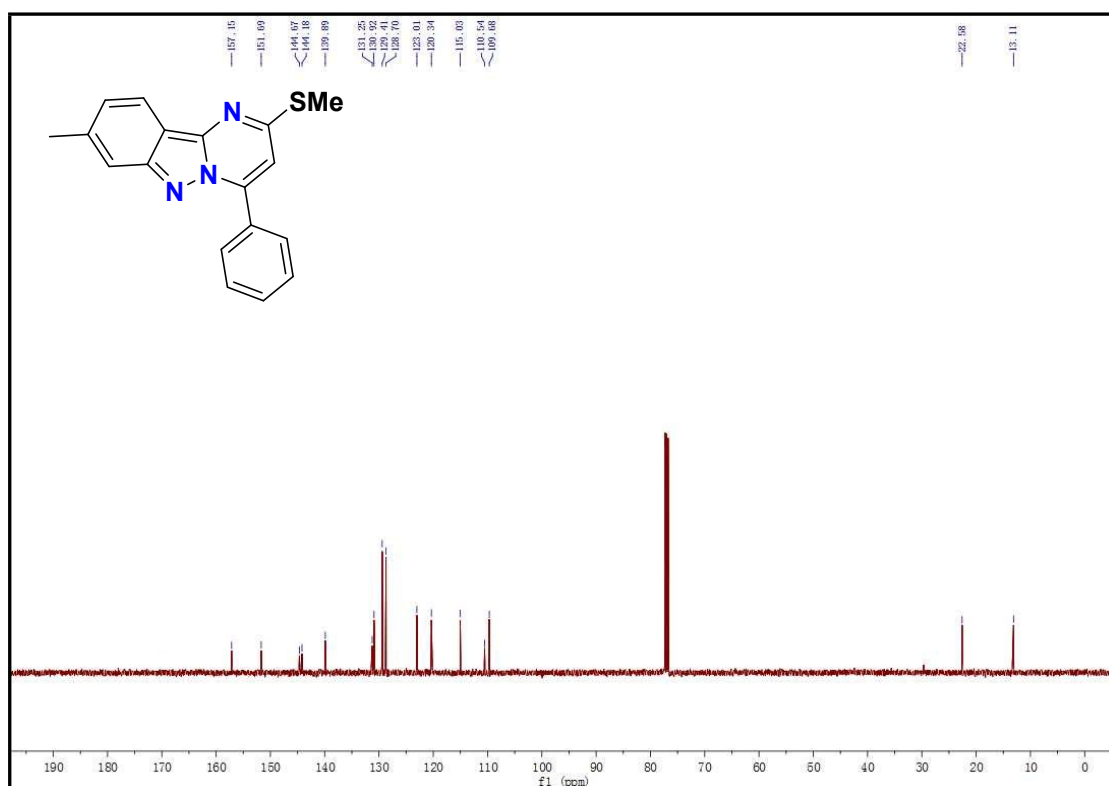

## 2-(methylthio)-9-(naphthalen-2-ylmethoxy)-4-phenylpyrimido[1,2-b]indazole (3y)

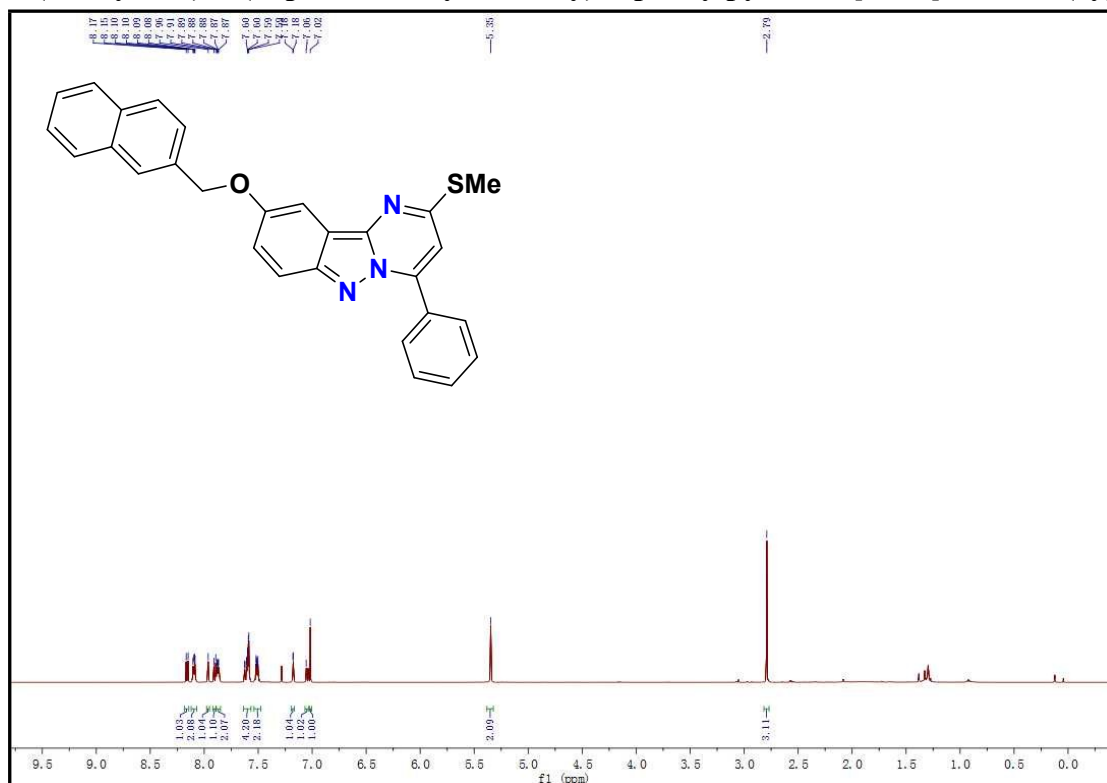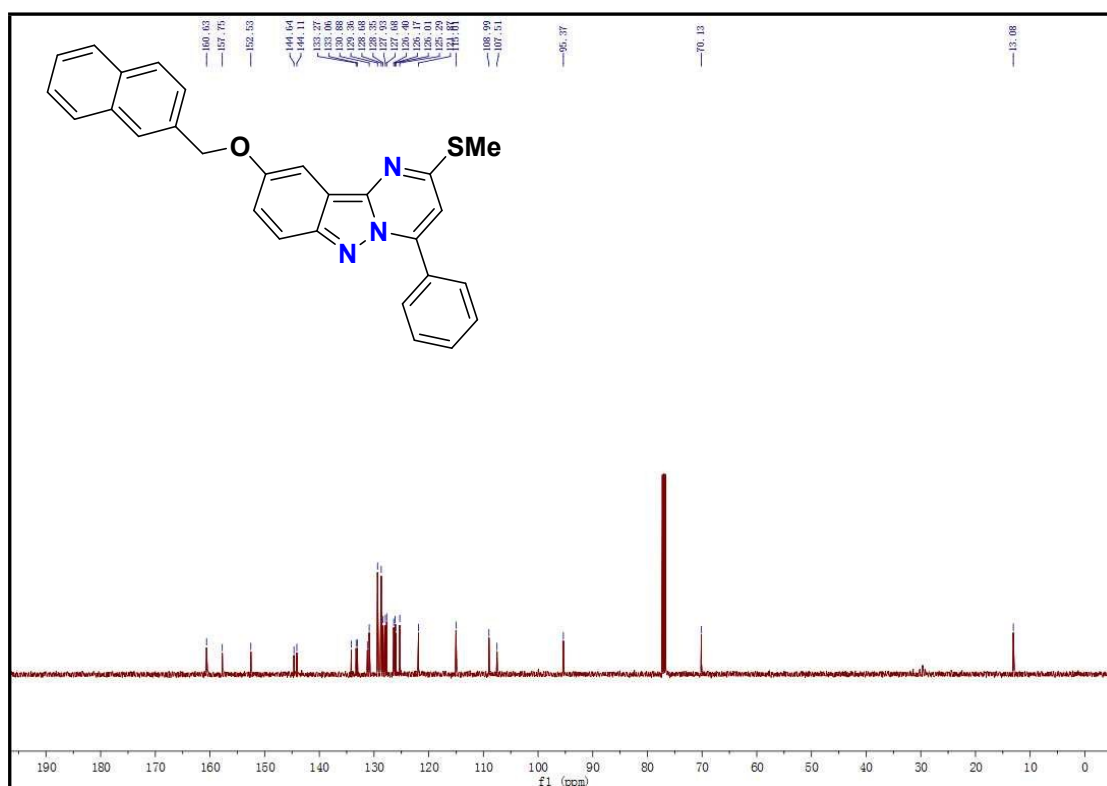

### 8-(benzo[d][1,3]dioxol-5-yl)-2-(methylthio)-4-phenylpyrimido[1,2-b]indazole (3z)

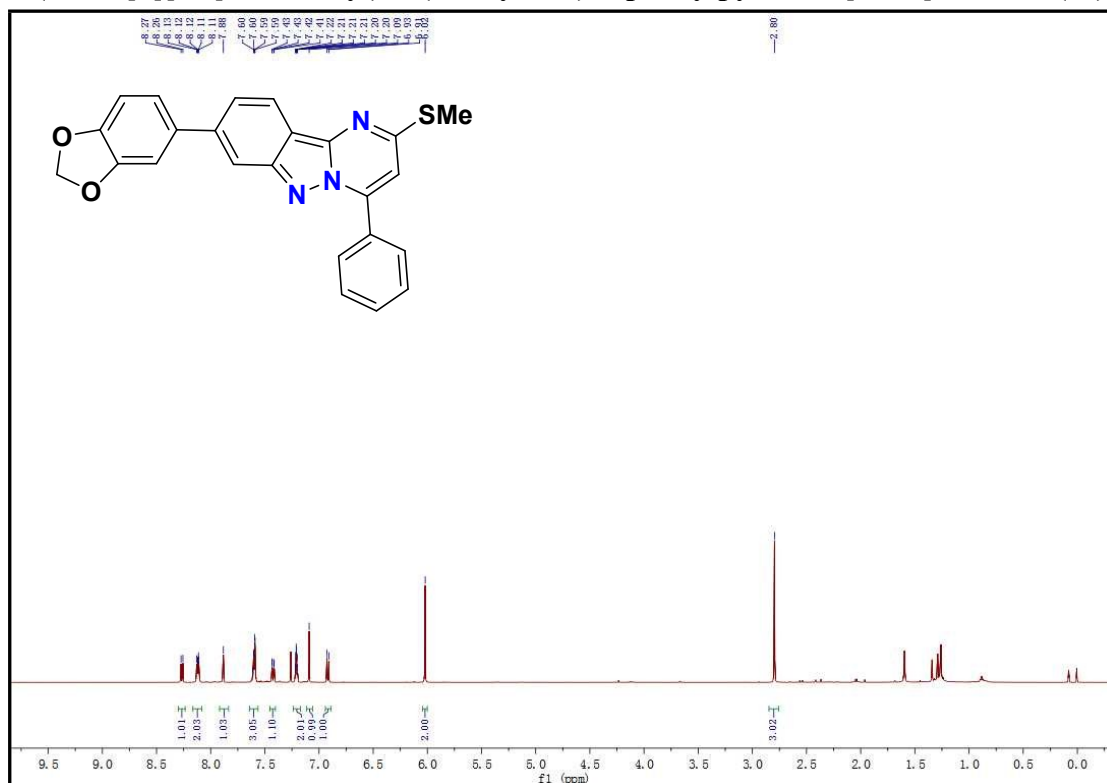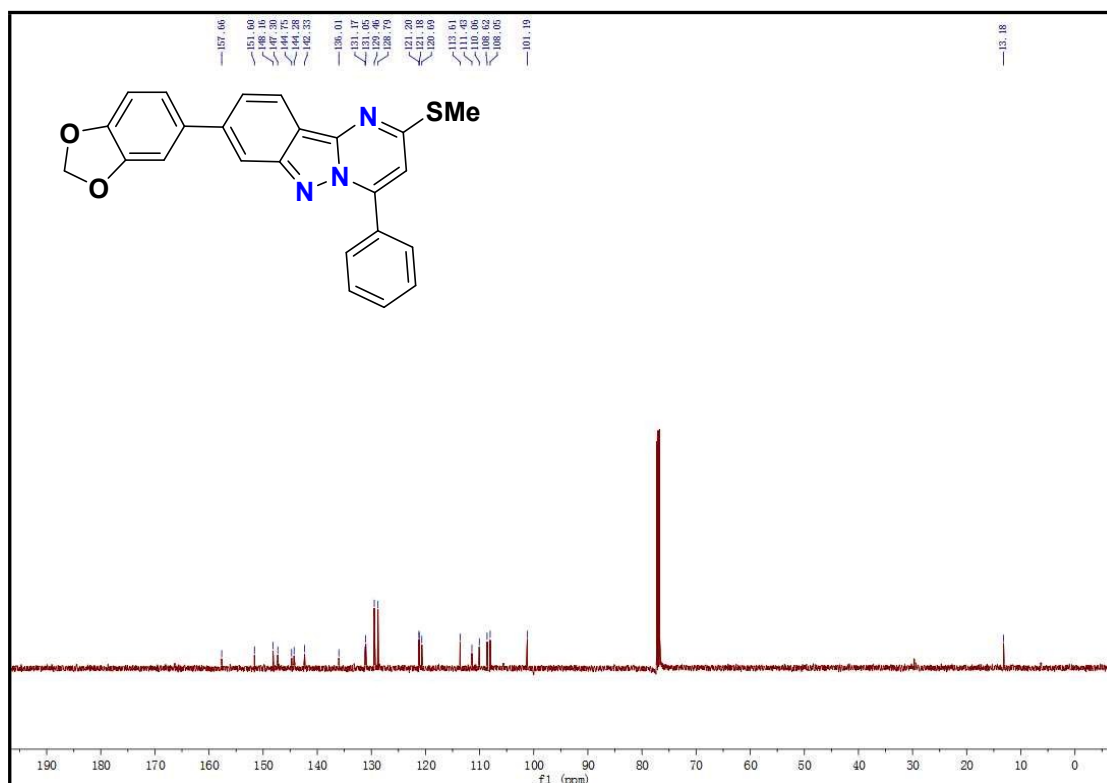

**(1S,2R,4S)-1,7,7-trimethylbicyclo[2.2.1]heptan-2-yl-2-(methylthio)-4-phenylpyrimido[1,2-b]indazole-8-carboxylate (**3β**)**

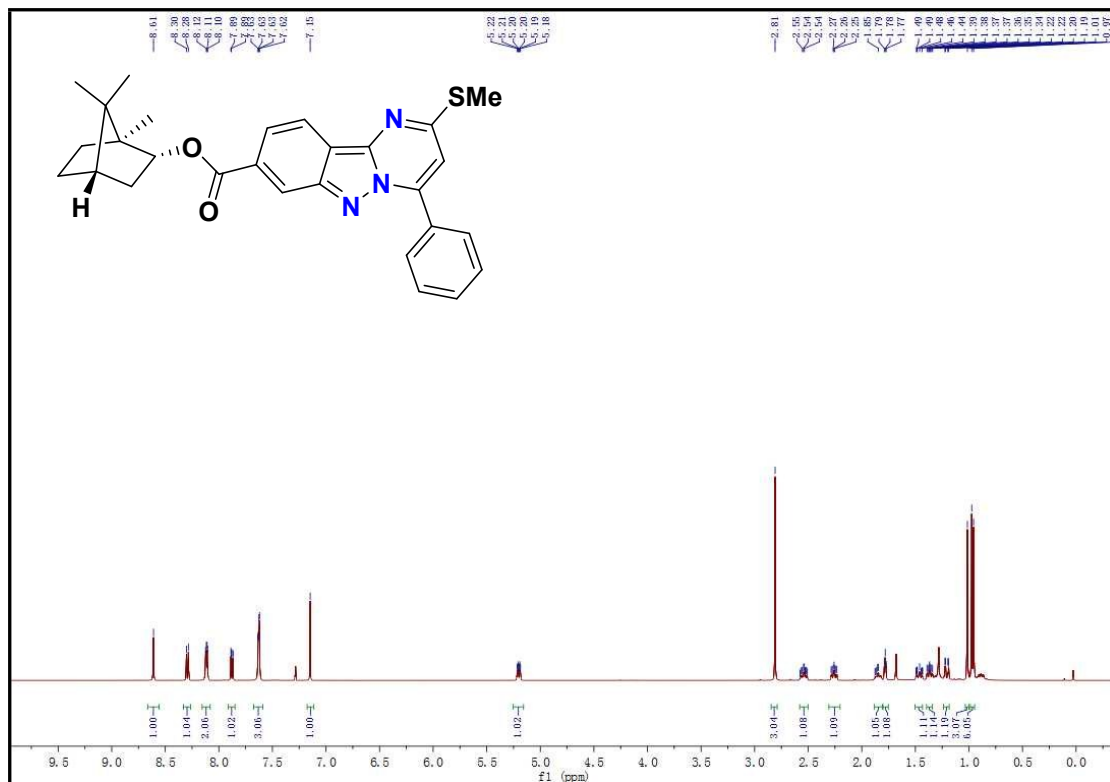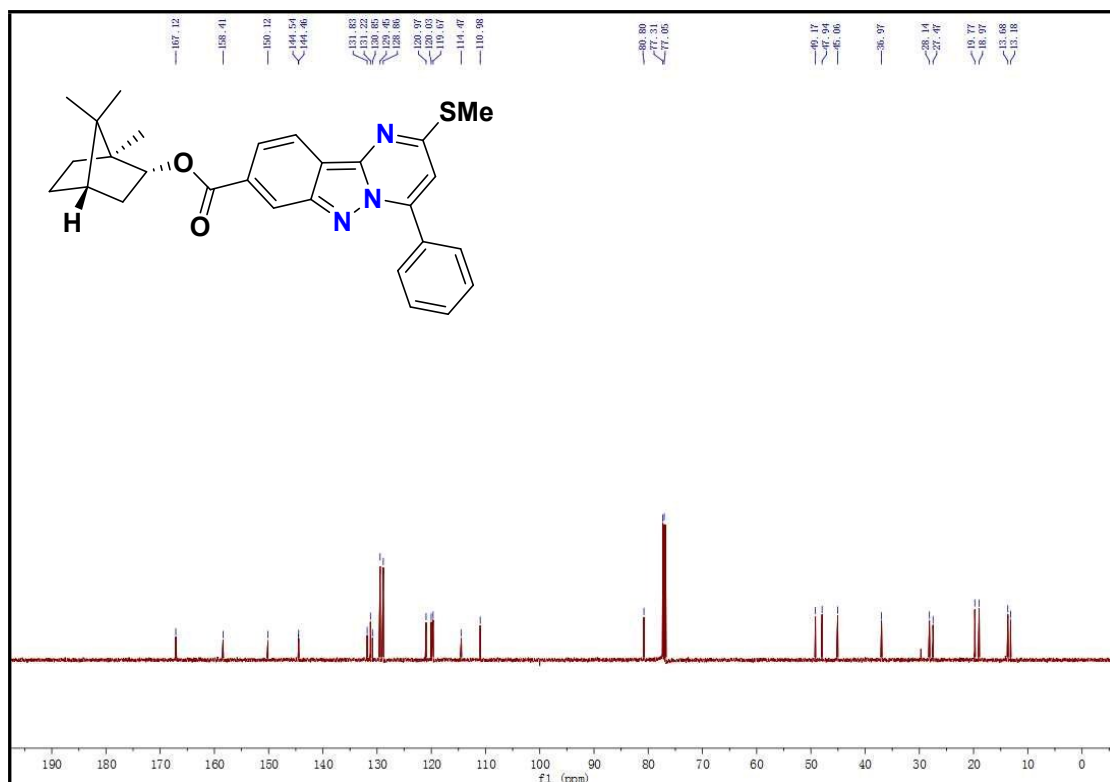

## 2-(1,1-bis(ethylthio)-3-oxo-3-phenylprop-1-en-2-yl)benzonitrile (4a)

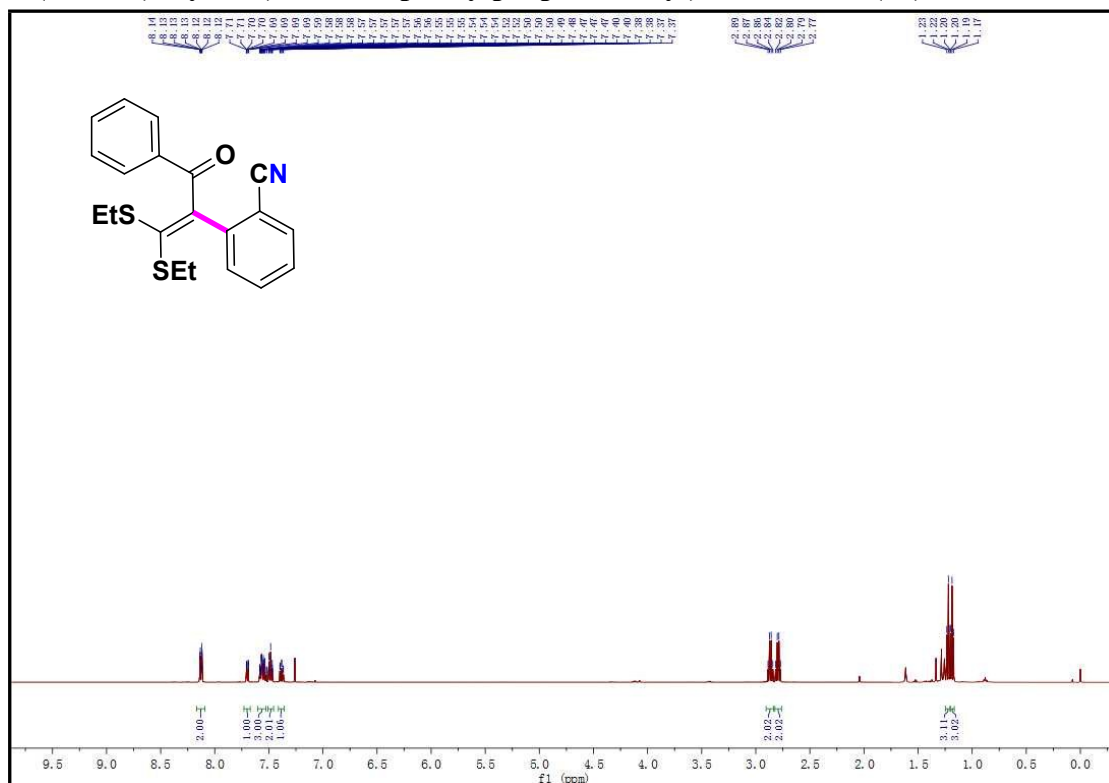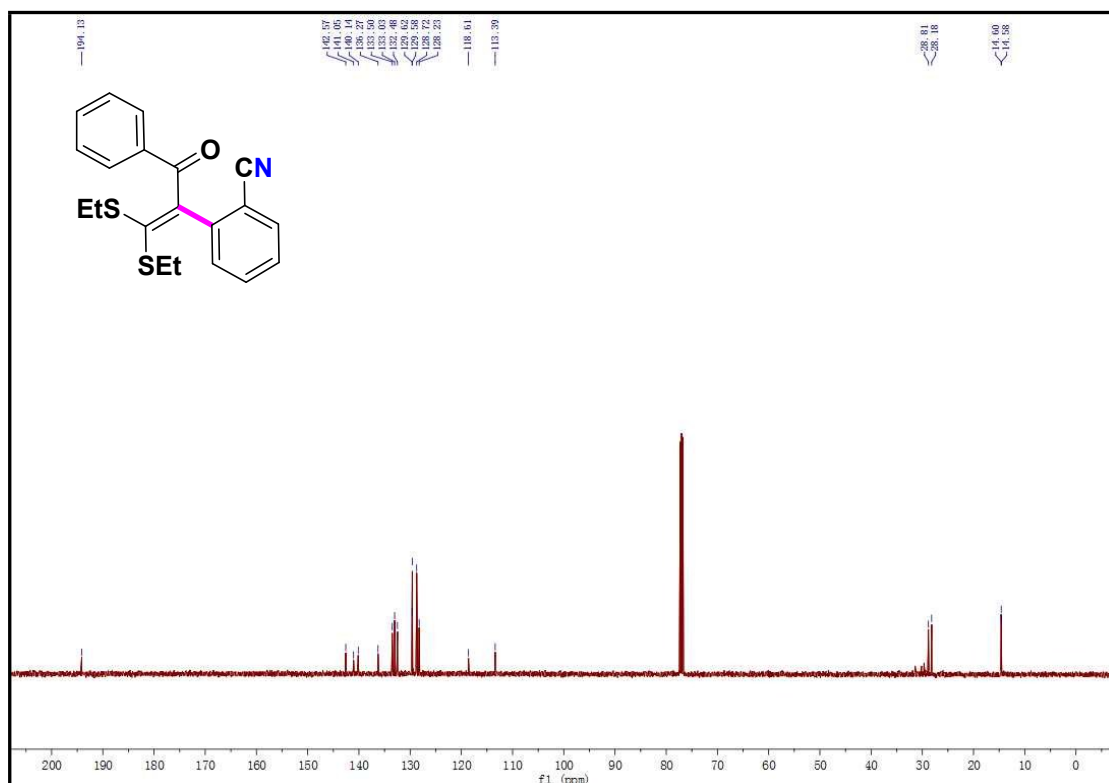



### 2-(1,1-bis(ethylthio)-3-(4-fluorophenyl)-3-oxoprop-1-en-2-yl)benzonitrile (4b)

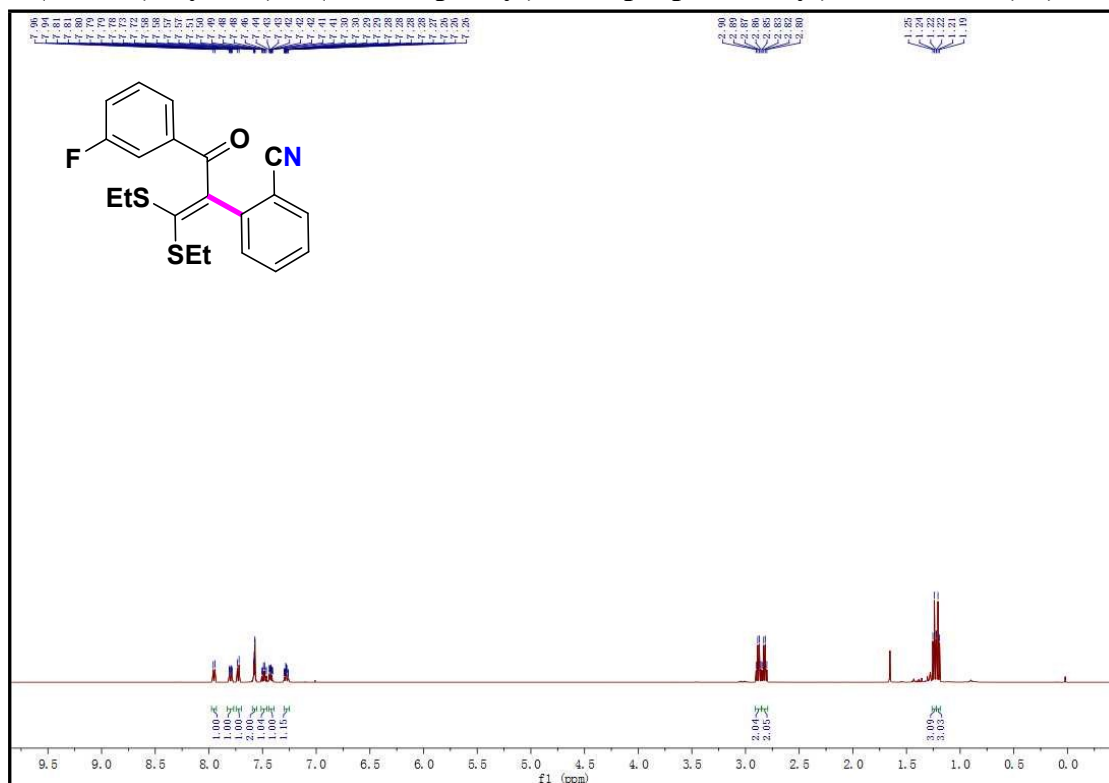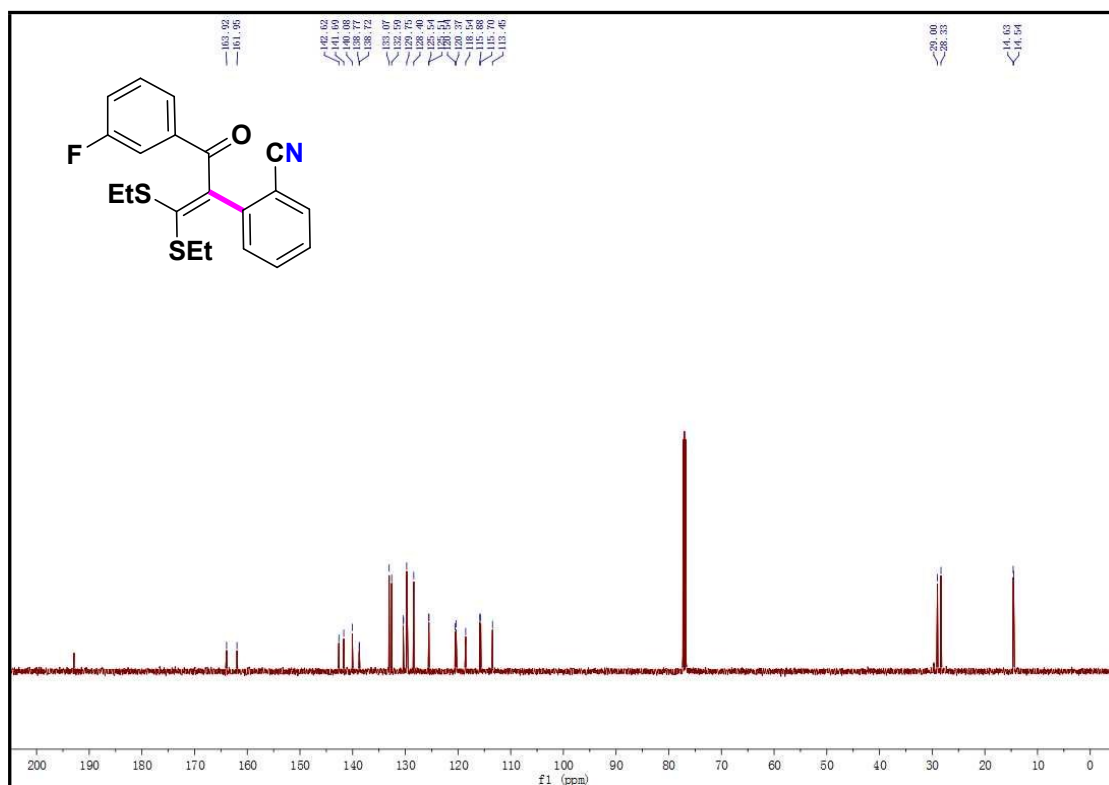

2-(3-(3-chlorophenyl)-1,1-bis(ethylthio)-3-oxoprop-1-en-2-yl)benzonitrile (4c)

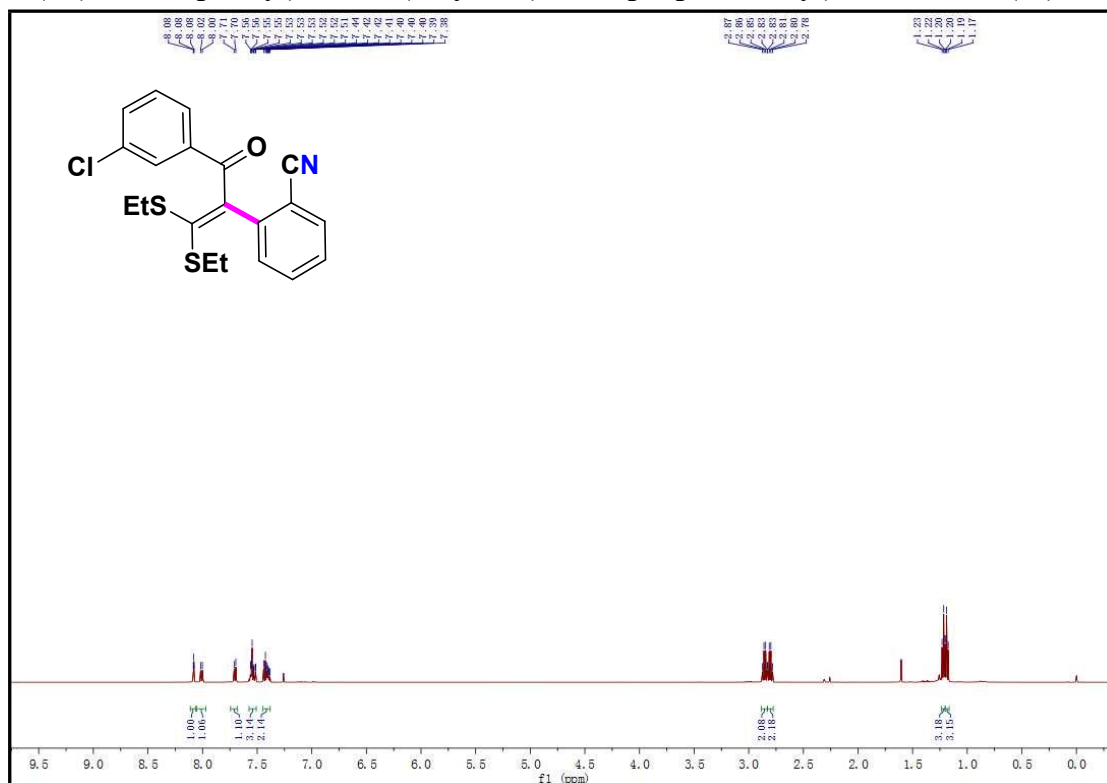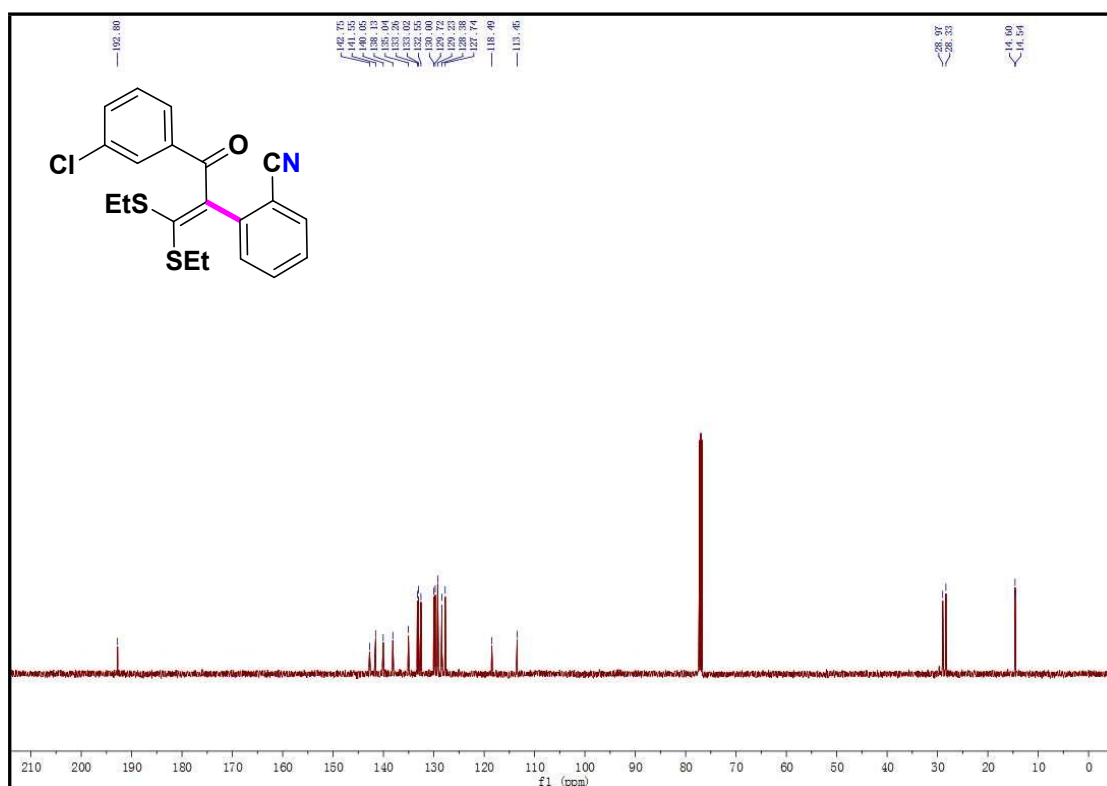

**2-(3-(3-bromophenyl)-1,1-bis(ethylthio)-3-oxoprop-1-en-2-yl)benzonitrile (4d)**

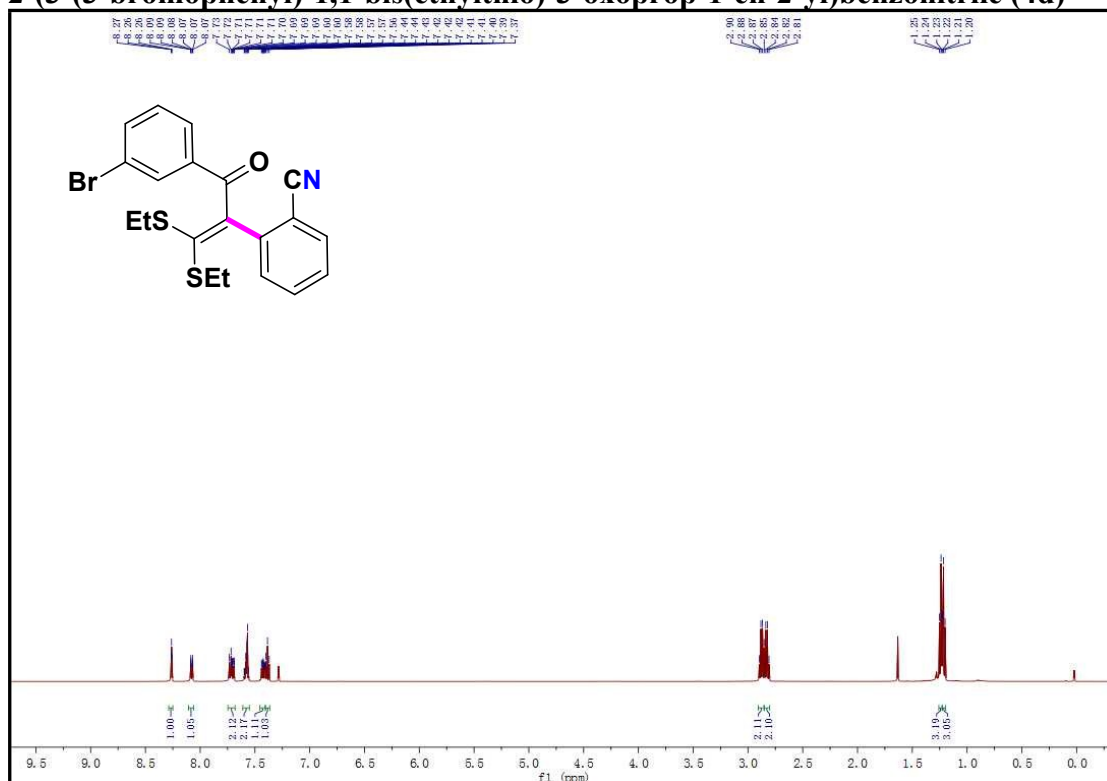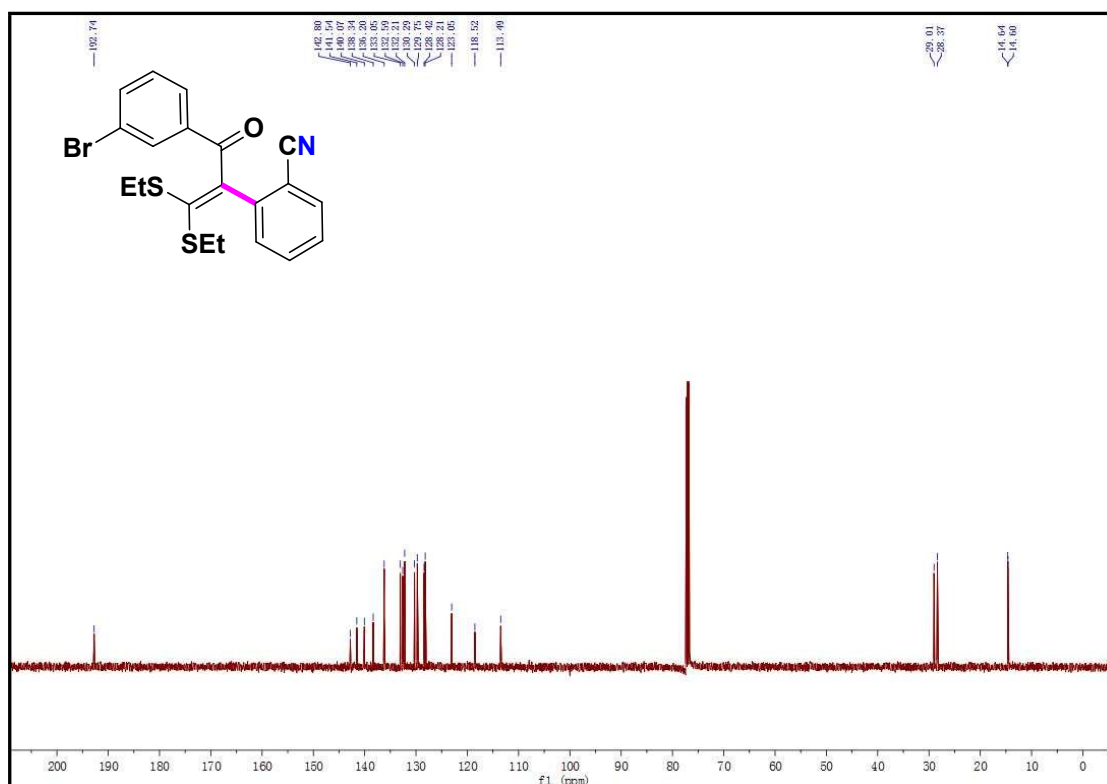

**2-(1,1-bis(ethylthio)-3-oxo-3-(4-(trifluoromethyl)phenyl)prop-1-en-2-yl)benzonitrile (4e)**

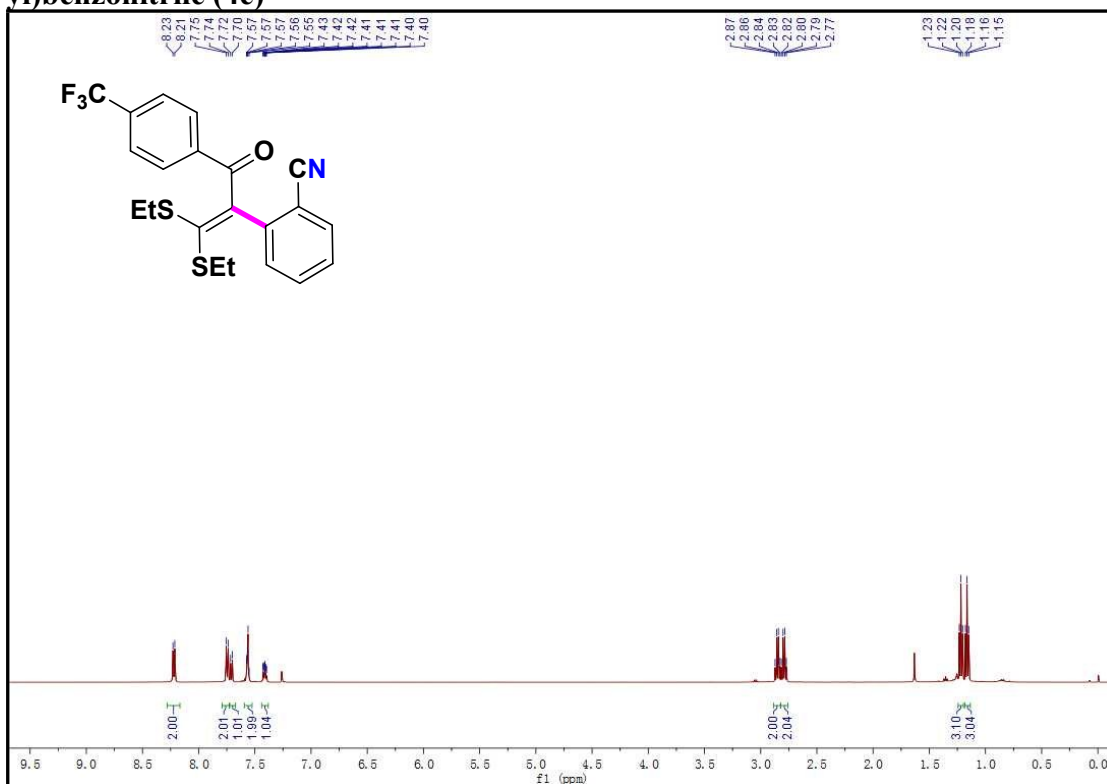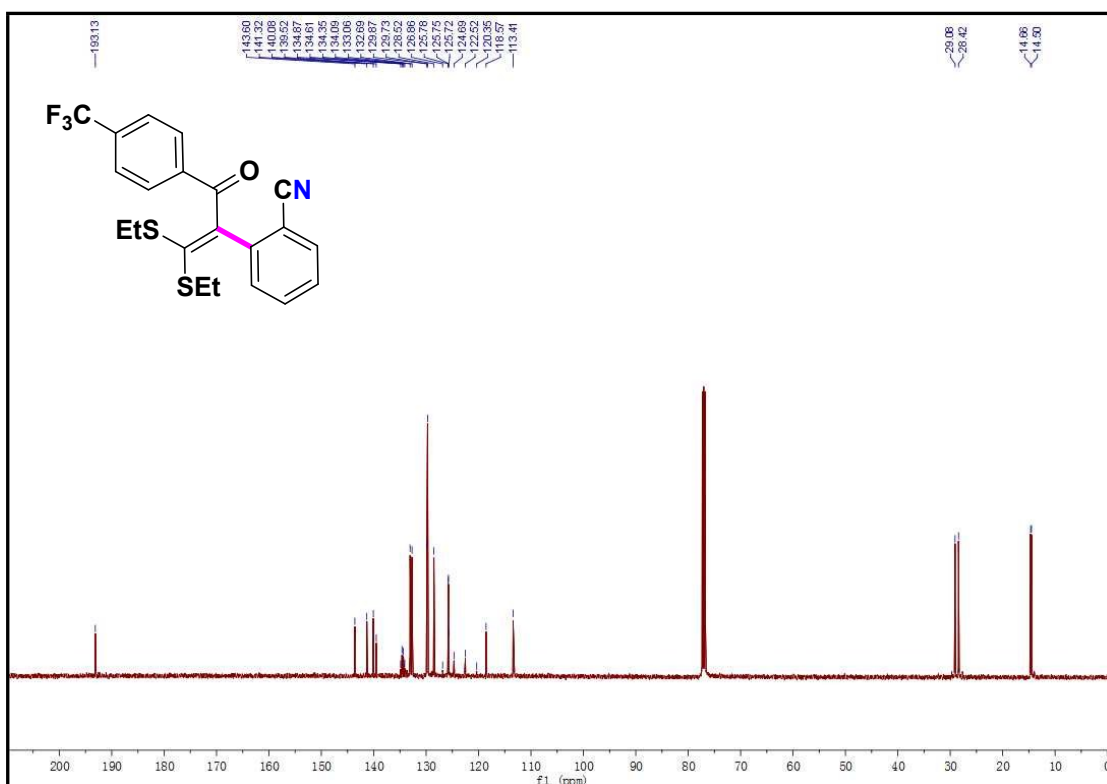



**2-(1,1-bis(ethylthio)-3-(4-(methylthio)phenyl)-3-oxoprop-1-en-2-yl)benzonitrile (4g)**

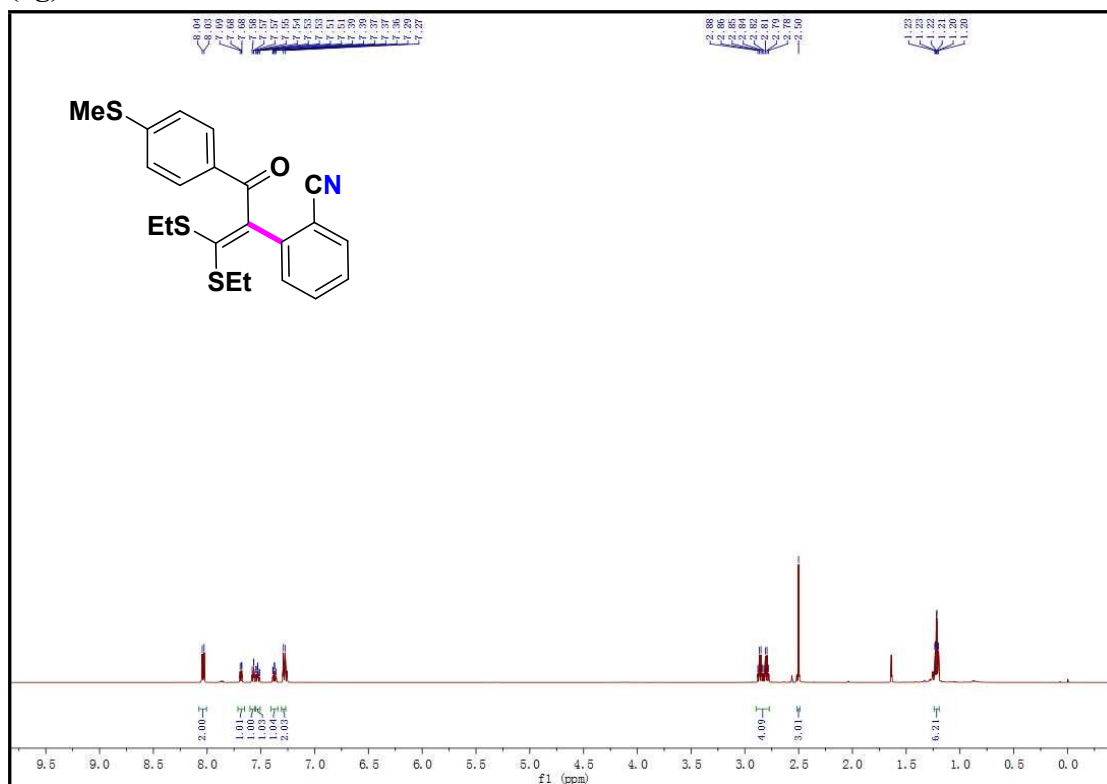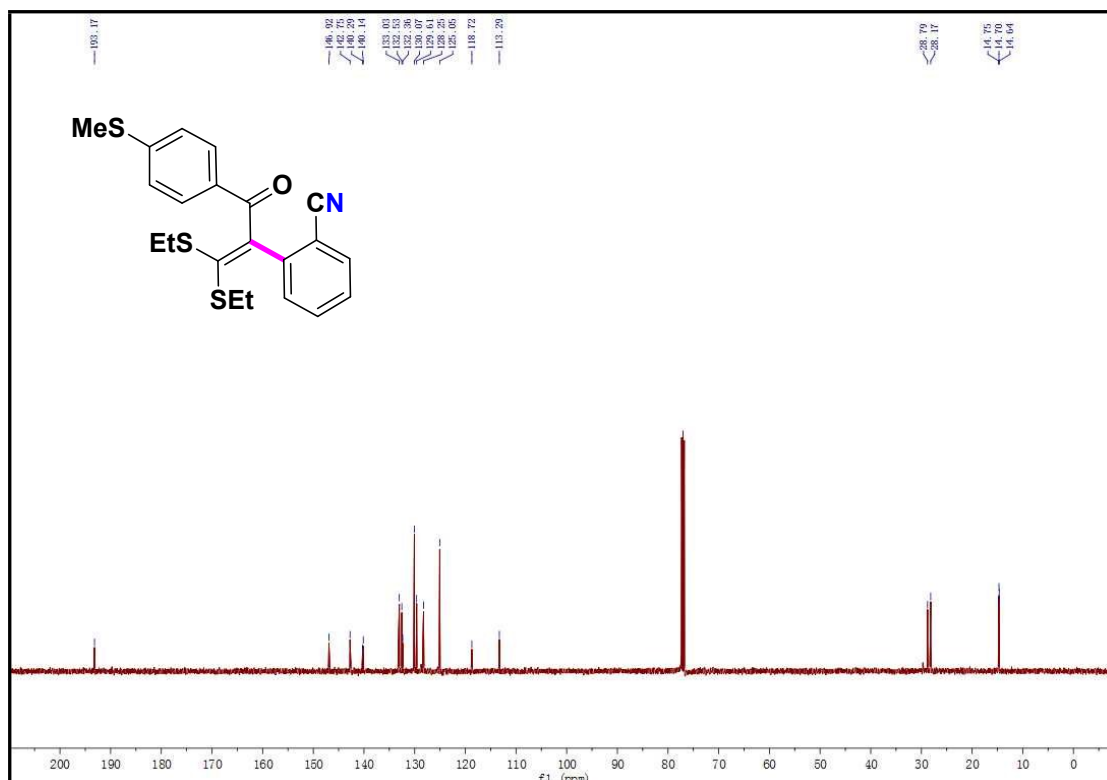

## 2-(1,1-bis(ethylthio)-3-(4-methoxyphenyl)-3-oxoprop-1-en-2-yl)benzonitrile (4h)

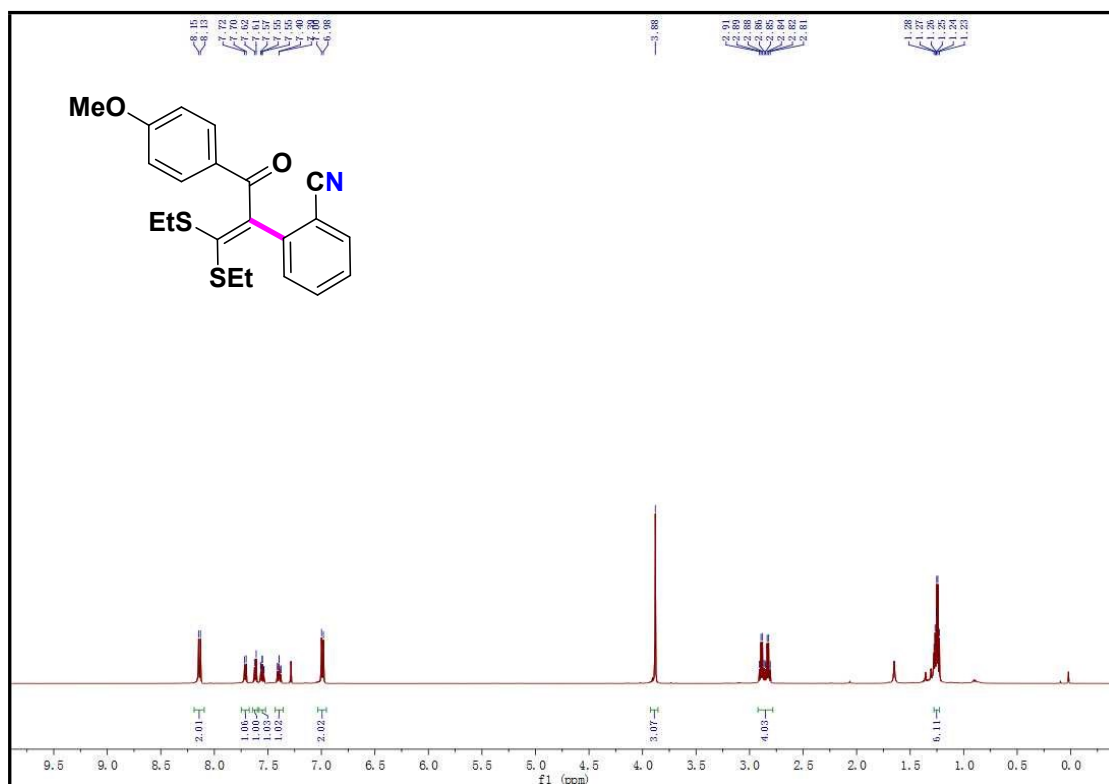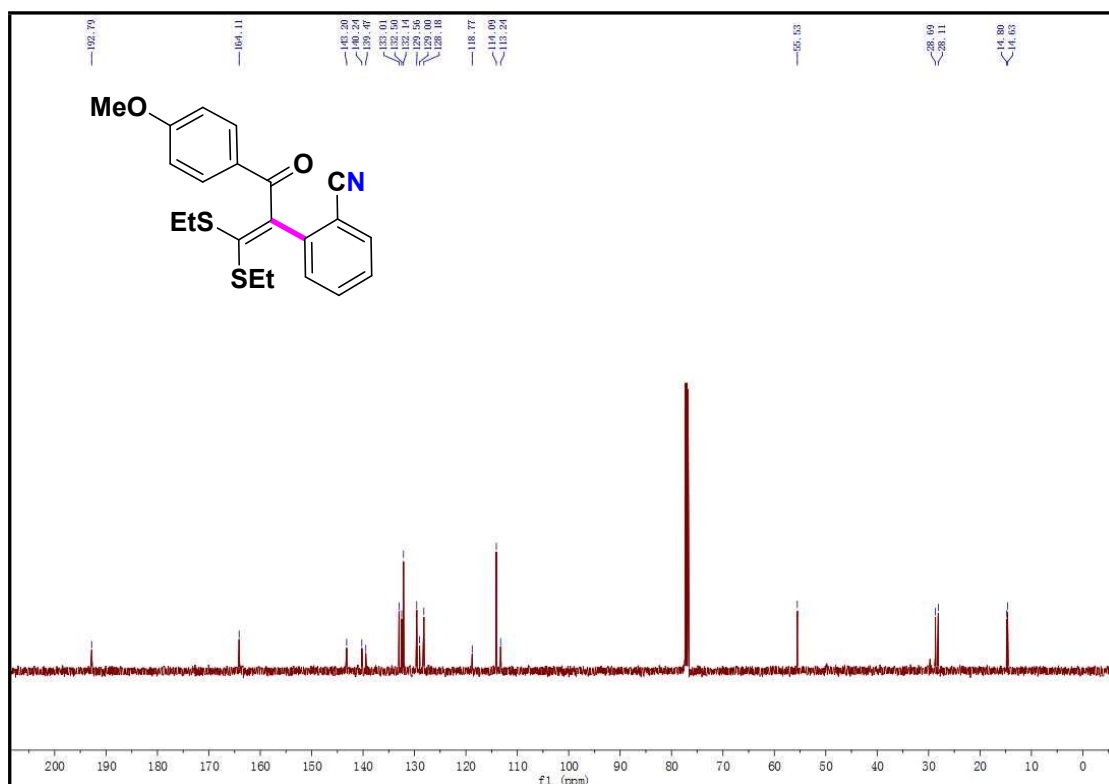

2-(1,1-bis(ethylthio)-3-oxo-3-(p-tolyl)prop-1-en-2-yl)benzonitrile (4i)

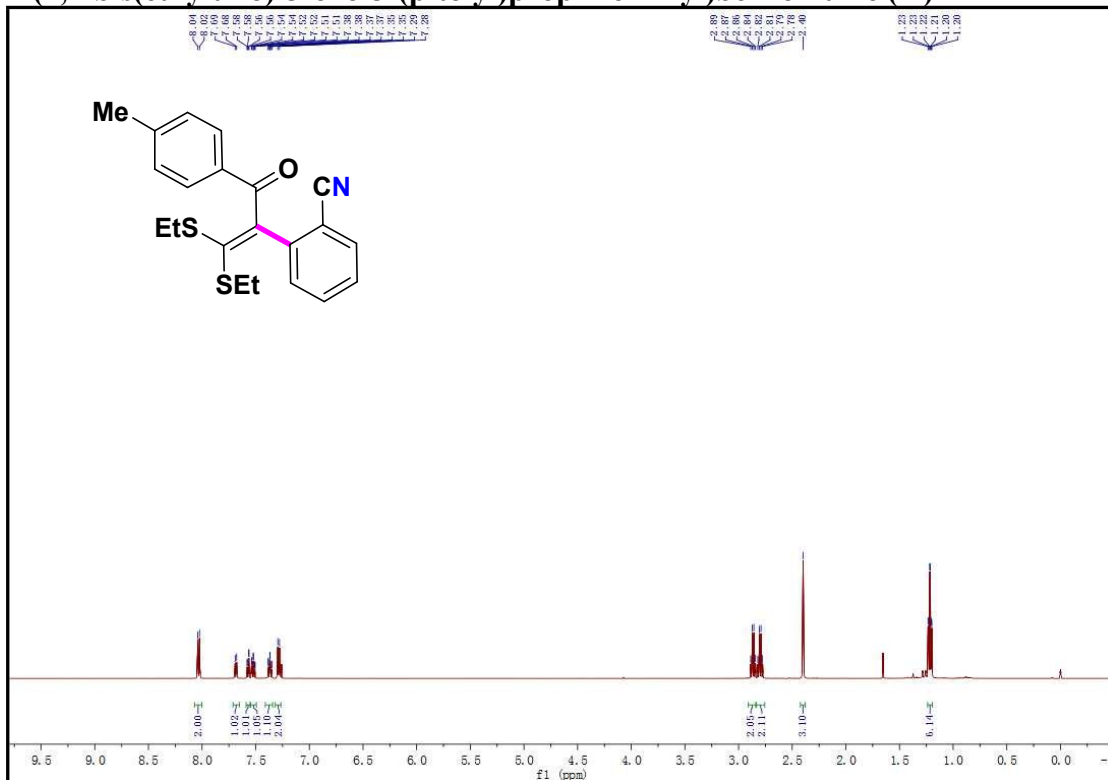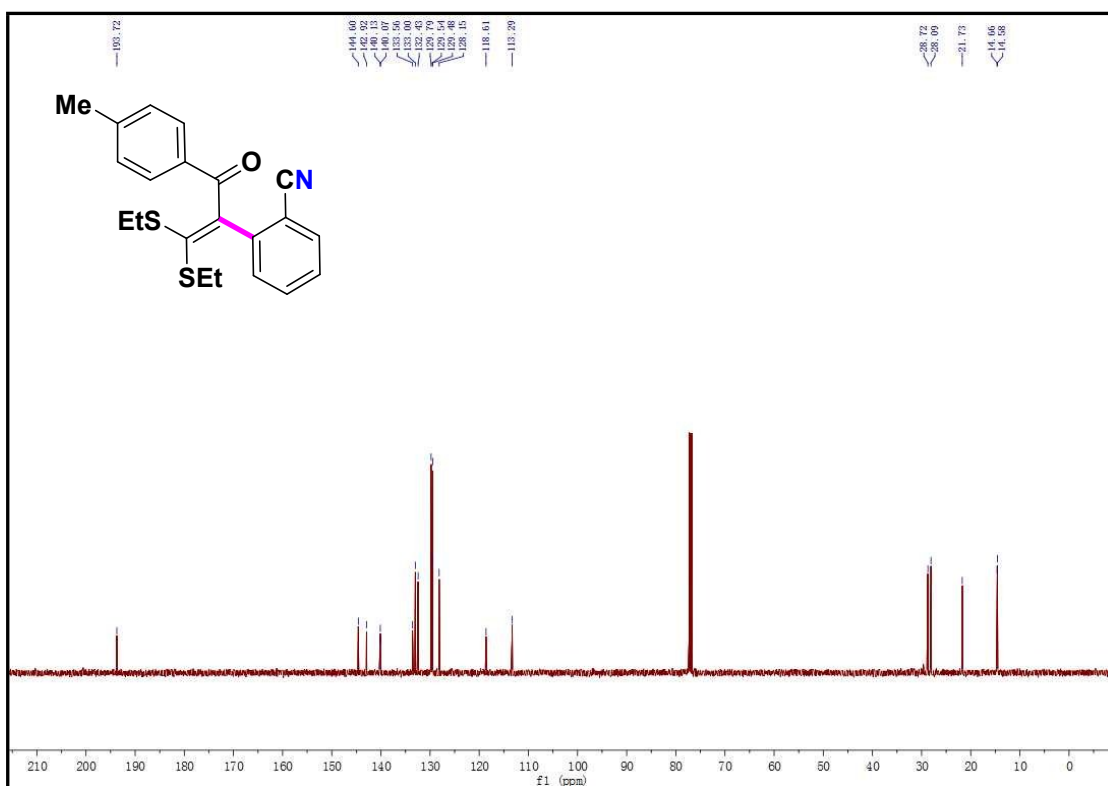



### 2-(1,1-bis(ethylthio)-3-oxo-3-(thiophen-2-yl)prop-1-en-2-yl)benzonitrile (4j)

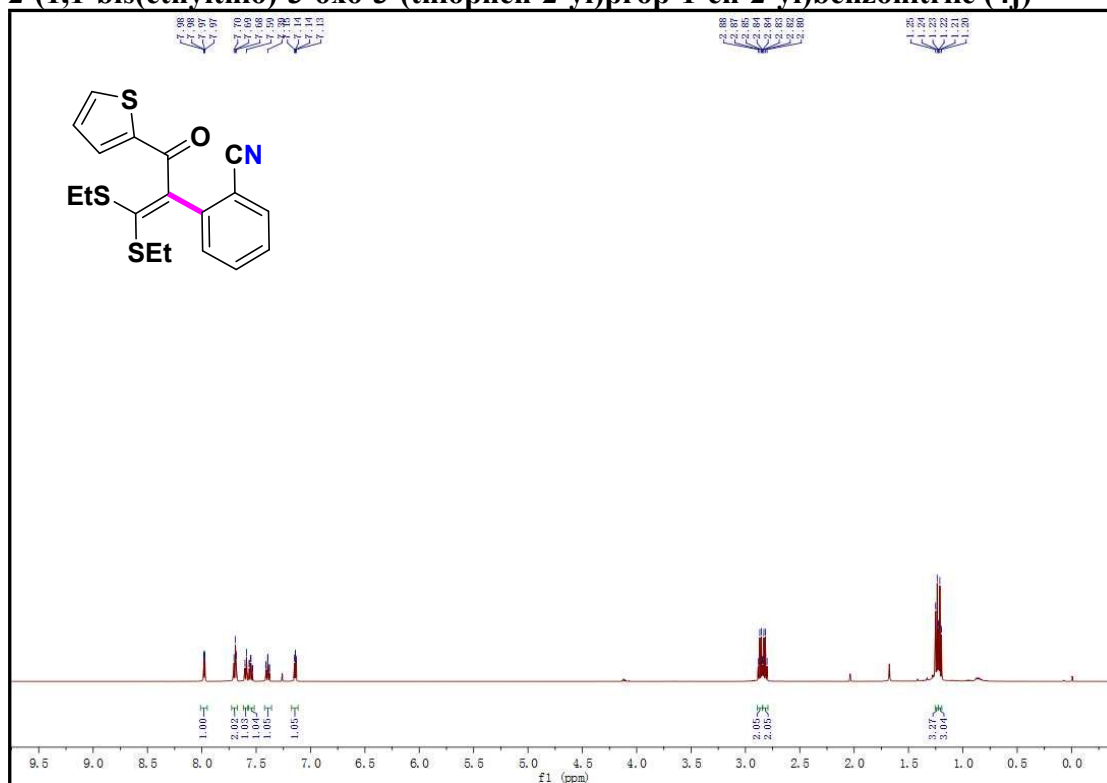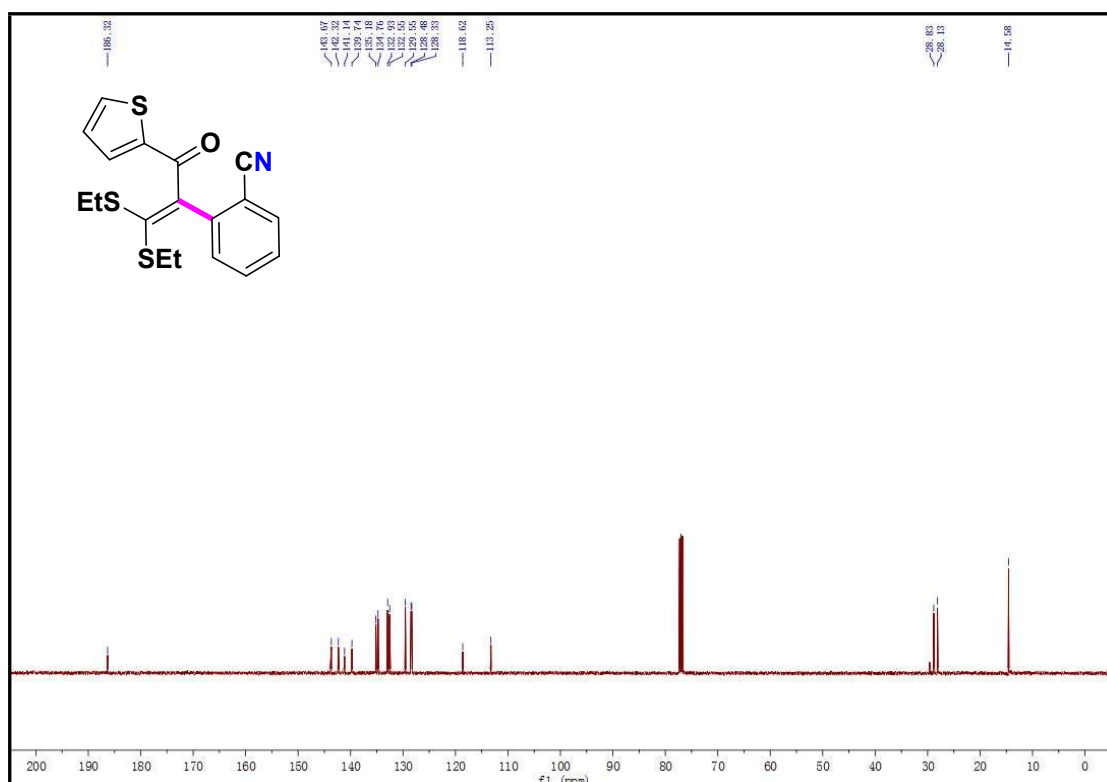

**2-(1,1-bis(methylthio)-3-oxo-3-phenylprop-1-en-2-yl)benzonitrile (4k)**

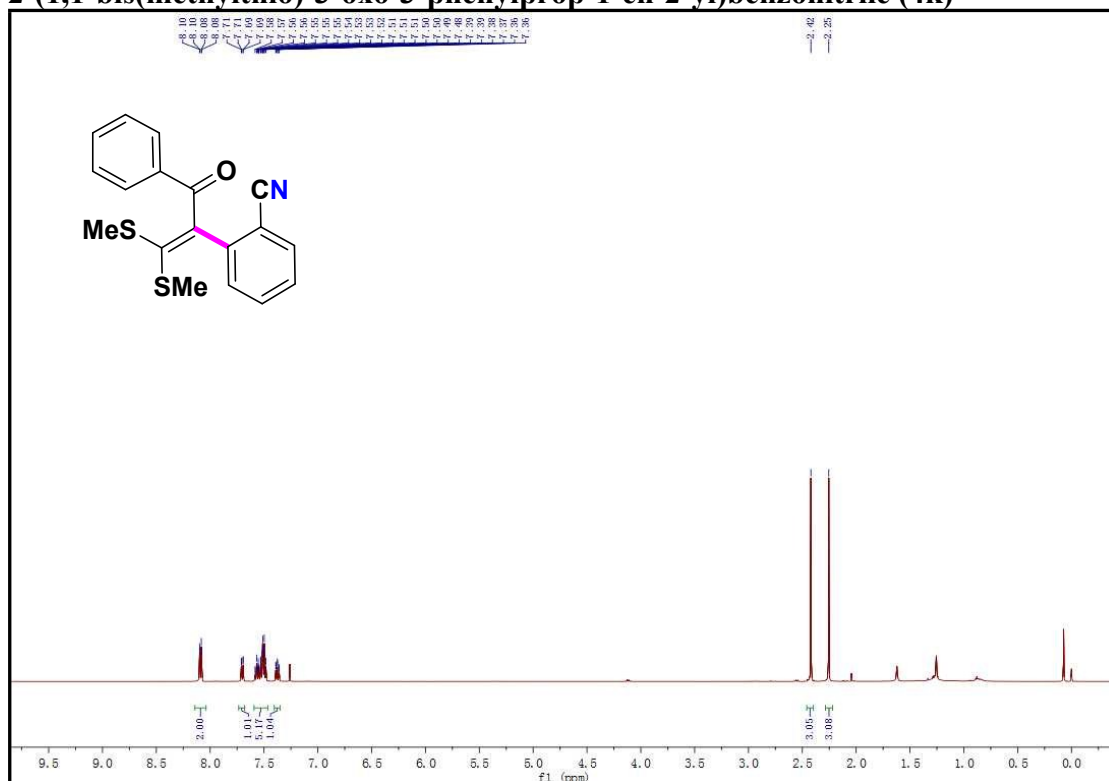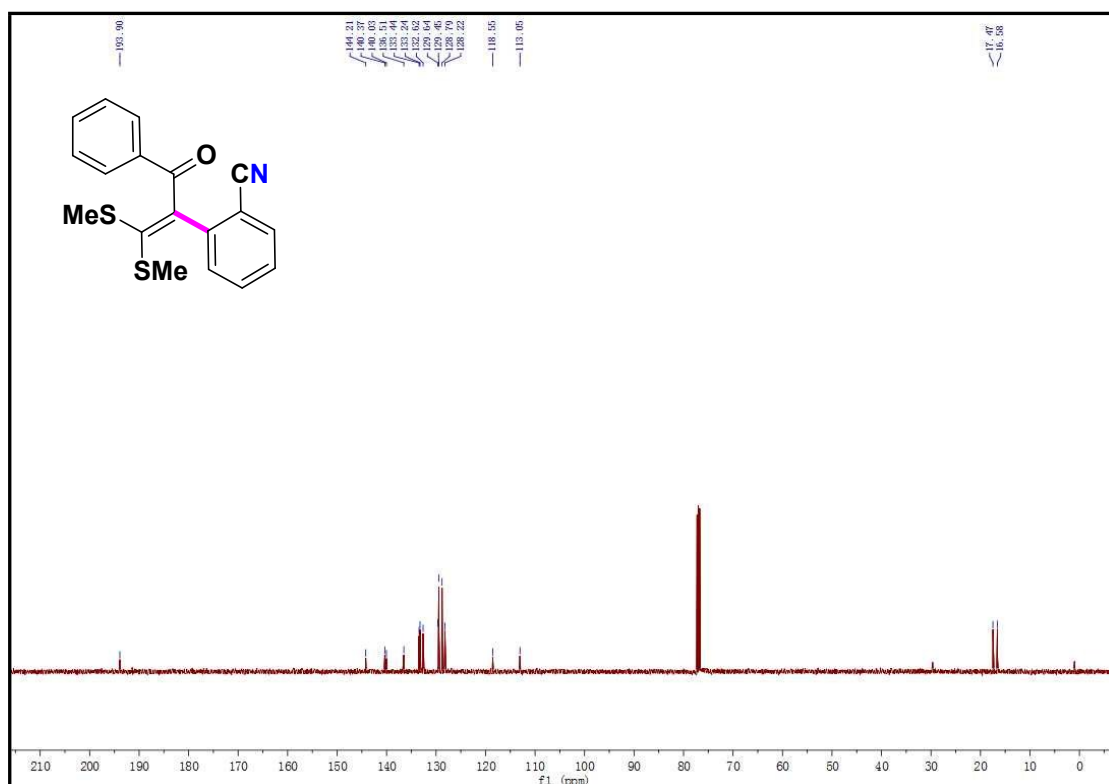

## 2-(1,1-bis(methylthio)-3-oxoferrocen-1-en-2-yl)benzonitrile (4l)

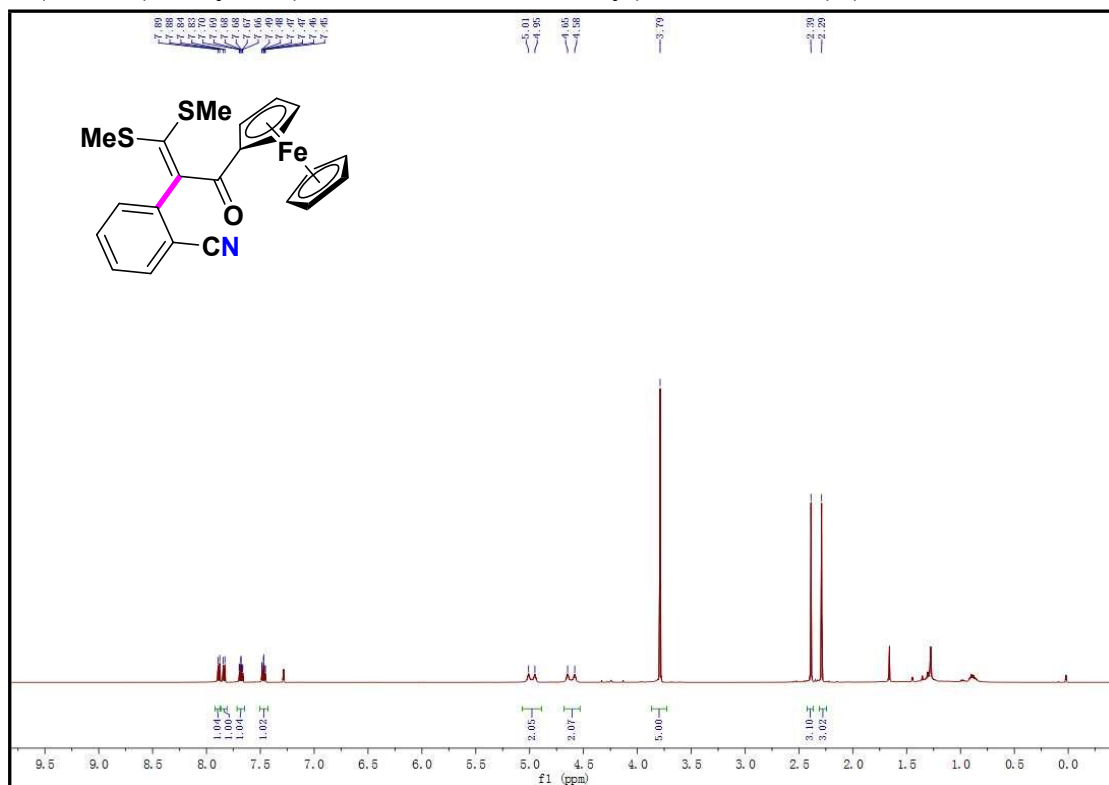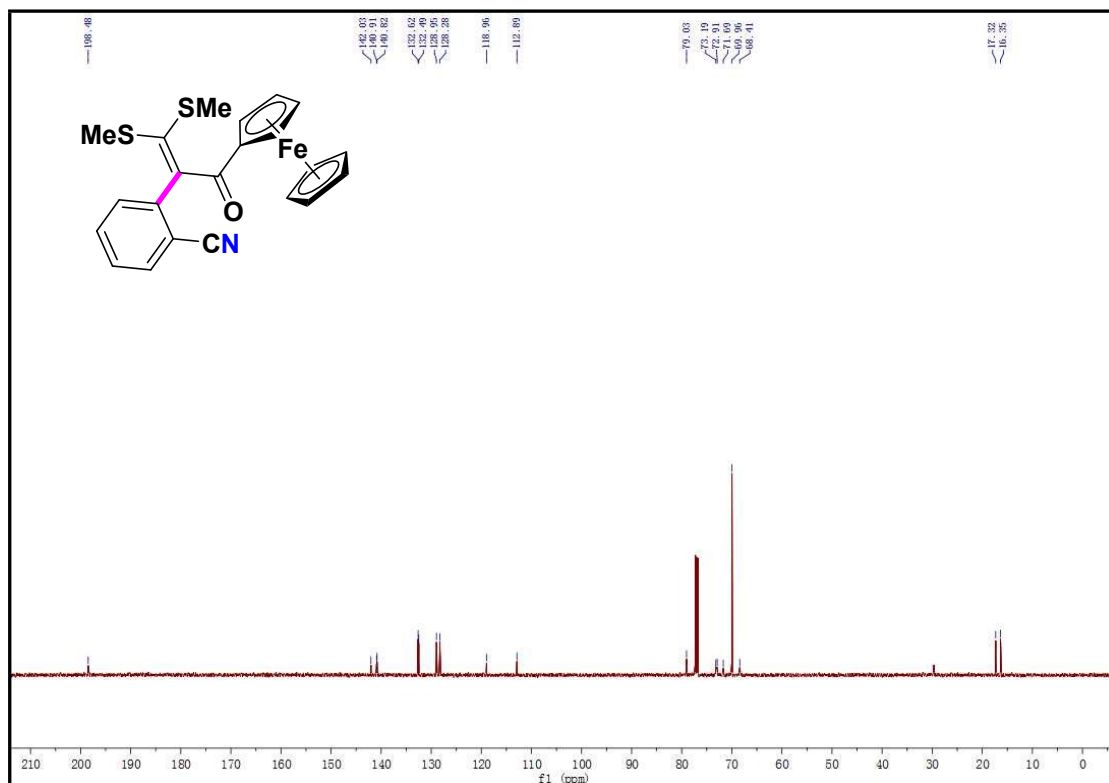

2-(1,1-bis(methylthio)-3-oxo-3-phenylprop-1-en-2-yl)-4-methylbenzonitrile (4m)

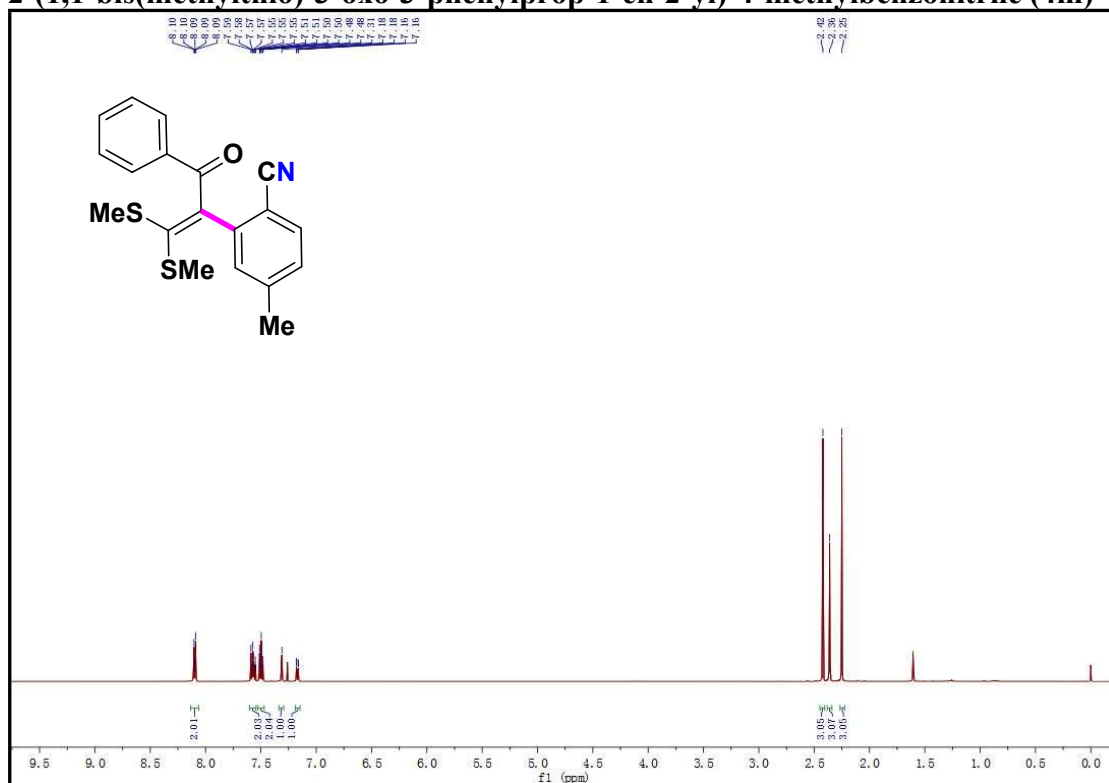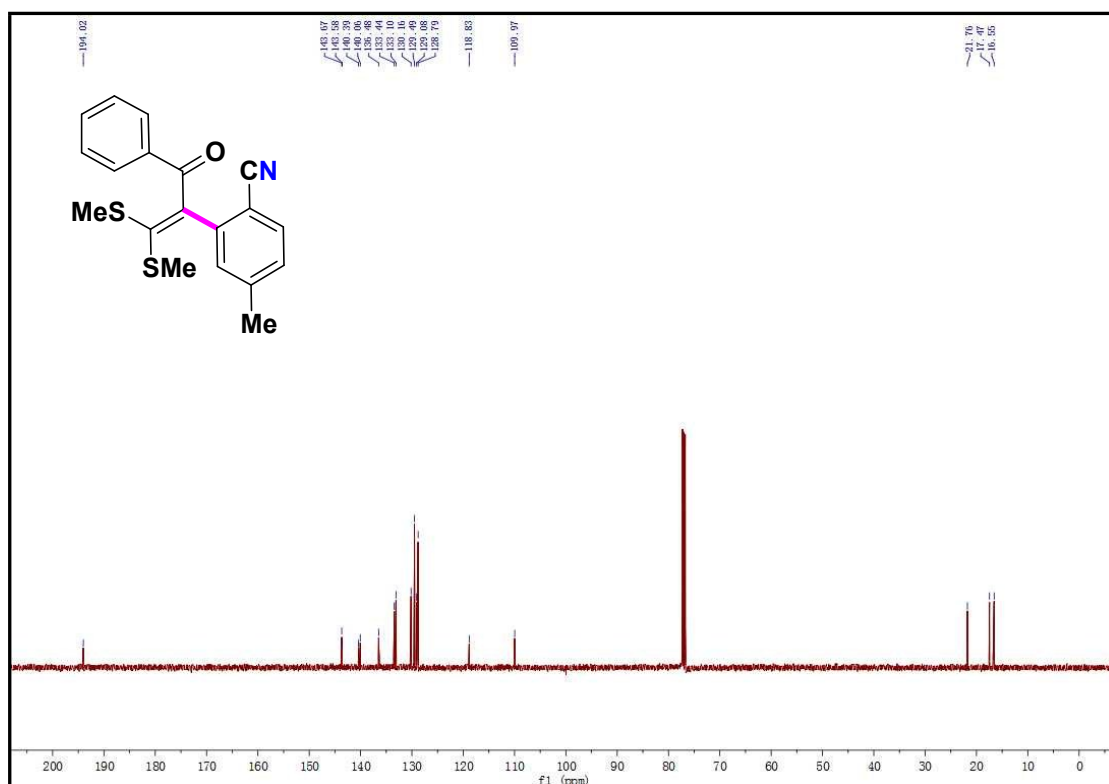

**2-(1,1-bis(methylthio)-3-oxo-3-phenylprop-1-en-2-yl)-[1,1'-biphenyl]-4-carbonitrile (4n)**

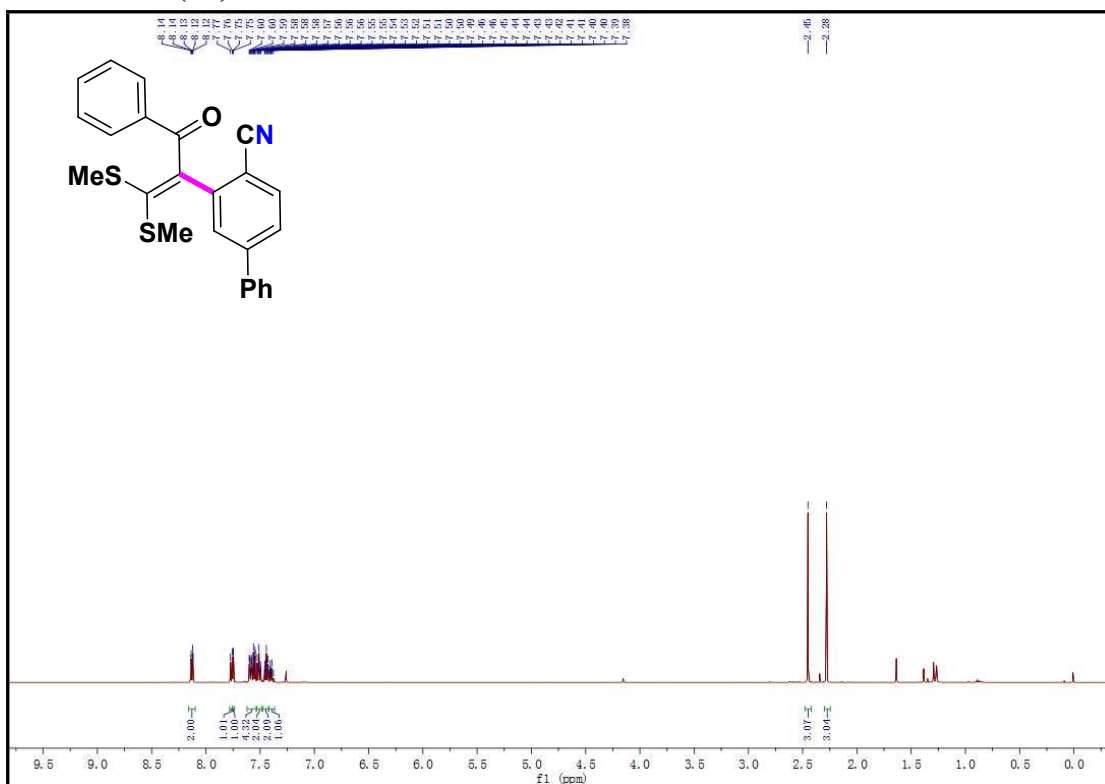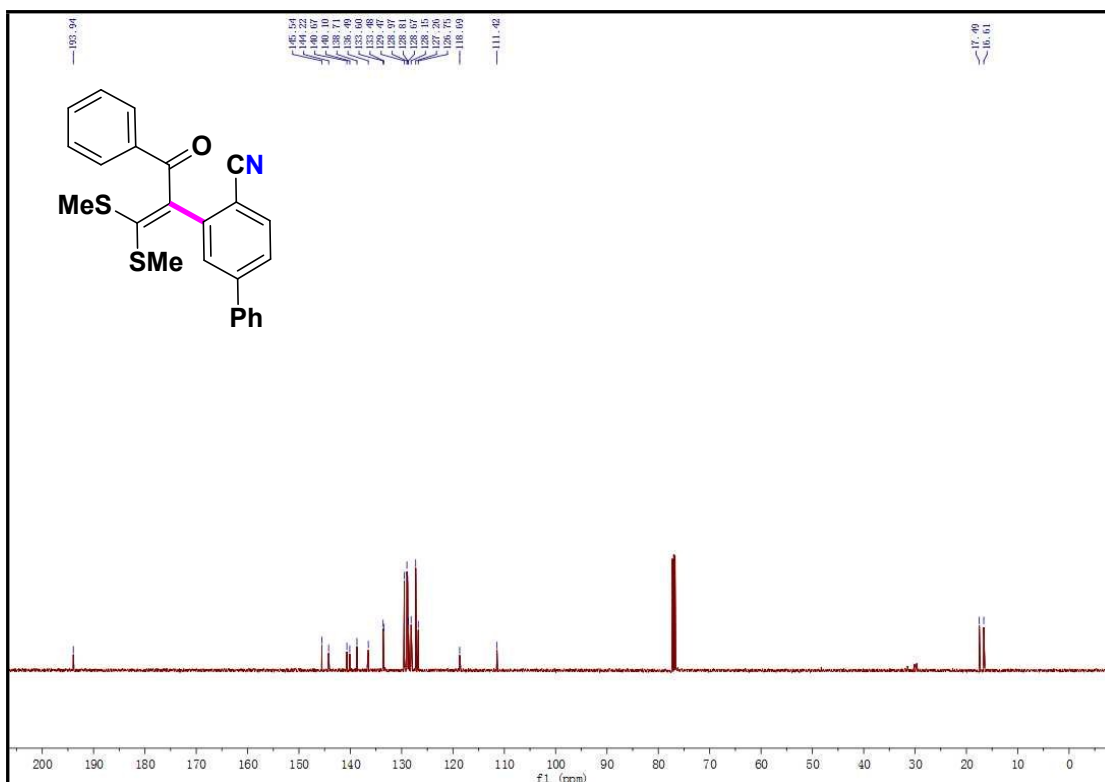

# 2-(1,1-bis(methylthio)-3-oxoferrocen-1-en-2-yl)-4-(trifluoromethyl)benzonitrile

(40)

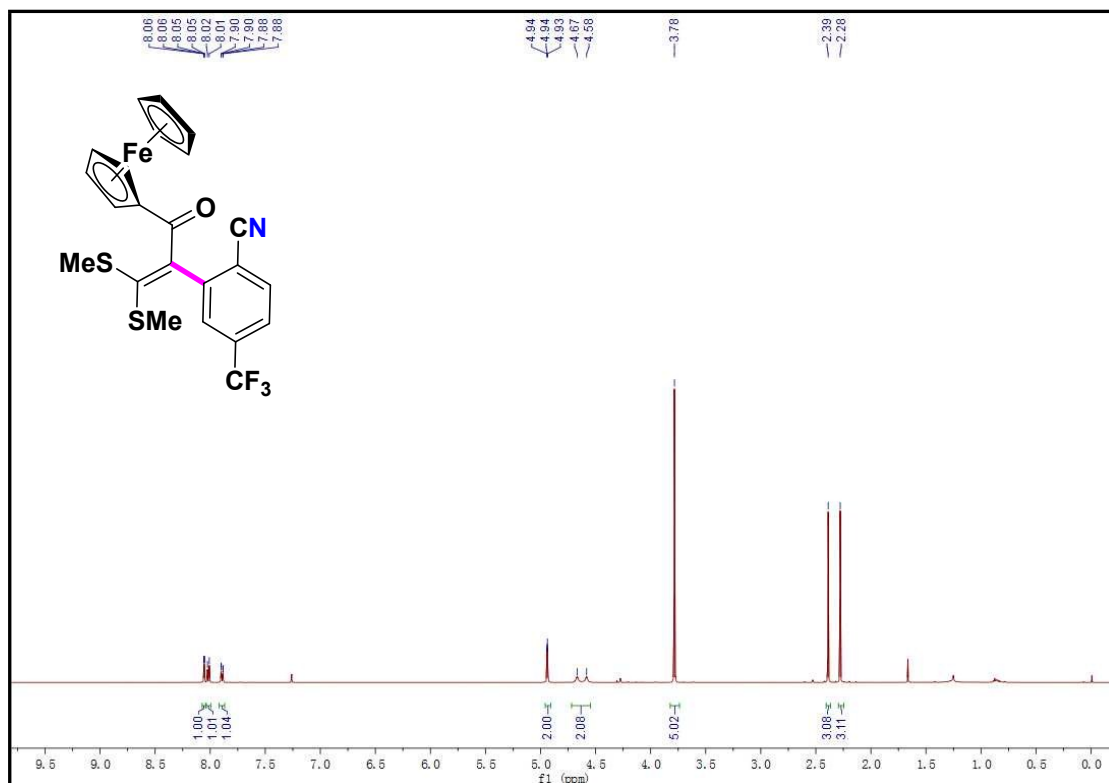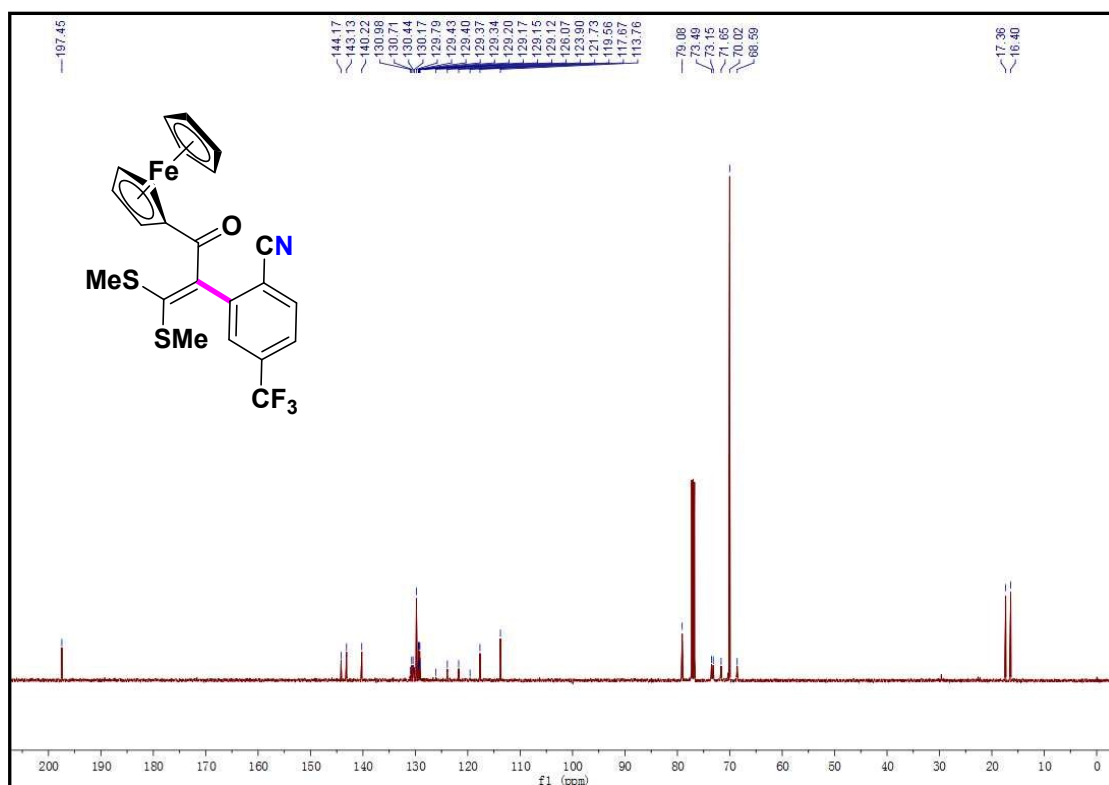

2-(1,1-bis(methylthio)-3-oxoferrocen-1-en-2-yl)-6-chlorobenzonitrile (4p)

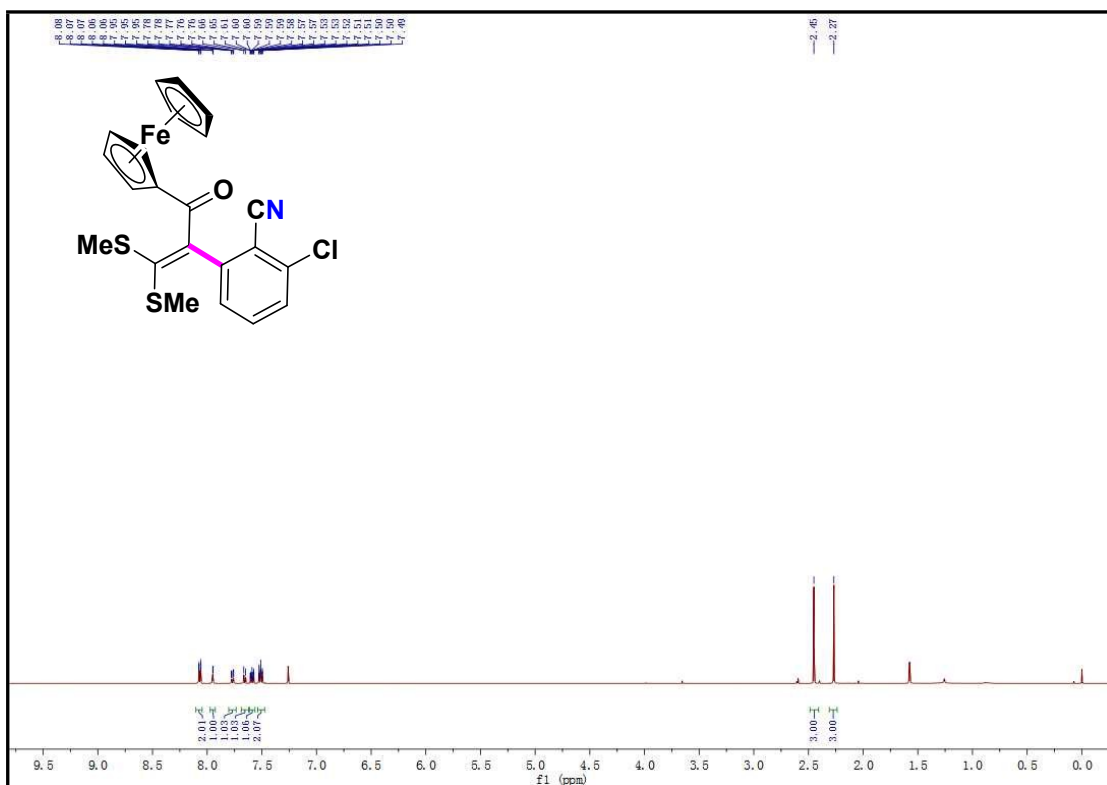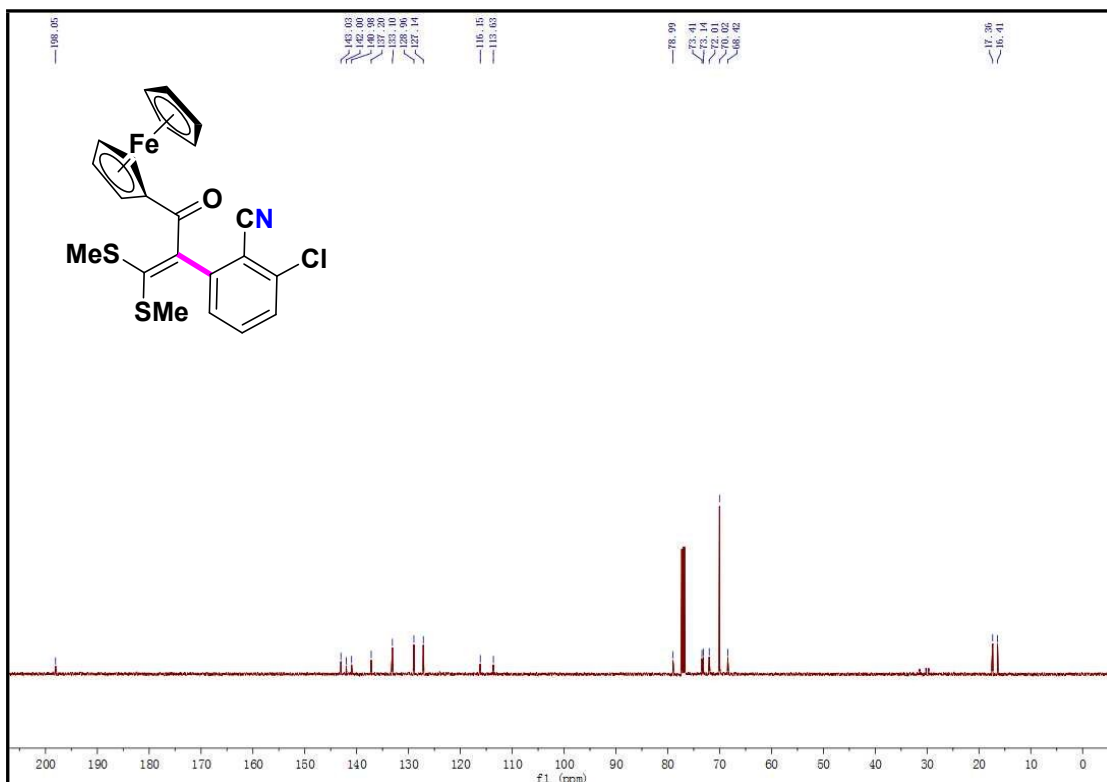

**2-(5-(ethylthio)-3-(thiophen-2-yl)-1H-pyrazol-4-yl)benzonitrile (5)**

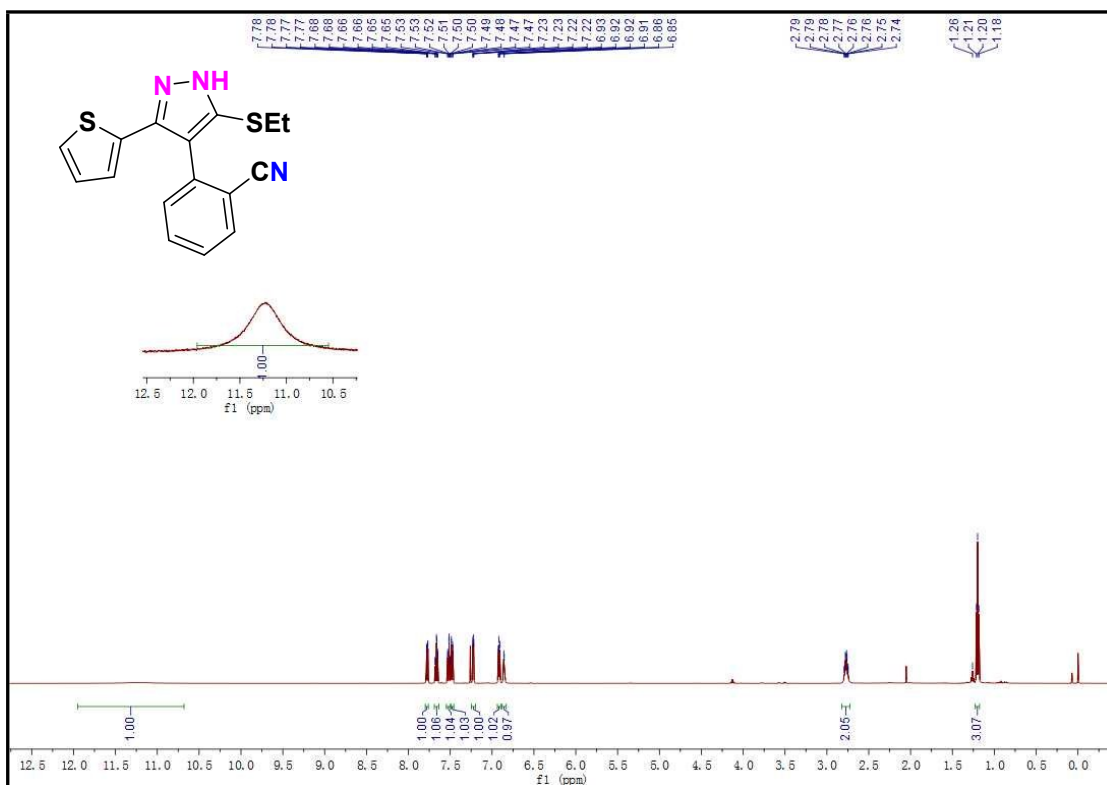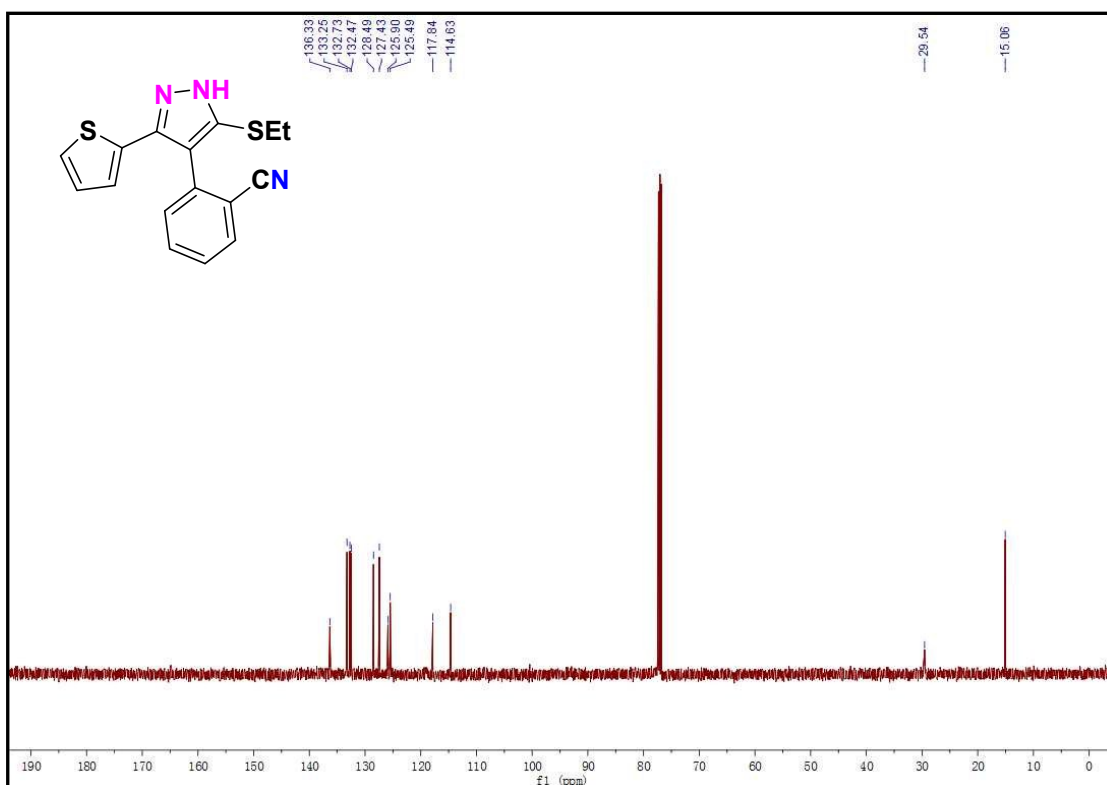

Supplement: c9qo00847k1.pdf [file c9qo00847k1.pdf]
